# Supplementary material for: An empirical evaluation of the impact scenario of pooling bodies of evidence from randomized controlled trials and cohort studies in medical research
Source: Springer Nature journal article supplement (doi:10.1186/s12916-022-02559-y), 2022-10-24
Supplement: MOESM1 [file 23636574]

## ADDITIONAL FILE 1

### **An empirical evaluation of the impact scenario of pooling bodies of evidence from randomized controlled trials and cohort studies in medical research**

Nils Bröckelmann<sup>1\*</sup>, Julia Stadelmaier<sup>1\*</sup>, Louisa Harms<sup>1</sup>, Charlotte Kubiak<sup>1</sup>, Jessica Beyerbach<sup>1</sup>, Martin Wolkewitz<sup>2</sup>, Jörg J Meerpohl<sup>1,3</sup>, Lukas Schwingshackl<sup>1</sup>

<sup>1</sup> Institute for Evidence in Medicine, Medical Center - University of Freiburg, Faculty of Medicine, University of Freiburg, Freiburg, Germany.

<sup>2</sup> Institute of Medical Biometry and Statistics, Faculty of Medicine and Medical Center - University of Freiburg, Freiburg, Germany.

<sup>3</sup> Cochrane Germany, Cochrane Germany Foundation, Freiburg, Germany.

\*contributed equally

Corresponding author:

Lukas Schwingshackl, PhD

Breisacher Straße 86, 79110 Freiburg, Germany

M: schwingshackl@ifem.uni-freiburg.de

P: +49 (0)761 203-96867

ORCID number: 0000-0003-3407-7594

Twitter: <https://twitter.com/LSchwingshackl>

**Content Supplement**

**Appendix S1: Search strategy for systematic reviews in MEDLINE via PubMed ..... 3**

**Table S1: Explanation and definition for Population (P), Intervention/Exposure (I/E), Comparator (C), Outcome (O) similarity degree ..... 4**

**Table S2: Ratings of Population (P), Intervention/Exposure (I/E), Comparator (C), Outcome (O) similarity degree for all identified body of evidence-pairs..... 6**

**Table S3: Differences between published (reported) effect estimates and re-calculated effect estimates ..... 15**

**Table S4: Reason for exclusion from the pooling scenario..... 22**

**Table S5: Pooling results of bodies of evidence from cohort studies with RCTs based on random effects and common effect model, 95% prediction intervals, heterogeneity, test for subgroup difference, and Population (P), Intervention (I) /Exposure (E), Comparator (C) Outcome similarity degree..... 23**

**Figure S1 to 118: Forest plots..... 33**

**Supplementary References ..... 151**

### Appendix S1: Search strategy for systematic reviews in MEDLINE via PubMed

| ID | Search                                                                                                                                                                                                                                                                                                                                                                                                                                                                                      |
|----|---------------------------------------------------------------------------------------------------------------------------------------------------------------------------------------------------------------------------------------------------------------------------------------------------------------------------------------------------------------------------------------------------------------------------------------------------------------------------------------------|
| #1 | "lancet london england"[Journal] OR "JAMA"[Journal] OR "bmj clinical research ed"[Journal] OR "jama internal medicine"[Journal] OR "Annals of internal medicine"[Journal] OR "PLoS medicine"[Journal] OR "BMC medicine"[Journal] OR "The Cochrane database of systematic reviews"[Journal] OR "Mayo Clinic proceedings"[Journal] OR "Canadian Medical Association journal"[Journal] OR "Nat Rev Dis Primers"[Journal] OR "J Cachexia Sarcopenia Muscle"[Journal] OR "N Engl J Med"[Journal] |
| #2 | "systematic review"[Title/Abstract] OR "systematic literature review"[Title/Abstract] OR "systematic scoping review"[Title/Abstract] OR "systematic meta-review"[Title/Abstract] OR "systematic search"[Title/Abstract] OR "systematic review"[Publication Type] OR "meta analys*"[Title/Abstract] OR "meta analys*"[Publication Type] OR "cochrane database syst rev"[Journal]                                                                                                             |
| #3 | "random*"[Title/Abstract] OR "placebo"[Title/Abstract] OR "clinical trials as topic"[MeSH Terms:noexp] OR "trial"[Title]                                                                                                                                                                                                                                                                                                                                                                    |
| #4 | "epidemiolog*"[Title/Abstract] OR "cohort stud*"[Title/Abstract] OR "observation*"[Title/Abstract] OR "non rct*"[Title/Abstract] OR "non random*"[Title/Abstract]                                                                                                                                                                                                                                                                                                                           |
| #5 | #1 AND #2 AND #3 AND #4                                                                                                                                                                                                                                                                                                                                                                                                                                                                     |
| #6 | #1 AND #2 AND #3 AND #4 Filters: from 2010/1/1 - 2019/12/31                                                                                                                                                                                                                                                                                                                                                                                                                                 |

**Table S1:** Explanation and definition for Population (P), Intervention/Exposure (I/E), Comparator (C), Outcome (O) similarity degree

| Rating                                         | Population                                                                                                                                                 | Intervention/Exposure                                                                                                                                                                                                                                                                                                                                                             | Comparator                                                                                                                           | Outcome                                               |
|------------------------------------------------|------------------------------------------------------------------------------------------------------------------------------------------------------------|-----------------------------------------------------------------------------------------------------------------------------------------------------------------------------------------------------------------------------------------------------------------------------------------------------------------------------------------------------------------------------------|--------------------------------------------------------------------------------------------------------------------------------------|-------------------------------------------------------|
| <b>1 =<br/>“more or less<br/>identical”</b>    | Same health status and type of population                                                                                                                  | Same drug, invasive procedure, nutrition-intervention or vaccine                                                                                                                                                                                                                                                                                                                  | -Same drug or invasive procedure<br>-Nutrition: Placebo vs. Nil or low intake; Low intake vs. Low intake                             | Same outcome                                          |
|                                                | e.g.<br>-Both BoE with either healthy population, general population or diseased population<br>-Same age category (both adults, both postmenopausal women) | e.g.<br>- Both Enoxaparin<br>- Both PCI<br>- Both high dairy-intake                                                                                                                                                                                                                                                                                                               | e.g.<br>-Both no Enoxaparin<br>-Both UKA<br>-Placebo vs. No intervention or low intake                                               | e.g.<br>Mortality in both BoE                         |
| <b>2 =<br/>“similar but<br/>not identical”</b> | Populations with mixed health status in RCTs and/ or cohort studies                                                                                        | -Different drugs of the same class/<br>Any drug of the same class vs. Specific drug of the same class<br>-Similar invasive procedure/ same invasive procedure with different co-interventions<br>-Similar vaccines or identical vaccine with different route of administration<br>-Supplementary or free food vs. Intake<br>-Similar but not identical time frame of intervention | -Different drugs of the same class<br>-Similar invasive procedures, drug, vaccine or diet<br>-General dietary advice vs. High intake | -Similar outcome<br>-Both with mixed similar outcomes |

|                                  |                                                                                                                                                                                                                                                                                                                                 |                                                                                                                                                                                                                                                                                                                                                                                                                                                                                  |                                                                                                                                                                                                                                                                                                                                                                                                      |                                                                                                                                                                               |
|----------------------------------|---------------------------------------------------------------------------------------------------------------------------------------------------------------------------------------------------------------------------------------------------------------------------------------------------------------------------------|----------------------------------------------------------------------------------------------------------------------------------------------------------------------------------------------------------------------------------------------------------------------------------------------------------------------------------------------------------------------------------------------------------------------------------------------------------------------------------|------------------------------------------------------------------------------------------------------------------------------------------------------------------------------------------------------------------------------------------------------------------------------------------------------------------------------------------------------------------------------------------------------|-------------------------------------------------------------------------------------------------------------------------------------------------------------------------------|
|                                  | <p>e.g.</p> <ul style="list-style-type: none"> <li>-Merged healthy and diseased population in one BoE vs. healthy population in the other BoE</li> <li>-Both BoE with merged healthy and diseased population</li> <li>-Population with cardiovascular risk factors (without manifest disease) vs. Healthy population</li> </ul> | <p>e.g.</p> <ul style="list-style-type: none"> <li>-Both different SGAs</li> <li>-Both similar regional anaesthetic nerve blocks</li> <li>-Various pneumococcal vaccines (2,3,12,14,17 and 23-valent) versus 23-valent only</li> <li>-One or two doses of measles containing vaccines versus unclear number of doses</li> <li>-Free non-caloric beverages vs. Low intake of SSBs</li> <li>-Early intervention with different time frame (first 14 vs. first 24 hours)</li> </ul> | <p>e.g.</p> <ul style="list-style-type: none"> <li>-Both different DDP-4 inhibitors</li> <li>-“Best medical treatment” with Aspirin and additionally with various other drugs</li> <li>-No vaccination or delayed vaccination versus no vaccination</li> <li>-Transfemoral vs. transapical TAVI</li> <li>-General dietary advice vs. High red meat intake</li> </ul>                                 | <p>e.g.</p> <ul style="list-style-type: none"> <li>-Late stage only or all CRC vs. All CRC</li> <li>-Both with mixed sedation outcomes (e.g. Sleepiness, sedation)</li> </ul> |
| <b>3 =<br/>“broadly similar”</b> | <ul style="list-style-type: none"> <li>-Different health status of populations in RCTs and cohort studies</li> <li>-Other substantial differences (e.g. Age-category, type of population)</li> </ul>                                                                                                                            | <ul style="list-style-type: none"> <li>-Same drug for different indication</li> <li>-Enhanced treatment vs. Any treatment</li> <li>-Supplement vs. Status</li> <li>-Different time frame/ early treatment vs. Any treatment</li> </ul>                                                                                                                                                                                                                                           | <ul style="list-style-type: none"> <li>-Active intervention (drug, invasive procedure, nutrient) vs. No intervention or placebo</li> <li>-Different time frame</li> </ul>                                                                                                                                                                                                                            | <p>-Broadly similar</p>                                                                                                                                                       |
|                                  | <p>e.g.</p> <ul style="list-style-type: none"> <li>-Healthy population in one BoE vs. population with cardiovascular disease in the other BoE</li> <li>-Children/adolescents vs. Adults</li> <li>-Travellers vs. Pregnant women</li> </ul>                                                                                      | <p>e.g.</p> <ul style="list-style-type: none"> <li>-Digoxin for HF vs. digoxin post-myocardial infarction without HF</li> <li>-Dispatcher-assisted bystander CPR vs. unassisted bystander CPR</li> <li>-Enhanced training of birth attendants vs. Any support by birth attendant</li> <li>-Selenium supplements vs. High selenium status</li> <li>-Early ART vs. Any ART</li> </ul>                                                                                              | <p>e.g.</p> <ul style="list-style-type: none"> <li>-Restrictive transfusion vs. No transfusion</li> <li>-Placebo vs. Low selenium status</li> <li>-No vaccination of health care workers vs. Low share of vaccinated health care workers per facility</li> <li>-Pregnant women with untreated bacteriuria vs. Pregnant without screening for bacteriuria</li> <li>-Delayed ART vs. No ART</li> </ul> | <p>e.g.</p> <ul style="list-style-type: none"> <li>-Colorectal adenoma vs. Cancer</li> </ul>                                                                                  |

ART: antiretroviral therapy; BoE: bodies of evidence; CRC: colorectal cancer; CPR: cardiopulmonary resuscitation; DDP-4: dipeptidyl peptidase 4; HF: heart failure; PCI: percutaneous coronary intervention; PI/ECO: population, intervention/ exposure, comparator, outcome; RCT: randomized controlled trial; SGA: second-generation antipsychotic; SSBs: sugar-sweetened beverages; TAVI: transcatheter aortic valve replacement; UKA: unicompartmental knee arthroplasty

**Table S2:** Ratings of Population (P), Intervention/Exposure (I/E), Comparator (C), Outcome (O) similarity degree for all identified body of evidence-pairs

| Reference           | Intervention/<br>Exposure<br>(as defined by the<br>authors) | Intervention<br>/<br>Exposure<br>type | Outcome<br>(as defined by<br>the authors) | Outcome-category                                                                 | Rating of PI/ECO-similarity degree |                           |            |         |         | Included in<br>the pooling<br>scenario<br>(Yes/No) |
|---------------------|-------------------------------------------------------------|---------------------------------------|-------------------------------------------|----------------------------------------------------------------------------------|------------------------------------|---------------------------|------------|---------|---------|----------------------------------------------------|
|                     |                                                             |                                       |                                           | (e.g., cancer<br>outcomes,<br>cardiovascular<br>disease, all-cause<br>mortality) | Patients/<br>Population            | Intervention/<br>Exposure | Comparator | Outcome | Overall |                                                    |
| Abou-Setta 2011 (1) | Nerve block                                                 | Invasive                              | Delirium                                  | Neurological                                                                     | 2                                  | 2                         | 2          | 1       | 2       | No                                                 |
| Abou-Setta 2011 (1) | Spinal anaesthesia                                          | Invasive                              | All-cause<br>mortality                    | All-cause mortality                                                              | 2                                  | 1                         | 1          | 1       | 2       | No                                                 |
| Aburto 2013 (2)     | Low sodium                                                  | Nutrition                             | All-cause<br>mortality                    | All-cause mortality                                                              | 2                                  | 2                         | 2          | 1       | 2       | Yes                                                |
| Aburto 2013 (2)     | Low sodium                                                  | Nutrition                             | Cardiovascular<br>disease                 | Cardiovascular disease                                                           | 2                                  | 2                         | 2          | 2       | 2       | Yes                                                |
| Ahmad 2015 (3)      | Intra-aortic balloon<br>pump                                | Invasive                              | All-cause<br>mortality                    | All-cause mortality                                                              | 1                                  | 1                         | 1          | 1       | 1       | Yes                                                |
| Alexander 2017 (4)  | High DHA and EPA                                            | Nutrition                             | Coronary heart<br>disease                 | Cardiovascular disease                                                           | 2                                  | 2                         | 2          | 1       | 2       | No                                                 |
| Alexander 2017 (4)  | High DHA and EPA                                            | Nutrition                             | Coronary heart<br>disease mortality       | Cardiovascular disease                                                           | 2                                  | 2                         | 2          | 1       | 2       | No                                                 |
| Alexander 2017 (4)  | High DHA and EPA                                            | Nutrition                             | Coronary heart<br>disease incidence       | Cardiovascular disease                                                           | 2                                  | 2                         | 2          | 1       | 2       | No                                                 |
| Alipanah 2018 (5)   | Self-administered<br>therapy                                | Drug                                  | Treatment success                         | Infectiological                                                                  | 3                                  | 2                         | 1          | 1       | 3       | Yes                                                |
| Alipanah 2018 (5)   | Self-administered<br>therapy                                | Drug                                  | Treatment<br>completion                   | Drug safety                                                                      | 3                                  | 2                         | 1          | 1       | 3       | Yes                                                |
| Alipanah 2018 (5)   | Self-administered<br>therapy                                | Drug                                  | All-cause<br>mortality                    | All-cause mortality                                                              | 3                                  | 2                         | 1          | 1       | 3       | Yes                                                |
| Anglemyer 2013 (6)  | Antiretroviral<br>therapy                                   | Drug                                  | HIV infection                             | Infectiological                                                                  | 2                                  | 2                         | 3          | 1       | 3       | Yes                                                |
| Azad 2017 (7)       | Nonnutritive<br>sweeteners                                  | Nutrition                             | Body Mass Index                           | Metabolic                                                                        | 2                                  | 2                         | 1          | 1       | 2       | Yes                                                |

|                            |                                                                          |           |                                    |                        |   |   |   |   |   |     |
|----------------------------|--------------------------------------------------------------------------|-----------|------------------------------------|------------------------|---|---|---|---|---|-----|
| Barnard 2015 (8)           | Surgical abortion by mid-level providers                                 | Invasive  | Failure or incomplete abortion     | Obstetrical            | 2 | 2 | 1 | 1 | 2 | Yes |
| Barnard 2015 (8)           | Surgical abortion by mid-level providers                                 | Invasive  | Complications                      | Obstetrical            | 2 | 2 | 1 | 1 | 2 | Yes |
| Barnard 2015 (8)           | Surgical abortion by mid-level providers                                 | Invasive  | Abortion failure and complications | Obstetrical            | 2 | 2 | 1 | 1 | 2 | Yes |
| Bellemain-Appaix 2012 (9)  | Clopidogrel pretreatment for percutaneous coronary intervention          | Drug      | All-cause mortality                | All-cause mortality    | 2 | 2 | 2 | 1 | 2 | Yes |
| Bellemain-Appaix 2012 (9)  | Clopidogrel pretreatment for percutaneous coronary intervention          | Drug      | Major bleeding                     | Drug safety            | 2 | 2 | 2 | 1 | 2 | Yes |
| Bellemain-Appaix 2012 (9)  | Clopidogrel pretreatment for percutaneous coronary intervention          | Drug      | Coronary heart disease             | Cardiovascular disease | 2 | 2 | 2 | 1 | 2 | Yes |
| Bellemain-Appaix 2014 (10) | P2Y12 inhibitor pretreatment in non-ST elevation acute coronary syndrome | Drug      | All-cause mortality                | All-cause mortality    | 2 | 2 | 2 | 1 | 2 | Yes |
| Bellemain-Appaix 2014 (10) | P2Y12 inhibitor pretreatment in non-ST elevation acute coronary syndrome | Drug      | Major bleeding                     | Drug safety            | 2 | 2 | 2 | 1 | 2 | Yes |
| Bellemain-Appaix 2014 (10) | P2Y12 inhibitor pretreatment in non-ST elevation acute coronary syndrome | Drug      | Main composite ischemic endpoint   | Cardiovascular disease | 2 | 2 | 2 | 1 | 2 | Yes |
| Bloomfield 2016 (11)       | Mediterranean diet                                                       | Nutrition | Breast cancer                      | Oncological            | 2 | 2 | 2 | 1 | 2 | Yes |

|                      |                               |           |                                                      |                        |   |   |   |   |   |     |
|----------------------|-------------------------------|-----------|------------------------------------------------------|------------------------|---|---|---|---|---|-----|
| Bolland 2015 (12)    | High calcium                  | Nutrition | All fractures                                        | Orthopaedic            | 1 | 2 | 1 | 1 | 2 | Yes |
| Bolland 2015 (12)    | High calcium                  | Nutrition | Vertebral fracture                                   | Orthopaedic            | 1 | 2 | 1 | 1 | 2 | Yes |
| Bolland 2015 (12)    | High calcium                  | Nutrition | Hip fracture                                         | Orthopaedic            | 1 | 2 | 1 | 1 | 2 | Yes |
| Brenner 2014 (13)    | Sigmoidoscopy                 | Invasive  | Colorectal cancer mortality                          | Oncological            | 1 | 1 | 1 | 1 | 1 | Yes |
| Brenner 2014 (13)    | Sigmoidoscopy                 | Invasive  | Colorectal cancer incidence                          | Oncological            | 1 | 1 | 1 | 2 | 2 | Yes |
| Chowdhury 2012 (14)  | High omega-3                  | Nutrition | Cerebrovascular disease                              | Cardiovascular disease | 2 | 2 | 1 | 1 | 2 | Yes |
| Chowdhury 2014a (15) | High $\alpha$ -linolenic acid | Nutrition | Coronary heart disease                               | Cardiovascular disease | 3 | 2 | 2 | 1 | 3 | Yes |
| Chowdhury 2014a (15) | High omega-3                  | Nutrition | Coronary heart disease                               | Cardiovascular disease | 3 | 2 | 2 | 1 | 3 | Yes |
| Chowdhury 2014a (15) | High omega-6                  | Nutrition | Coronary heart disease                               | Cardiovascular disease | 3 | 2 | 2 | 1 | 3 | Yes |
| Chowdhury 2014b (16) | High vitamin D                | Nutrition | All-cause mortality                                  | All-cause mortality    | 2 | 3 | 3 | 1 | 3 | No  |
| Chung 2011 (17)      | High vitamin D                | Nutrition | Colorectal cancer                                    | Oncological            | 2 | 3 | 3 | 1 | 3 | No  |
| Chung 2011 (17)      | High vitamin D                | Nutrition | Breast cancer                                        | Oncological            | 2 | 3 | 3 | 1 | 3 | No  |
| Chung 2016 (18)      | High calcium                  | Nutrition | Cardiovascular mortality                             | Cardiovascular disease | 2 | 2 | 1 | 1 | 2 | Yes |
| Ding 2017 (19)       | High dairy                    | Nutrition | Systolic blood pressure                              | Cardiovascular disease | 2 | 1 | 1 | 1 | 2 | Yes |
| Fenton 2018 (20)     | Radiation therapy             | Invasive  | Erectile dysfunction                                 | Urological             | 1 | 1 | 2 | 1 | 2 | Yes |
| Fenton 2018 (20)     | Radical Prostatectomy         | Invasive  | Urinary incontinence                                 | Urological             | 1 | 1 | 2 | 1 | 2 | Yes |
| Fenton 2018 (20)     | Radical Prostatectomy         | Invasive  | Erectile dysfunction                                 | Urological             | 1 | 1 | 2 | 1 | 2 | Yes |
| Filippini 2017 (21)  | Disease-modifying drugs       | Drug      | Conversion to clinically definite multiple sclerosis | Neurological           | 1 | 2 | 1 | 1 | 2 | Yes |



|                     |                                           |                 |                                   |                        |   |   |   |   |   |     |
|---------------------|-------------------------------------------|-----------------|-----------------------------------|------------------------|---|---|---|---|---|-----|
| Fluri 2010 (22)     | Extracranial-intracranial arterial bypass | Invasive        | All-cause mortality               | All-cause mortality    | 2 | 1 | 2 | 1 | 2 | Yes |
| Fluri 2010 (22)     | Extracranial-intracranial arterial bypass | Invasive        | Stroke                            | Cardiovascular disease | 2 | 1 | 2 | 1 | 2 | Yes |
| Fluri 2010 (22)     | Extracranial-intracranial arterial bypass | Invasive        | Stroke mortality or dependency    | Cardiovascular disease | 1 | 1 | 2 | 1 | 2 | Yes |
| Gargiulo 2016 (23)  | Transcatheter aortic valve implantation   | Invasive        | Early all-cause mortality         | All-cause mortality    | 2 | 2 | 1 | 1 | 2 | Yes |
| Gargiulo 2016 (23)  | Transcatheter aortic valve implantation   | Invasive        | Mid-term all-cause mortality      | All-cause mortality    | 2 | 2 | 1 | 1 | 2 | Yes |
| Gargiulo 2016 (23)  | Transcatheter aortic valve implantation   | Invasive        | Long-term all-cause mortality     | All-cause mortality    | 2 | 1 | 1 | 1 | 2 | Yes |
| Hartling 2013 (24)  | Treating gestational diabetes mellitus    | Nutrition       | High birth weight                 | Obstetrical            | 2 | 1 | 1 | 1 | 2 | Yes |
| Hartling 2013 (24)  | Treating gestational diabetes mellitus    | Nutrition       | Large-for-gestational age neonate | Obstetrical            | 2 | 1 | 1 | 1 | 2 | Yes |
| Hartling 2013 (24)  | Treating gestational diabetes mellitus    | Nutrition       | Shoulder dystocia                 | Obstetrical            | 2 | 1 | 1 | 1 | 2 | Yes |
| Henderson 2019 (25) | Treating asymptomatic bacteriuria         | Drug            | Pyelonephritis                    | Infectiological        | 2 | 2 | 3 | 1 | 3 | Yes |
| Higgins 2016 (26)   | Bacillus Calmette-Guérin vaccination      | Vaccine         | All-cause mortality               | All-cause mortality    | 3 | 1 | 2 | 1 | 3 | Yes |
| Higgins 2016 (26)   | Measles containing vaccines               | Vaccine         | All-cause mortality               | All-cause mortality    | 3 | 2 | 2 | 1 | 3 | Yes |
| Hopley 2010 (27)    | Total hip arthroplasty                    | Invasive        | Reoperation                       | Orthopaedic            | 2 | 1 | 1 | 1 | 2 | Yes |
| Hopley 2010 (27)    | Total hip arthroplasty                    | Invasive        | Dislocation                       | Orthopaedic            | 2 | 1 | 1 | 1 | 2 | Yes |
| Hopley 2010 (27)    | Total hip arthroplasty                    | Invasive        | Deep infection                    | Infectiological        | 2 | 2 | 1 | 1 | 2 | Yes |
| Hüpfel 2010 (28)    | Chest-compression-only cardiopulmonary    | Cardiopulmonary | Survival                          | All-cause mortality    | 1 | 3 | 3 | 1 | 3 | Yes |

|                     |                                                  |               |                          |                        |   |   |   |   |   |     |
|---------------------|--------------------------------------------------|---------------|--------------------------|------------------------|---|---|---|---|---|-----|
|                     | nary resuscitation                               | resuscitation |                          |                        |   |   |   |   |   |     |
| Jamal 2013 (29)     | Non-calcium-based phosphate binders              | Drug          | All-cause mortality      | All-cause mortality    | 2 | 2 | 1 | 1 | 2 | Yes |
| Jefferson 2010 (30) | Parenteral influenza vaccine                     | Vaccine       | Influenza-like illness   | Infectiological        | 2 | 2 | 3 | 1 | 3 | Yes |
| Jefferson 2010 (30) | Parenteral influenza vaccine                     | Vaccine       | Influenza                | Infectiological        | 2 | 2 | 1 | 1 | 2 | Yes |
| Jefferson 2012 (31) | Inactivated influenza vaccines                   | Vaccine       | Influenza                | Infectiological        | 1 | 2 | 1 | 1 | 2 | Yes |
| Jefferson 2012 (31) | Inactivated influenza vaccines                   | Vaccine       | Influenza-like illness   | Infectiological        | 1 | 2 | 1 | 1 | 2 | Yes |
| Jin 2012 (32)       | High total flavonoids                            | Nutrition     | Colorectal neoplasms     | Oncological            | 3 | 2 | 2 | 3 | 3 | Yes |
| Johnston 2019 (33)  | Red meat                                         | Nutrition     | All-cause mortality      | All-cause mortality    | 2 | 2 | 2 | 1 | 2 | No  |
| Johnston 2019 (33)  | Red meat                                         | Nutrition     | Cardiovascular mortality | Cardiovascular disease | 2 | 2 | 2 | 1 | 2 | No  |
| Johnston 2019 (33)  | Red meat                                         | Nutrition     | Cardiovascular disease   | Cardiovascular disease | 2 | 2 | 2 | 1 | 2 | No  |
| Kansagara 2013 (34) | Transfusion                                      | Transfusion   | All-cause mortality      | All-cause mortality    | 2 | 3 | 3 | 2 | 3 | Yes |
| Keag 2018 (35)      | Caesarean section                                | Invasive      | Urinary incontinence     | Obstetrical            | 3 | 2 | 2 | 1 | 3 | Yes |
| Keag 2018 (35)      | Caesarean section                                | Invasive      | Fecal incontinence       | Obstetrical            | 3 | 2 | 2 | 1 | 3 | Yes |
| Kredo 2014 (36)     | Antiretroviral therapy by nurses                 | Drug          | All-cause mortality      | All-cause mortality    | 2 | 3 | 1 | 1 | 3 | Yes |
| Kredo 2014 (36)     | Antiretroviral therapy by nurses                 | Drug          | Attrition                | Drug safety            | 2 | 3 | 1 | 1 | 3 | Yes |
| Kredo 2014 (36)     | Nurses for maintenance of antiretroviral therapy | Drug          | All-cause mortality      | All-cause mortality    | 2 | 3 | 2 | 1 | 3 | Yes |
| Li 2014 (37)        | Exenatide                                        | Drug          | Acute pancreatitis       | Drug safety            | 2 | 1 | 2 | 2 | 2 | Yes |
| Li 2016 (38)        | DDP-4 inhibitors                                 | Drug          | Heart failure            | Drug safety            | 2 | 2 | 2 | 1 | 2 | Yes |

|                         |                                                        |          |                                      |                        |   |   |   |   |   |     |
|-------------------------|--------------------------------------------------------|----------|--------------------------------------|------------------------|---|---|---|---|---|-----|
| Li 2016 (38)            | DDP-4 inhibitors                                       | Drug     | Hospital admission for heart failure | Drug safety            | 2 | 2 | 2 | 1 | 2 | Yes |
| Matthews 2018 (39)      | Tamoxifen                                              | Drug     | Heart failure                        | Drug safety            | 2 | 3 | 1 | 1 | 3 | Yes |
| Menne 2019 (40)         | SGLT-2 inhibitors                                      | Drug     | Acute kidney injury                  | Drug safety            | 2 | 2 | 2 | 1 | 2 | Yes |
| Mesgarpour 2017 (41)    | Erythropoiesis stimulating agents                      | Drug     | Venous thrombo-embolism              | Drug safety            | 2 | 2 | 2 | 1 | 2 | Yes |
| Mesgarpour 2017 (41)    | Erythropoiesis stimulating agents                      | Drug     | All-cause mortality                  | All-cause mortality    | 2 | 2 | 2 | 1 | 2 | Yes |
| Moberley 2013 (42)      | Pneumococcal polysaccharide vaccines                   | Vaccine  | Invasive pneumococcal disease        | Infectiological        | 2 | 2 | 1 | 1 | 2 | Yes |
| Molnar 2015 (43)        | Neoral (Cyclosporin)                                   | Drug     | Acute rejection of kidney transplant | Drug safety            | 2 | 1 | 2 | 1 | 2 | Yes |
| Navarese 2013 (44)      | Early intervention for NSTEMI-ACS                      | Invasive | All-cause mortality                  | All-cause mortality    | 2 | 2 | 1 | 1 | 2 | Yes |
| Navarese 2013 (44)      | Early intervention for NSTEMI-ACS                      | Invasive | Myocardial infarction                | Cardiovascular disease | 2 | 2 | 1 | 1 | 2 | Yes |
| Navarese 2013 (44)      | Early intervention for NSTEMI-ACS                      | Invasive | Major bleeding                       | Drug safety            | 2 | 2 | 1 | 1 | 2 | Yes |
| Nelson 2010 (45)        | Caesarean section                                      | Invasive | Anal incontinence, feces             | Obstetrical            | 3 | 2 | 2 | 1 | 3 | Yes |
| Nelson 2010 (45)        | Caesarean section                                      | Invasive | Anal incontinence, flatus            | Obstetrical            | 3 | 2 | 2 | 1 | 3 | Yes |
| Nieuwenhuijse 2014 (46) | Ceramic-on-ceramic bearings for total hip arthroplasty | Invasive | Harris Hip Score                     | Orthopaedic            | 2 | 1 | 1 | 1 | 2 | Yes |
| Nieuwenhuijse 2014 (46) | High-flexion total knee arthroplasty                   | Invasive | Flexion                              | Orthopaedic            | 2 | 1 | 1 | 1 | 2 | Yes |
| Nieuwenhuijse 2014 (46) | Gender-specific total knee arthroplasty                | Invasive | Flexion-extension range              | Orthopaedic            | 2 | 1 | 1 | 1 | 2 | Yes |
| Nikooie 2019 (47)       | Second generation antipsychotics                       | Drug     | Sedation                             | Drug safety            | 2 | 2 | 1 | 2 | 2 | Yes |

|                           |                                     |           |                                              |                        |   |   |   |   |   |     |
|---------------------------|-------------------------------------|-----------|----------------------------------------------|------------------------|---|---|---|---|---|-----|
| Nikooie 2019 (47)         | Second generation antipsychotics    | Drug      | Neurologic outcomes                          | Drug safety            | 2 | 2 | 1 | 2 | 2 | Yes |
| Ochen 2019 (48)           | Surgery for achilles tendon rupture | Invasive  | Re-rupture                                   | Orthopaedic            | 1 | 2 | 2 | 1 | 2 | Yes |
| Ochen 2019 (48)           | Surgery for achilles tendon rupture | Invasive  | Complications                                | Orthopaedic            | 1 | 2 | 2 | 1 | 2 | Yes |
| Pittas 2010 (49)          | High vitamin D                      | Nutrition | Hypertension                                 | Cardiovascular disease | 2 | 3 | 3 | 1 | 3 | Yes |
| Raman 2013 (50)           | Carotid endarterectomy              | Invasive  | Ipsilateral stroke                           | Cardiovascular disease | 2 | 1 | 2 | 1 | 2 | Yes |
| Raman 2013 (50)           | Carotid endarterectomy              | Invasive  | Stroke                                       | Cardiovascular disease | 2 | 1 | 2 | 1 | 2 | Yes |
| Raman 2013 (50)           | Carotid artery stenting             | Invasive  | Periprocedural stroke                        | Cardiovascular disease | 2 | 2 | 2 | 1 | 2 | Yes |
| Schweizer 2013 (51)       | Nasal deconolization                | Drug      | Surgical site infection                      | Infectiological        | 2 | 2 | 1 | 1 | 2 | Yes |
| Schweizer 2013 (51)       | Glycopeptide prophylaxis            | Drug      | Surgical site infection                      | Infectiological        | 2 | 2 | 2 | 1 | 2 | Yes |
| Silvain 2012 (52)         | Enoxaparin                          | Drug      | All-cause mortality                          | All-cause mortality    | 2 | 1 | 2 | 1 | 2 | Yes |
| Silvain 2012 (52)         | Enoxaparin                          | Drug      | Major bleeding                               | Drug safety            | 2 | 1 | 2 | 1 | 2 | Yes |
| Silvain 2012 (52)         | Enoxaparin                          | Drug      | All-cause mortality or myocardial infarction | Cardiovascular disease | 2 | 1 | 2 | 1 | 2 | Yes |
| Suthar 2012 (53)          | Antiretroviral therapy              | Drug      | Tuberculosis infection                       | Infectiological        | 2 | 3 | 3 | 1 | 3 | Yes |
| Te Morenga 2013 (54)      | High sugar intake                   | Nutrition | Weight gain                                  | Metabolic              | 2 | 1 | 2 | 1 | 2 | Yes |
| Te Morenga 2013 (54)      | High sugar intake                   | Nutrition | Body Mass Index                              | Metabolic              | 2 | 2 | 2 | 1 | 2 | Yes |
| Thomas 2010 (55)          | Influenza vaccines                  | Vaccine   | Influenza-like illness                       | Infectiological        | 2 | 3 | 3 | 1 | 3 | Yes |
| Tickell-Painter 2017 (56) | Mefloquine                          | Drug      | Discontinuation due to adverse effects       | Drug safety            | 2 | 1 | 1 | 1 | 2 | Yes |

|                           |                                                                                       |                  |                                   |                        |   |   |   |   |   |     |
|---------------------------|---------------------------------------------------------------------------------------|------------------|-----------------------------------|------------------------|---|---|---|---|---|-----|
| Tickell-Painter 2017 (56) | Mefloquine                                                                            | Drug             | Serious adverse events or effects | Drug safety            | 3 | 1 | 1 | 2 | 3 | Yes |
| Tickell-Painter 2017 (56) | Mefloquine                                                                            | Drug             | Nausea                            | Drug safety            | 3 | 1 | 1 | 1 | 3 | Yes |
| Tricco 2018 (57)          | Live-attenuated zoster vaccines                                                       | Vaccine          | Suspected Herpes Zoster           | Infectiological        | 2 | 2 | 2 | 1 | 2 | Yes |
| Vinceti 2018 (58)         | High selenium                                                                         | Nutrition        | Cancer                            | Oncological            | 2 | 3 | 3 | 2 | 3 | Yes |
| Vinceti 2018 (58)         | High selenium                                                                         | Nutrition        | Cancer mortality                  | Oncological            | 2 | 3 | 3 | 1 | 3 | Yes |
| Vinceti 2018 (58)         | High selenium                                                                         | Nutrition        | Colorectal cancer                 | Oncological            | 2 | 3 | 3 | 1 | 3 | Yes |
| Wilson 2011 (59)          | Training for traditional birth attendants/ assistance by traditional birth attendants | Birth assistance | Perinatal mortality               | All-cause mortality    | 1 | 2 | 3 | 1 | 3 | Yes |
| Wilson 2011 (59)          | Training for traditional birth attendants/ assistance by traditional birth attendants | Birth assistance | Neonatal mortality                | All-cause mortality    | 1 | 2 | 3 | 1 | 3 | Yes |
| Wilson 2019 (60)          | Unicompartmental knee arthroplasty                                                    | Invasive         | Venous thrombo-embolism           | Orthopaedic            | 2 | 1 | 1 | 1 | 2 | Yes |
| Wilson 2019 (60)          | Unicompartmental knee arthroplasty                                                    | Invasive         | Flexion-extension range           | Orthopaedic            | 2 | 1 | 1 | 1 | 2 | Yes |
| Wilson 2019 (60)          | Unicompartmental knee arthroplasty                                                    | Invasive         | Operation duration                | Orthopaedic            | 2 | 1 | 1 | 1 | 2 | Yes |
| Yank 2011 (61)            | Recombinant factor VII                                                                | Drug             | All-cause mortality               | All-cause mortality    | 2 | 2 | 1 | 1 | 2 | Yes |
| Yank 2011 (61)            | Recombinant factor VII                                                                | Drug             | Thrombo-embolism                  | Drug safety            | 2 | 2 | 1 | 1 | 2 | Yes |
| Zhang 2016 (62)           | Everolimus-eluting bioresorbable vascular scaffold                                    | Invasive         | Stent thrombosis                  | Cardiovascular disease | 2 | 1 | 1 | 1 | 2 | Yes |

|                 |                                                    |          |                                  |                        |   |   |   |   |   |     |
|-----------------|----------------------------------------------------|----------|----------------------------------|------------------------|---|---|---|---|---|-----|
| Zhang 2016 (62) | Everolimus-eluting bioresorbable vascular scaffold | Invasive | All-cause mortality              | All-cause mortality    | 2 | 1 | 1 | 1 | 2 | Yes |
| Zhang 2016 (62) | Everolimus-eluting bioresorbable vascular scaffold | Invasive | Coronary heart disease mortality | Cardiovascular disease | 2 | 1 | 1 | 1 | 2 | Yes |
| Zhang 2017 (63) | Percutaneous coronary intervention                 | Invasive | All-cause mortality              | All-cause mortality    | 2 | 2 | 1 | 1 | 2 | Yes |
| Zhang 2017 (63) | Percutaneous coronary intervention                 | Invasive | Cardiovascular mortality         | Cardiovascular disease | 2 | 2 | 1 | 1 | 2 | Yes |
| Zhang 2017 (63) | Percutaneous coronary intervention                 | Invasive | Myocardial infarction            | Cardiovascular disease | 2 | 2 | 1 | 1 | 2 | Yes |
| Ziff 2015 (64)  | Digoxin                                            | Drug     | All-cause mortality              | All-cause mortality    | 3 | 1 | 1 | 1 | 3 | Yes |
| Ziff 2015 (64)  | Digoxin                                            | Drug     | Cardiovascular mortality         | Cardiovascular disease | 3 | 1 | 1 | 1 | 3 | Yes |
| Ziff 2015 (64)  | Digoxin                                            | Drug     | Hospital admission               | Drug safety            | 2 | 1 | 1 | 1 | 2 | Yes |

DDP 4: Dipeptidylpeptidase-4; DHA and EPA: Docosahexaenoic acid and eicosapentaenoic acid; HIV: human immunodeficiency virus; NSTEMI-ACS: Non-ST-Segment Elevation Acute Coronary Syndromes; PI/ECO: population – intervention/exposure – comparator – outcome ; SGLT-2: Sodium dependent glucose transporter 2.

**Table S3:** Differences between published (reported) effect estimates and re-calculated effect estimates

| Reference                 | Intervention / Exposure<br>(as defined by the authors)          | Outcome<br>(as defined by the authors) | RCTs                       |                                                 | Cohort Studies             |                                                 |
|---------------------------|-----------------------------------------------------------------|----------------------------------------|----------------------------|-------------------------------------------------|----------------------------|-------------------------------------------------|
|                           |                                                                 |                                        | Reported*                  | Recalculated<br>(RE and inverse-variance model) | Reported*                  | Recalculated<br>(RE and inverse-variance model) |
|                           |                                                                 |                                        | RR/HR/OR or MD<br>(95% CI) | RR/HR/OR or MD<br>(95% CI)                      | RR/HR/OR or MD<br>(95% CI) | RR/HR/OR or MD<br>(95% CI)                      |
| Aburto 2013 (2)           | Low sodium                                                      | Cardiovascular disease                 | -                          | -                                               | RR: 0.89 (0.75, 1.08)      | RR: 0.90 (0.75, 1.08)                           |
| Ahmad 2015 (3)            | Intra-aortic balloon pump                                       | Mortality                              | -                          | -                                               | -                          | OR: 1.02 (0.67, 1.56) <sup>1</sup>              |
| Alipanah 2018 (5)         | Self-administered therapy                                       | Treatment success                      | -                          | RR: 0.95 (0.87, 1.03) <sup>1</sup>              | RR: 0.81 (0.73, 0.89)      | RR: 0.81 (0.74, 0.88)                           |
| Alipanah 2018 (5)         | Self-administered therapy                                       | Treatment completion                   | RR: 0.79 (0.56, 1.11)      | RR: 0.79 (0.57, 1.09)                           | RR: 1.10 (0.90, 1.35)      | RR: 1.10 (0.91, 1.33)                           |
| Alipanah 2018 (5)         | Self-administered therapy                                       | Mortality                              | -                          | -                                               | RR: 1.35 (1.00, 1.84)      | RR: 1.35 (1.00, 1.83)                           |
| Anglemyer 2013 (6)        | Antiretroviral therapy                                          | HIV Infection                          | RR: 0.11 (0.04, 0.32)      | RR: 0.11 (0.04, 0.30)                           | RR: 0.58 (0.35, 0.96)      | RR: 0.59 (0.36, 0.97)                           |
| Barnard 2015 (8)          | Surgical abortion by mid-level providers                        | Failure or incomplete abortion         | RR: 2.97 (0.21, 41.82)     | RR: 2.84 (0.24, 32.97)                          | -                          | RR: 2.47 (1.44, 4.23) <sup>1</sup>              |
| Barnard 2015 (8)          | Surgical abortion by mid-level providers                        | Complications                          | RR: 0.99 (0.17, 5.7)       | RR: 0.94 (0.14, 6.44)                           | -                          | RR: 1.30 (0.57, 2.96) <sup>1</sup>              |
| Barnard 2015 (8)          | Surgical abortion by mid-level providers                        | Abortion failure and complications     | RR: 3.07 (0.16, 59.08)     | RR: 2.93 (0.19, 44.15)                          | -                          | RR: 1.33 (0.78, 2.27) <sup>1</sup>              |
| Bellemain-Appaix 2012 (9) | Clopidogrel pretreatment for percutaneous coronary intervention | All-cause mortality                    | OR: 0.80 (0.57, 1.11)      | OR: 0.80 (0.58, 1.10)                           | -                          | OR: 0.79 (0.53, 1.18) <sup>2</sup>              |
| Bellemain-Appaix 2012 (9) | Clopidogrel pretreatment for percutaneous coronary intervention | Major bleeding                         | -                          | -                                               | -                          | OR: 1.03 (0.69, 1.53) <sup>2</sup>              |

|                            |                                                                          |                                  |                       |                                    |                       |                                    |
|----------------------------|--------------------------------------------------------------------------|----------------------------------|-----------------------|------------------------------------|-----------------------|------------------------------------|
| Bellemain-Appaix 2012 (9)  | Clopidogrel pretreatment for percutaneous coronary intervention          | Coronary heart disease           | -                     | -                                  | -                     | OR: 0.76 (0.60, 0.95) <sup>2</sup> |
| Bellemain-Appaix 2014 (10) | P2Y12 inhibitor pretreatment in non-ST elevation acute coronary syndrome | All-cause mortality              | OR: 0.92 (0.43, 1.98) | OR: 0.90 (0.71, 1.14)              | -                     | OR: 0.69 (0.35, 1.32) <sup>2</sup> |
| Bellemain-Appaix 2014 (10) | P2Y12 inhibitor pretreatment in non-ST elevation acute coronary syndrome | Major bleeding                   | OR: 1.45 (0.97, 2.15) | OR: 1.43 (1.16, 1.76)              | -                     | OR: 1.13 (0.92, 1.39) <sup>2</sup> |
| Bellemain-Appaix 2014 (10) | P2Y12 inhibitor pretreatment in non-ST elevation acute coronary syndrome | Main composite ischemic endpoint | OR: 0.85 (0.67, 1.07) | OR: 0.87 (0.73, 1.04)              | -                     | OR: 0.78 (0.56, 1.08)              |
| Bolland 2015 (12)          | High-calcium                                                             | All fractures                    | RR: 0.90 (0.83, 0.96) | RR: 0.90 (0.83, 0.97)              | -                     | RR: 1.02 (0.93, 1.12)              |
| Bolland 2015 (12)          | High-calcium                                                             | Vertebral fracture               | -                     | -                                  | RR: 1.40 (1.10, 1.90) | RR: 1.40 (1.10, 1.78)              |
| Bolland 2015 (12)          | High-calcium                                                             | Hip fracture                     | -                     | -                                  | -                     | RR: 1.09 (0.91, 1.30) <sup>3</sup> |
| Brenner 2014 (13)          | Sigmoidoscopy                                                            | Colorectal cancer mortality      | -                     | -                                  | RR: 0.59 (0.45, 0.76) | RR: 0.59 (0.45, 0.77)              |
| Brenner 2014 (13)          | Sigmoidoscopy                                                            | Colorectal cancer incidence      | RR: 0.82 (0.75, 0.89) | RR: 0.82 (0.75, 0.90)              | -                     | RR: 0.50 (0.37, 0.67) <sup>1</sup> |
| Chowdhury 2012 (14)        | High omega-3                                                             | Cerebrovascular disease          | RR: 0.98 (0.89, 1.08) | RR: 0.99 (0.90, 1.08)              | RR: 0.90 (0.80, 1.01) | RR: 0.89 (0.89, 0.99)              |
| Chowdhury 2014a (15)       | High $\alpha$ -linolenic acid                                            | Coronary heart disease           | -                     | -                                  | RR: 0.99 (0.86, 1.14) | RR: 0.99 (0.87, 1.13)              |
| Chung 2016 (18)            | High calcium                                                             | Cardiovascular mortality         | -                     | RR: 1.05 (0.82, 1.33) <sup>3</sup> | -                     | RR: 0.97 (0.86, 1.09)              |



|                     |                                           |                                                      |                       |                                    |                                    |                                      |
|---------------------|-------------------------------------------|------------------------------------------------------|-----------------------|------------------------------------|------------------------------------|--------------------------------------|
| Fenton 2018 (20)    | Radiation therapy                         | Erectile dysfunction                                 | -                     | -                                  | -                                  | RR: 1.30 (1.19, 1.43) <sup>1</sup>   |
| Fenton 2018 (20)    | Radical Prostatectomy                     | Urinary incontinence                                 | RR: 2.27 (1.82, 2.84) | RR: 2.25 (1.80, 2.82)              | -                                  | RR: 2.91 (1.80, 4.71) <sup>1</sup>   |
| Fenton 2018 (20)    | Radical Prostatectomy                     | Erectile dysfunction                                 | RR: 1.60 (1.23, 2.07) | RR: 1.60 (1.24, 2.07)              | -                                  | RR: 1.49 (1.33, 1.66) <sup>1</sup>   |
| Filippini 2017 (21) | Disease-modifying drugs                   | Conversion to clinically definite multiple sclerosis | -                     | HR: 0.52 (0.46, 0.60) <sup>4</sup> | -                                  | HR: 0.48 (0.30, 0.78) <sup>4</sup>   |
| Fluri 2010 (22)     | Extracranial-intracranial arterial bypass | Mortality                                            | -                     | -                                  | -                                  | OR: 0.97 (0.58, 1.62) <sup>1,7</sup> |
| Fluri 2010 (22)     | Extracranial-intracranial arterial bypass | Any stroke                                           | -                     | OR: 0.44 (0.06, 3.24) <sup>7</sup> | -                                  | OR: 0.76 (0.49, 1.17) <sup>1,7</sup> |
| Fluri 2010 (22)     | Extracranial-intracranial arterial bypass | Death or dependency                                  | -                     | -                                  | OR: 0.80 (0.50, 1.29) <sup>7</sup> | OR: 0.81 (0.50, 1.31) <sup>7</sup>   |
| Gargiulo 2016 (23)  | Transcatheter aortic valve implantation   | Early mortality                                      | OR: 0.80 (0.51, 1.25) | OR: 0.80 (0.58, 1.11)              | -                                  | OR: 1.08 (0.84, 1.39) <sup>1</sup>   |
| Gargiulo 2016 (23)  | Transcatheter aortic valve implantation   | Mid-term mortality                                   | OR: 0.90 (0.64, 1.26) | OR: 0.90 (0.71, 1.13)              | -                                  | -                                    |
| Gargiulo 2016 (23)  | Transcatheter aortic valve implantation   | Long-term mortality                                  | OR: 1.03 (0.65, 1.62) | OR: 1.03 (0.77, 1.37)              | OR: 1.70 (1.23, 2.35)              | OR: 1.70 (1.31, 2.20)                |
| Hartling 2013 (24)  | Treating Gestational Diabetes Mellitus    | Birth weight > 4000g                                 | -                     | -                                  | -                                  | RR: 0.69 (0.31, 1.54) <sup>3</sup>   |
| Hartling 2013 (24)  | Treating Gestational Diabetes Mellitus    | Shoulder dystocia                                    | -                     | -                                  | RR: 0.38 (0.19, 0.78)              | RR: 0.38 (0.18, 0.80)                |
| Henderson 2019 (25) | Treating asymptomatic bacteriuria         | Pyelonephritis                                       | -                     | -                                  | -                                  | RR: 0.29 (0.15, 0.57) <sup>3</sup>   |
| Higgins 2016 (26)   | Bacillus Calmette-Guérin vaccination      | Mortality                                            | -                     | RR: 0.67 (0.40, 1.14) <sup>1</sup> | -                                  | -                                    |
| Higgins 2016 (26)   | Measles containing vaccines               | Mortality                                            | -                     | -                                  | -                                  | RR: 0.53 (0.40, 0.70) <sup>1</sup>   |
| Hopley 2010 (27)    | Total hip arthroplasty                    | Reoperation                                          | -                     | -                                  | -                                  | RR: 0.45 (0.19, 1.08) <sup>1</sup>   |

|                      |                                     |                                                         |                        |                        |                       |                                    |
|----------------------|-------------------------------------|---------------------------------------------------------|------------------------|------------------------|-----------------------|------------------------------------|
| Hopley 2010 (27)     | Total hip arthroplasty              | Dislocation                                             | -                      | -                      | -                     | RR: 0.79 (0.27, 2.35) <sup>1</sup> |
| Jamal 2013 (29)      | Non-calcium-based phosphate binders | Mortality                                               | RR: 0.78 (0.61, 0.98)  | RR: 0.78 (0.62, 0.98)  | -                     | -                                  |
| Jefferson 2010 (30)  | Parenteral influenza vaccine        | Influenza-like illness                                  | -                      | -                      | -                     | RR: 0.76 (0.66, 0.87) <sup>3</sup> |
| Jefferson 2010 (30)  | Parenteral influenza vaccine        | Influenza                                               | -                      | -                      | -                     | RR: 0.51 (0.27, 0.97) <sup>3</sup> |
| Jefferson 2012 (31)  | Inactivated influenza vaccines      | Influenza                                               | -                      | -                      | -                     | RR: 0.20 (0.10, 0.39) <sup>1</sup> |
| Jefferson 2012 (31)  | Inactivated influenza vaccines      | Influenza-like illness                                  | -                      | -                      | -                     | RR: 0.29 (0.07, 1.15) <sup>1</sup> |
| Kansagara 2013 (34)  | Transfusion                         | Mortality                                               | RR: 0.94 (0.61, 1.42)  | RR: 0.94 (0.62, 1.43)  | -                     | RR: 2.49 (1.40, 4.43) <sup>1</sup> |
| Keag 2018 (35)       | Caesarean section                   | Urinary incontinence                                    | -                      | -                      | OR: 0.56 (0.47, 0.66) | OR: 0.56 (0.48, 0.66)              |
| Keag 2018 (35)       | Caesarean section                   | Fecal incontinence                                      | OR: 3.07 (0.90, 10.49) | OR: 3.07 (0.90, 10.47) | -                     | -                                  |
| Li 2014 (37)         | Exenatide                           | Acute pancreatitis/<br>Admission for acute pancreatitis | RR: 0.86 (0.22, 3.37)  | RR: 0.86 (0.22, 3.39)  | -                     | RR: 0.92 (0.69, 1.22) <sup>3</sup> |
| Li 2016 (38)         | DDP-4 Inhibitors                    | Heart failure                                           | RR: 0.90 (0.61, 1.35)  | RR: 0.95 (0.60, 1.50)  | -                     | RR: 1.10 (1.04, 1.17) <sup>3</sup> |
| Matthews 2018 (39)   | Tamoxifen                           | Heart failure                                           | RR: 0.52 (0.33, 0.71)  | RR: 0.52 (0.33, 0.79)  | RR: 0.84 (0.65, 1.07) | RR: 0.85 (0.66, 1.09)              |
| Menne 2019 (40)      | SGLT-2 inhibitors                   | Acute kidney injury                                     | -                      | -                      | OR: 0.40 (0.33, 0.48) | OR: 0.40 (0.31, 0.52)              |
| Mesgarpour 2017 (41) | Erythropoiesis stimulating agents   | Venous thromboembolism                                  | -                      | -                      | RR: 1.87 (0.59, 5.92) | RR: 1.92 (0.64, 5.76)              |
| Mesgarpour 2017 (41) | Erythropoiesis stimulating agents   | Mortality                                               | RR: 0.81 (0.71, 0.93)  | RR: 0.82 (0.71, 0.93)  | RR: 1.07 (0.65, 1.77) | RR: 1.08 (0.66, 1.78)              |
| Molnar 2015 (43)     | Neoral (cyclosporine)               | Acute rejection of kidney transplant                    | OR: 1.23 (0.64, 2.36)  | OR: 1.25 (0.61, 2.56)  | -                     | OR: 0.46 (0.25, 0.86) <sup>1</sup> |

|                         |                                                        |                                   |                       |                                       |                       |                                        |
|-------------------------|--------------------------------------------------------|-----------------------------------|-----------------------|---------------------------------------|-----------------------|----------------------------------------|
| Navarese 2013 (44)      | Early intervention for NSTEMI-ACS                      | Myocardial infarction             | OR: 1.15 (0.65, 2.01) | OR: 1.16 (0.67, 2.00)                 | -                     | -                                      |
| Nelson 2010 (45)        | Caesarean section                                      | Anal incontinence, feces          | -                     | -                                     | -                     | OR: 0.91 (0.72, 1.16) <sup>1</sup>     |
| Nelson 2010 (45)        | Caesarean section                                      | Anal incontinence, flatus         | -                     | -                                     | -                     | OR: 1.02 (0.87, 1.20) <sup>1</sup>     |
| Nieuwenhuijse 2014 (46) | Ceramic-on-ceramic bearings for total hip arthroplasty | Harris Hip Score                  | -                     | MD: -0.23 (-1.09, 0.63) <sup>4</sup>  | -                     | MD: -0.50 (-2.09, 1.09) <sup>1,4</sup> |
| Nieuwenhuijse 2014 (46) | High-flexion total knee arthroplasty                   | Flexion (degrees)                 | -                     | MD: 1.68 (0.28, 3.08) <sup>4</sup>    | -                     | MD: 3.78 (1.64, 5.92) <sup>1,4</sup>   |
| Nieuwenhuijse 2014 (46) | Gender-specific total knee arthroplasty                | Flexion-extension range (degrees) | -                     | MD: 1.40 (-0.18, 2.99) <sup>1,4</sup> | -                     | MD: 3.15 (-0.03, 6.34) <sup>1,4</sup>  |
| Nikooie 2019 (47)       | Second generation antipsychotics                       | Sedation                          | -                     | -                                     | -                     | RR: 1.84 (0.40, 8.54) <sup>3</sup>     |
| Nikooie 2019 (47)       | Second generation antipsychotics                       | Neurologic outcomes               | -                     | -                                     | -                     | RR: 0.76 (0.59, 0.99) <sup>3</sup>     |
| Ochen 2019 (48)         | Surgery for achilles tendon rupture                    | Re-rupture                        | -                     | -                                     | RR: 0.42 (0.28, 0.64) | RR: 0.42 (0.28, 0.65)                  |
| Ochen 2019 (48)         | Surgery for achilles tendon rupture                    | Complications                     | RR: 3.26 (1.26, 8.41) | RR: 3.13 (1.33, 7.38)                 | -                     | -                                      |
| Raman 2013 (50)         | Carotid endarterectomy                                 | Ipsilateral stroke                | -                     | -                                     | -                     | RR: 0.47 (0.05, 4.46) <sup>1</sup>     |
| Raman 2013 (50)         | Carotid endarterectomy                                 | Any stroke                        | -                     | -                                     | -                     | RR: 0.73 (0.43, 1.22) <sup>1</sup>     |
| Raman 2013 (50)         | Carotid artery stenting                                | Periprocedural stroke             | -                     | RR: 1.75 (0.87, 3.52) <sup>3</sup>    | -                     | RR: 1.91 (1.72, 2.11) <sup>1</sup>     |
| Schweizer 2013 (51)     | Nasal deconolization                                   | Surgical site infection           | RR: 0.63 (0.63, 1.13) | RR: 0.63 (0.36, 1.12)                 | -                     | RR: 0.40 (0.28, 0.57) <sup>1</sup>     |
| Schweizer 2013 (51)     | Glycopeptide prophylaxis                               | Surgical site infection           | -                     | -                                     | RR: 0.34 (0.11, 1.10) | RR: 0.35 (0.12, 1.03)                  |
| Silvain 2012 (52)       | Enoxaparin                                             | Mortality                         | -                     | RR: 0.88 (0.70, 1.10) <sup>4</sup>    | -                     | RR: 0.50 (0.40, 0.62) <sup>1,4</sup>   |

|                           |                                                                                       |                                        |                       |                                      |                        |                                         |
|---------------------------|---------------------------------------------------------------------------------------|----------------------------------------|-----------------------|--------------------------------------|------------------------|-----------------------------------------|
| Silvain 2012 (52)         | Enoxaparin                                                                            | Major bleeding                         | -                     | RR: 0.88 (0.62, 1.24) <sup>4</sup>   |                        | RR: 0.72 (0.56, 0.93) <sup>1,4</sup>    |
| Silvain 2012 (52)         | Enoxaparin                                                                            | Death or Myocardial infarction         | -                     | RR: 0.86 (0.74, 0.99) <sup>4</sup>   |                        | RR: 0.44 (0.35, 0.55) <sup>1,4</sup>    |
| Suthar 2012 (53)          | Antiretroviral therapy                                                                | Tuberculosis infection                 | -                     | HR: 0.50 (0.34, 0.75) <sup>1</sup>   | -                      | -                                       |
| Te Morenga 2013 (54)      | High sugar intake                                                                     | Weight gain (kg)                       | MD: 0.75 (0.30, 1.19) | MD: 0.74 (0.30, 1.19)                | -                      | -                                       |
| Te Morenga 2013 (54)      | High sugar intake                                                                     | Body Mass Index (kg/m <sup>2</sup> )   | -                     | MD: -0.06 (-0.15, 0.04) <sup>1</sup> | -                      | -                                       |
| Tickell-Painter 2017 (56) | Mefloquine                                                                            | Discontinuation due to adverse effects | -                     | -                                    | RR: 2.73 (1.83, 4.08)  | RR: 2.73 (1.84, 4.06)                   |
| Tickell-Painter 2017 (56) | Mefloquine                                                                            | Serious adverse events or effects      | RR: 0.70 (0.14, 3.53) | RR: 0.68 (0.11, 4.27)                | RR: 3.08 (0.39, 24.11) | RR: 3.09 (0.38, 24.95)                  |
| Tickell-Painter 2017 (56) | Mefloquine                                                                            | Nausea                                 | RR: 1.35 (1.05, 1.73) | RR: 1.34 (1.04, 1.71)                | RR: 1.85 (1.42, 2.43)  | RR: 1.86 (1.42, 2.42)                   |
| Tricco 2018 (57)          | Live-attenuated zoster vaccines                                                       | Suspected Herpes Zoster                | RR: 0.61 (0.48, 0.93) | RR: 0.60 (0.54, 0.66)                | RR: 0.48 (0.27, 0.84)  | RR: 0.48 (0.27, 0.83) <sup>5</sup>      |
| Wilson 2011 (59)          | Training for traditional birth attendants/ assistance by traditional birth attendants | Perinatal mortality                    | RR: 0.76 (0.64, 0.88) | RR: 0.77 (0.66, 0.89)                | -                      | RR: 0.82 (0.38, 1.78) <sup>1</sup>      |
| Wilson 2011 (59)          | Training for traditional birth attendants/ assistance by traditional birth attendants | Neonatal mortality                     | RR: 0.79 (0.69, 0.88) | RR: 0.80 (0.71, 0.90)                | -                      | RR: 0.80 (0.47, 1.37) <sup>1</sup>      |
| Wilson 2019 (60)          | Unilateral knee arthroplasty                                                          | Venous thromboembolism                 | -                     | -                                    | -                      | RR: 0.42 (0.30, 0.57) <sup>1</sup>      |
| Wilson 2019 (60)          | Unilateral knee arthroplasty                                                          | Range of movement (degrees)            | -                     | -                                    | -                      | MD: -8.43 (-10.15, -6.71) <sup>1</sup>  |
| Wilson 2019 (60)          | Unilateral knee arthroplasty                                                          | Operation duration (minutes)           | -                     | -                                    | -                      | MD: -23.80 (-40.43, -1.17) <sup>1</sup> |

|                 |                                                    |                          |                                    |                                      |                                    |                                      |
|-----------------|----------------------------------------------------|--------------------------|------------------------------------|--------------------------------------|------------------------------------|--------------------------------------|
| Yank 2011 (61)  | Recombinant factor VII                             | Mortality                | -                                  | RR: 1.40 (0.49, 4.02) <sup>4,6</sup> | -                                  | RR: 0.91 (0.39, 2.12) <sup>4,6</sup> |
| Yank 2011 (61)  | Recombinant factor VII                             | Thromboembolic events    | -                                  | RR: 2.04 (0.51, 8.84) <sup>4,6</sup> | -                                  | RR: 1.81 (0.67, 4.87) <sup>4,6</sup> |
| Zhang 2016 (62) | Everolimus-eluting bioresorbable vascular scaffold | Stent thrombosis         | OR: 2.05 (0.95, 4.43) <sup>7</sup> | OR: 1.97 (0.90, 4.29)                | OR: 2.32 (1.06, 5.07) <sup>7</sup> | OR: 2.22 (1.00, 4.93)                |
| Zhang 2016 (62) | Everolimus-eluting bioresorbable vascular scaffold | Mortality                | OR: 0.96 (0.46, 2.00) <sup>7</sup> | OR: 0.71 (0.17, 3.01)                | OR: 0.57 (0.23, 1.44) <sup>7</sup> | OR: 0.63 (0.24, 1.63)                |
| Zhang 2016 (62) | Everolimus-eluting bioresorbable vascular scaffold | Cardiac death            | OR: 1.40 (0.45, 4.33) <sup>7</sup> | OR: 1.39 (0.17, 11.14)               | OR: 0.81 (0.38, 1.70) <sup>7</sup> | OR: 0.94 (0.43, 2.06)                |
| Zhang 2017 (63) | Percutaneous coronary intervention                 | Mortality                | -                                  | -                                    | HR: 1.08 (0.92, 1.26)              | HR: 1.07 (0.92, 1.26)                |
| Zhang 2017 (63) | Percutaneous coronary intervention                 | Cardiovascular mortality | HR: 1.00 (0.72, 1.39)              | HR: 0.99 (0.71, 1.39)                | HR: 1.08 (0.51, 2.29)              | HR: 1.08 (0.51, 2.28)                |
| Zhang 2017 (63) | Percutaneous coronary intervention                 | Myocardial infarction    | HR: 1.39 (0.85, 2.27)              | HR: 1.39 (0.86, 2.26)                | HR: 2.01 (1.64, 2.45)              | HR: 2.00 (1.65, 2.44)                |
| Ziff 2015 (64)  | Digoxin                                            | Mortality                | -                                  | -                                    | RR: 1.61 (1.31, 1.97)              | RR: 1.60 (1.31, 1.96)                |
| Ziff 2015 (64)  | Digoxin                                            | Cardiovascular mortality | RR: 1.01 (0.94, 1.08)              | RR: 1.01 (0.94, 1.09)                | RR: 2.53 (1.12, 5.71)              | RR: 2.53 (1.12, 5.70)                |
| Ziff 2015 (64)  | Digoxin                                            | Hospital admission       | RR: 0.94 (0.90, 0.99)              | RR: 0.96 (0.87, 1.05)                | RR: 0.91 (0.87, 0.95)              | RR: 0.92 (0.85, 0.99)                |

CI: confidence interval; DDP 4: Dipeptidylpeptidase-4; HIV: human immunodeficiency virus; HR: hazard ratio; MD: mean difference; NSTE-ACS: Non-ST-Segment Elevation Acute Coronary Syndromes; OR: odds ratio; RCT: randomized controlled trial; RE: random effects; RR: risk ratio; SGLT-2: Sodium dependent glucose transporter 2. \*some estimates were converted (detailed description is reported elsewhere (65)).

<sup>1</sup> Only re-calculated data is shown since we excluded some primary studies from the original estimate due to inappropriate study design.

<sup>2</sup> Pooled estimate includes observational analysis of randomized controlled trials.

<sup>3</sup> Primary studies were not pooled in the original paper.

<sup>4</sup> In the original paper cohort studies and randomized controlled trials were pooled together (sometimes without a subgroup).

<sup>5</sup> Re-analysis with unpublished data.

<sup>6</sup> Data converted (risk difference to risk ratio).

<sup>7</sup> In the original paper common effects were reported, we calculated estimates with random effects model.

**Table S4:** Reason for exclusion from the pooling scenario

| <b>Systematic Review</b> | <b>Intervention/Exposure</b>                        | <b>Outcome</b>                               | <b>Reason for exclusion</b>                  |
|--------------------------|-----------------------------------------------------|----------------------------------------------|----------------------------------------------|
| Abou-Setta 2011 (1)      | Nerve block                                         | Delirium (OR)                                | Forest plots not available                   |
| Abou-Setta 2011 (1)      | Spinal anaesthesia                                  | Mortality (OR)                               | Forest plots not available                   |
| Alexander 2017 (4)       | High docosahexaenoic acid and eicosapentaenoic acid | Any coronary heart disease event (RR)        | Forest plots not available                   |
| Alexander 2017 (4)       | High docosahexaenoic acid and eicosapentaenoic acid | Fatal coronary heart disease events (RR)     | Forest plots not available                   |
| Alexander 2017 (4)       | High docosahexaenoic acid and eicosapentaenoic acid | Non-fatal coronary heart disease events (RR) | Forest plots not available                   |
| Chowdhury 2014b (16)     | High vitamin D                                      | Mortality (RR)                               | Forest plot not available for RCTs           |
| Chung 2011 (17)          | High vitamin D                                      | Colorectal cancer (RR)                       | Forest plots not available                   |
| Chung 2011 (17)          | High vitamin D                                      | Breast cancer (RR)                           | Forest plots not available                   |
| Johnston 2019 (33)       | Low red meat                                        | Mortality (HR)                               | Forest plot not available for cohort studies |
| Johnston 2019 (33)       | Low red meat                                        | Cardiovascular mortality (HR)                | Forest plot not available for cohort studies |
| Johnston 2019 (33)       | Low red meat                                        | Cardiovascular disease (HR)                  | Forest plot not available for cohort studies |

HR: Hazard ratio; OR: Odds ratio; RCT: randomized controlled trial; RR: Risk ratio;

**Table S5:** Pooling results of bodies of evidence from cohort studies with RCTs based on random effects and common effect model, 95% prediction intervals, heterogeneity, test for subgroup difference, and Population (P), Intervention (I) /Exposure (E), Comparator (C) Outcome similarity degree.

| Author, year, and reference | Intervention/<br>Exposure                   | Outcome                              | BoE CSs,<br>n | Effect estimate<br>(95% CI) | I <sup>2</sup> (%)/<br>tau <sup>2</sup> | Pooled effect<br>estimate (95%)<br>RE<br>(95%<br>prediction<br>interval) | I <sup>2</sup> (%)/<br>tau <sup>2</sup> | Weight<br>CS (%) | CS<br>conclusion<br>modified | Pooled<br>effect<br>estimate<br>(95%) CE | Degree of<br>PI/ECO<br>similarity* |
|-----------------------------|---------------------------------------------|--------------------------------------|---------------|-----------------------------|-----------------------------------------|--------------------------------------------------------------------------|-----------------------------------------|------------------|------------------------------|------------------------------------------|------------------------------------|
| Aburto 2013 (2)             | Low sodium                                  | Mortality                            | 7             | RR: 0.94<br>(0.83, 1.06)    | 61/ 0.02                                | RR: 0.93<br>(0.83, 1.04)<br>(0.68, 1.26)                                 | 47/ 0.02                                | 95.0             | No                           | RR: 0.94<br>(0.88, 1.00)                 | 2                                  |
| Aburto 2013 (2)             | Low sodium                                  | Cardiovascular<br>disease            | 9             | RR: 0.90<br>(0.75, 1.08)    | 78/ 0.07                                | RR: 0.89<br>(0.75, 1.06)<br>(0.49, 1.62)                                 | 74/ 0.07                                | 91.3             | No                           | RR: 0.86<br>(0.80, 0.93)                 | 2                                  |
| Ahmad 2015 (3)              | Intra-aortic balloon<br>pump                | Mortality                            | 14            | OR: 1.02<br>(0.57, 1.82)    | 97/ 1.03                                | OR: 1.02<br>(0.67, 1.56)<br>(0.14, 7.32)                                 | 95/ 0.86                                | 62.2             | No                           | OR: 0.76<br>(0.72, 0.82)                 | 1                                  |
| Alipanah 2018 (5)           | Self-administered<br>therapy                | Treatment success                    | 16            | RR: 0.81<br>(0.74, 0.88)    | 91/ 0.02                                | RR: 0.84<br>(0.78, 0.90)<br>(0.62, 1.14)                                 | 89/ 0.02                                | 80.9             | No                           | RR: 0.92<br>(0.90, 0.94)                 | 3                                  |
| Alipanah 2018 (5)           | Self-administered<br>therapy                | Treatment<br>completion              | 14            | RR: 1.10<br>(0.91, 1.33)    | 86/ 0.07                                | RR: 1.02<br>(0.84, 1.23)<br>(0.51, 2.02)                                 | 88/0.10                                 | 75.6             | No                           | RR: 1.12<br>(1.07, 1.17)                 | 3                                  |
| Alipanah 2018 (5)           | Self-administered<br>therapy                | Mortality                            | 23            | RR: 1.35<br>(1.00, 1.83)    | 90/ 0.34                                | RR: 1.26<br>(0.95, 1.67)<br>(0.37, 4.28)                                 | 88/ 0.33                                | 90.2             | No                           | RR: 1.26<br>(1.18, 1.34)                 | 3                                  |
| Anglemyer 2013 (6)          | Antiretroviral<br>therapy                   | HIV infection                        | 9             | RR: 0.59<br>(0.36, 0.97)    | 63/ 0.25                                | RR: 0.45<br>(0.26, 0.78)<br>(0.09, 2.31)                                 | 75/ 0.42                                | 88.2             | No                           | RR: 0.72<br>(0.64, 0.82)                 | 3                                  |
| Azad 2017 (7)               | Non-nutritive<br>sweeteners                 | BMI                                  | 1             | MD: 0.77<br>(0.47, 1.07)    | NA                                      | MD: 0.23<br>(-0.77, 1.23)<br>(-3.88, 4.34)                               | 79/ 0.65                                | 38.6             | Yes                          | MD: 0.53<br>(0.26, 0.80)                 | 2                                  |
| Barnard 2015 (8)            | Surgical abortion by<br>mid-level providers | Failure or<br>incomplete<br>abortion | 2             | RR: 2.47<br>(1.44, 4.23)    | 0/ 0.00                                 | RR: 2.23<br>(1.15, 4.32)<br>(0.24, 20.54)                                | 33/ 0.15                                | 65.5             | No                           | RR: 2.14<br>(1.35, 3.39)                 | 2                                  |
| Barnard 2015 (8)            | Surgical abortion by<br>mid-level providers | Complications                        | 2             | RR: 1.30<br>(0.57, 2.96)    | 70/ 0.26                                | RR: 1.31<br>(0.70, 2.42)<br>(0.17, 10.11)                                | 32/ 0.13                                | 90.3             | No                           | RR: 1.51<br>(1.05, 2.17)                 | 2                                  |

|                            |                                                                          |                                    |    |                          |          |                                          |          |      |     |                          |   |
|----------------------------|--------------------------------------------------------------------------|------------------------------------|----|--------------------------|----------|------------------------------------------|----------|------|-----|--------------------------|---|
| Barnard 2015 (8)           | Surgical abortion by mid-level providers                                 | Abortion failure and complications | 3  | RR: 1.33<br>(0.78, 2.27) | 74/ 0.16 | RR: 1.36<br>(0.83, 2.21)<br>(0.29, 6.32) | 65/ 0.17 | 80.5 | No  | RR: 1.43<br>(1.12, 1.82) | 2 |
| Bellemain-Appaix 2012 (9)  | Clopidogrel pretreatment for percutaneous coronary intervention          | Mortality                          | 8  | OR: 0.79<br>(0.53, 1.18) | 79/ 0.23 | OR: 0.77<br>(0.57, 1.04)<br>(0.30, 2.02) | 66/ 0.17 | 69.3 | No  | OR: 0.65<br>(0.57, 0.75) | 2 |
| Bellemain-Appaix 2012 (9)  | Clopidogrel pretreatment for percutaneous coronary intervention          | Major bleeding                     | 8  | OR: 1.03<br>(0.69, 1.53) | 64/ 0.16 | OR: 1.04<br>(0.81, 1.33)<br>(0.54, 2.03) | 46/ 0.08 | 59.6 | No  | OR: 1.07<br>(0.92, 1.24) | 2 |
| Bellemain-Appaix 2012 (9)  | Clopidogrel pretreatment for percutaneous coronary intervention          | Major coronary event               | 8  | OR: 0.76<br>(0.60, 0.95) | 82/ 0.08 | OR: 0.76<br>(0.65, 0.89)<br>(0.45, 1.29) | 69/ 0.05 | 64.0 | No  | OR: 0.78<br>(0.73, 0.85) | 2 |
| Bellemain-Appaix 2014 (10) | P2Y12 inhibitor pretreatment in non-ST elevation acute coronary syndrome | Mortality                          | 4  | OR: 0.69<br>(0.35, 1.32) | 35/ 0.17 | OR: 0.90<br>(0.75, 1.07)<br>(0.65, 1.24) | 10/ 0.01 | 33.2 | No  | OR: 0.91<br>(0.80, 1.04) | 2 |
| Bellemain-Appaix 2014 (10) | P2Y12 inhibitor pretreatment in non-ST elevation acute coronary syndrome | Major bleeding                     | 4  | OR: 1.13<br>(0.92, 1.39) | 0/ 0.00  | OR: 1.27<br>(1.10, 1.47)<br>(1.05, 1.54) | 0/ 0.00  | 50.3 | No  | OR: 1.27<br>(1.10, 1.47) | 2 |
| Bellemain-Appaix 2014 (10) | P2Y12 inhibitor pretreatment in non-ST elevation acute coronary syndrome | Main composite ischemic endpoint   | 4  | OR: 0.78<br>(0.56, 1.08) | 65/ 0.07 | OR: 0.84<br>(0.72, 0.98)<br>(0.56, 1.26) | 52/ 0.02 | 45.0 | Yes | OR: 0.85<br>(0.78, 0.93) | 2 |
| Bloomfield 2016 (11)       | Mediterranean diet                                                       | Breast cancer                      | 13 | RR: 0.96<br>(0.90, 1.03) | 52/ 0.01 | RR: 0.95<br>(0.89, 1.02)<br>(0.78, 1.17) | 57/ 0.01 | 99.1 | No  | RR: 0.98<br>(0.95, 1.02) | 2 |
| Bolland 2015 (12)          | High calcium                                                             | All fractures                      | 5  | RR: 1.02<br>(0.93, 1.12) | 68/ 0.01 | RR: 0.94<br>(0.88, 1.00)<br>(0.78, 1.14) | 50/ 0.01 | 42.0 | No  | RR: 0.99<br>(0.96, 1.02) | 2 |
| Bolland 2015 (12)          | High calcium                                                             | Vertebral fracture                 | 1  | RR: 1.40<br>(1.10, 1.78) | NA       | RR: 0.94<br>(0.79, 1.11)<br>(0.65, 1.34) | 22/ 0.02 | 23.3 | Yes | RR: 0.98<br>(0.87, 1.11) | 2 |
| Bolland 2015 (12)          | High calcium                                                             | Hip fracture                       | 6  | RR: 1.09<br>(0.91, 1.30) | 50/ 0.03 | RR: 1.02<br>(0.89, 1.18)<br>(0.67, 1.56) | 46/ 0.04 | 57.2 | No  | RR: 0.98<br>(0.91, 1.07) | 2 |



|                      |                                           |                                                      |    |                             |          |                                              |          |      |     |                             |   |
|----------------------|-------------------------------------------|------------------------------------------------------|----|-----------------------------|----------|----------------------------------------------|----------|------|-----|-----------------------------|---|
| Brenner 2014 (13)    | Sigmoidoscopy, screening for CRC          | Colorectal cancer mortality                          | 1  | RR: 0.59<br>(0.45, 0.77)    | NA       | RR: 0.70<br>(0.64, 0.77)<br>(0.60, 0.82)     | 0/ 0.00  | 12.7 | No  | RR: 0.70<br>(0.64, 0.77)    | 1 |
| Brenner 2014 (13)    | Sigmoidoscopy, screening for CRC          | Colorectal cancer incidence                          | 2  | RR: 0.50<br>(0.37, 0.69)    | 0/ 0.00  | RR: 0.78<br>(0.69, 0.89)<br>(0.55, 1.11)     | 65/ 0.01 | 11.0 | No  | RR: 0.79<br>(0.74, 0.84)    | 2 |
| Chowdhury 2012 (14)  | High omega-3-fatty acids                  | Cerebrovascular disease                              | 10 | RR: 0.89<br>(0.80, 0.99)    | 17/ 0.01 | RR: 0.93<br>(0.85, 1.01)<br>(0.78, 1.10)     | 21/ 0.00 | 59.3 | Yes | RR: 0.95<br>(0.89, 1.01)    | 2 |
| Chowdhury 2014a (15) | High $\alpha$ -linolenic acid             | Coronary event                                       | 7  | RR: 0.99<br>(0.88, 1.11)    | 61/ 0.02 | RR: 0.99<br>(0.88, 1.11)<br>(0.72, 1.37)     | 54/ 0.02 | 78.6 | No  | RR: 1.01<br>(0.95, 1.08)    | 3 |
| Chowdhury 2014a (15) | High omega-3-fatty acids                  | Coronary event                                       | 16 | RR: 0.87<br>(0.78, 0.97)    | 76/ 0.03 | RR: 0.90<br>(0.83, 0.97)<br>(0.66, 1.22)     | 61/ 0.02 | 61.9 | No  | RR: 0.93<br>(0.89, 0.97)    | 3 |
| Chowdhury 2014a (15) | High omega-6-fatty acids                  | Coronary event                                       | 8  | RR: 0.98<br>(0.90, 1.06)    | 54/ 0.01 | RR: 0.94<br>(0.87, 1.03)<br>(0.73, 1.21)     | 56/0.01  | 70.0 | No  | RR: 0.96<br>(0.94, 1.01)    | 3 |
| Chung 2016 (18)      | High calcium                              | Cardiovascular disease mortality                     | 6  | RR: 0.97<br>(0.86, 1.09)    | 37/ 0.01 | RR: 0.99<br>(0.92, 1.07)<br>(0.86, 1.15)     | 11/ 0.00 | 89.9 | No  | RR: 1.01<br>(0.95, 1.07)    | 2 |
| Ding 2017 (19)       | High dairy                                | Systolic blood pressure                              | 27 | MD: -0.11<br>(-0.20, -0.02) | 30/ 0.01 | MD: -0.11<br>(-0.20, -0.03)<br>(-0.34, 0.11) | 24/ 0.01 | 98.8 | No  | MD: -0.16<br>(-0.21, -0.11) | 2 |
| Fenton 2018 (20)     | Radiation therapy                         | Erectile dysfunction                                 | 7  | RR: 1.30<br>(1.19, 1.43)    | 31/ 0.00 | RR: 1.24<br>(1.09, 1.41)<br>(0.83, 1.86)     | 70/ 0.02 | 85.7 | No  | RR: 1.23<br>(1.15, 1.32)    | 2 |
| Fenton 2018 (20)     | Radical Prostatectomy                     | Urinary incontinence                                 | 5  | RR: 2.91<br>(1.80, 4.71)    | 67/ 0.18 | RR: 2.54<br>(1.97, 3.27)<br>(1.28, 5.03)     | 51/ 0.06 | 52.1 | No  | RR: 2.46<br>(2.08, 2.90)    | 2 |
| Fenton 2018 (20)     | Radical Prostatectomy                     | Erectile dysfunction                                 | 6  | RR: 1.49<br>(1.33, 1.66)    | 63/ 0.01 | RR: 1.53<br>(1.37, 1.70)<br>(1.07, 2.18)     | 75/ 0.02 | 65.1 | No  | RR: 1.50<br>(1.42, 1.58)    | 2 |
| Filippini 2017 (21)  | Disease-modifying drugs                   | Conversion to clinically definite multiple sclerosis | 2  | HR: 0.48<br>(0.30, 0.78)    | 62/ 0.08 | HR: 0.53<br>(0.47, 0.59)<br>(0.46, 0.61)     | 0/ 0.00  | 70.0 | No  | HR: 0.53<br>(0.47, 0.59)    | 2 |
| Fluri 2010 (22)      | Extracranial-intracranial arterial bypass | Mortality                                            | 11 | OR: 0.97<br>(0.58, 1.62)    | 0/ 0.00  | OR: 0.84<br>(0.66, 1.06)<br>(0.64, 1.09)     | 0/ 0.00  | 20.3 | No  | OR: 0.84<br>(0.66, 1.06)    | 2 |

|                     |                                           |                                   |    |                          |          |                                          |          |      |     |                          |   |
|---------------------|-------------------------------------------|-----------------------------------|----|--------------------------|----------|------------------------------------------|----------|------|-----|--------------------------|---|
| Fluri 2010 (22)     | Extracranial-intracranial arterial bypass | Any stroke                        | 15 | OR: 0.76<br>(0.49, 1.17) | 2/ 0.02  | OR: 0.77<br>(0.50, 1.17)<br>(0.29, 2.05) | 29/ 0.17 | 67.5 | No  | OR: 0.95<br>(0.78, 1.16) | 2 |
| Fluri 2010 (22)     | Extracranial-intracranial arterial bypass | Death or dependency               | 8  | OR: 0.81<br>(0.50, 1.31) | 0/ 0.00  | OR: 0.91<br>(0.73, 1.14)<br>(0.70, 1.19) | 0/ 0.00  | 20.6 | No  | OR: 0.91<br>(0.73, 1.14) | 2 |
| Gargiulo 2016 (23)  | Transcatheter aortic valve implantation   | Early mortality                   | 29 | OR: 1.08<br>(0.84, 1.39) | 41/ 0.16 | OR: 1.01<br>(0.81, 1.26)<br>(0.47, 2.20) | 39/ 0.13 | 81.6 | No  | OR: 1.02<br>(0.88, 1.19) | 2 |
| Gargiulo 2016 (23)  | Transcatheter aortic valve implantation   | Mid-term mortality                | 18 | OR: 1.00<br>(0.81, 1.24) | 46/ 0.08 | OR: 0.96<br>(0.82, 1.13)<br>(0.59, 1.58) | 40/ 0.05 | 71.0 | No  | OR: 0.93<br>(0.83, 1.04) | 2 |
| Gargiulo 2016 (23)  | Transcatheter aortic valve implantation   | Long-term mortality               | 6  | OR: 1.70<br>(1.31, 2.20) | 0/ 0.00  | OR: 1.28<br>(1.00, 1.65)<br>(0.62, 2.66) | 62/ 0.08 | 46.7 | Yes | OR: 1.18<br>(1.03, 1.35) | 2 |
| Hartling 2013 (24)  | Treating Gestational Diabetes Mellitus    | Birth weight > 4000g              | 6  | RR: 0.69<br>(0.31, 1.54) | 88/ 0.64 | RR: 0.58<br>(0.40, 0.86)<br>(0.17, 2.01) | 79/ 0.25 | 48.3 | Yes | RR: 0.54<br>(0.46, 0.63) | 2 |
| Hartling 2013 (24)  | Treating Gestational Diabetes Mellitus    | Large-for-gestational age neonate | 4  | RR: 0.43<br>(0.27, 0.70) | 58/ 0.13 | RR: 0.47<br>(0.36, 0.62)<br>(0.22, 1.02) | 60/ 0.07 | 49.8 | No  | RR: 0.45<br>(0.39, 0.52) | 2 |
| Hartling 2013 (24)  | Treating Gestational Diabetes Mellitus    | Shoulder dystocia                 | 4  | RR: 0.38<br>(0.19, 0.75) | 16/ 0.09 | RR: 0.39<br>(0.26, 0.60)<br>(0.23, 0.68) | 0/ 0.00  | 50.1 | No  | RR: 0.39<br>(0.26, 0.60) | 2 |
| Henderson 2019 (25) | Treating asymptomatic bacteriuria         | Pyelonephritis                    | 2  | RR: 0.29<br>(0.15, 0.57) | 0/ 0.00  | RR: 0.25<br>(0.16, 0.39)<br>(0.07, 0.87) | 48/ 0.28 | 15.1 | No  | RR: 0.30<br>(0.23, 0.40) | 3 |
| Higgins 2016 (26)   | BCG                                       | Mortality                         | 8  | RR: 0.46<br>(0.30, 0.69) | 63/ 0.19 | RR: 0.51<br>(0.36, 0.72)<br>(0.18, 1.46) | 67/ 0.19 | 70.1 | No  | RR: 0.57<br>(0.48, 0.68) | 3 |
| Higgins 2016 (26)   | Measles containing vaccines               | Mortality                         | 13 | RR: 0.53<br>(0.40, 0.70) | 67/ 0.14 | RR: 0.57<br>(0.45, 0.72)<br>(0.27, 1.21) | 58/ 0.11 | 80.4 | No  | RR: 0.65<br>(0.57, 0.74) | 3 |
| Hopley 2010 (27)    | Total hip arthroplasty                    | Reoperation                       | 6  | RR: 0.45<br>(0.19, 1.08) | 23/ 0.28 | RR: 0.66<br>(0.33, 1.32)<br>(0.13, 3.42) | 34/ 0.39 | 56.1 | No  | RR: 0.72<br>(0.43, 1.20) | 2 |
| Hopley 2010 (27)    | Total hip arthroplasty                    | Dislocation                       | 5  | RR: 0.79<br>(0.27, 2.35) | 18/ 0.28 | RR: 1.20<br>(0.52, 2.76)<br>(0.28, 5.08) | 12/ 0.17 | 63.7 | No  | RR: 1.16<br>(0.54, 2.52) | 2 |

|                     |                                                                  |                           |    |                          |          |                                           |          |      |     |                          |   |
|---------------------|------------------------------------------------------------------|---------------------------|----|--------------------------|----------|-------------------------------------------|----------|------|-----|--------------------------|---|
| Hopley 2010 (27)    | Total hip arthroplasty                                           | Deep infection            | 4  | RR: 0.91<br>(0.25, 3.28) | 0/ 0.00  | RR: 1.37<br>(0.64, 2.94)<br>(0.50, 3.73)  | 0/ 0.00  | 35.9 | No  | RR: 1.37<br>(0.64, 2.94) | 2 |
| Hüpfl 2010 (28)     | Chest-compression-<br>only cardio-<br>pulmonary<br>resuscitation | Survival                  | 7  | RR: 0.96<br>(0.83, 1.11) | 0/ 0.00  | RR: 1.04<br>(0.92, 1.19)<br>(0.83, 1.31)  | 13/ 0.01 | 61.9 | No  | RR: 1.05<br>(0.93, 1.18) | 3 |
| Jamal 2013 (29)     | Non-calcium-based<br>phosphate binders                           | Mortality                 | 3  | RR: 0.89<br>(0.78, 1.00) | 0/ 0.00  | RR: 0.87<br>(0.77, 0.97)<br>(0.67, 1.12)  | 28/ 0.01 | 49.1 | Yes | RR: 0.89<br>(0.82, 0.96) | 2 |
| Jefferson 2010 (30) | Parenteral influenza<br>vaccine                                  | Influenza-like<br>illness | 30 | RR: 0.76<br>(0.66, 0.87) | 57/ 0.07 | RR: 0.73<br>(0.64, 0.82)<br>(0.43, 1.22)  | 54/ 0.06 | 85.6 | No  | RR: 0.70<br>(0.65, 0.75) | 3 |
| Jefferson 2010 (30) | Parenteral influenza<br>vaccine                                  | Influenza                 | 10 | RR: 0.51<br>(0.27, 0.97) | 64/ 0.52 | RR: 0.51<br>(0.32, 0.80)<br>(0.13, 2.02)  | 59/ 0.34 | 68.7 | No  | RR: 0.60<br>(0.47, 0.78) | 2 |
| Jefferson 2012 (31) | Inactivated influenza<br>vaccines                                | Influenza                 | 1  | RR: 0.20<br>(0.10, 0.39) | NA       | RR: 0.37<br>(0.26, 0.53)<br>(0.15, 0.92)  | 44/ 0.11 | 15.2 | No  | RR: 0.34<br>(0.27, 0.43) | 2 |
| Jefferson 2012 (31) | Inactivated influenza<br>vaccines                                | Influenza-like<br>illness | 2  | RR: 0.29<br>(0.07, 1.15) | 95/ 1.43 | RR: 0.56<br>(0.46, 0.68)<br>(0.33, 0.94)  | 87/ 0.04 | 34.8 | Yes | RR: 0.74<br>(0.71, 0.77) | 2 |
| Jin 2012 (32)       | High total flavonoids                                            | Colorectal<br>neoplasms   | 3  | RR: 1.00<br>(0.80, 1.25) | 66/ 0.02 | RR: 1.03<br>(0.88, 1.20)<br>(0.56, 1.88)  | 56/ 0.01 | 69.6 | No  | RR: 1.02<br>(0.93, 1.13) | 3 |
| Kansagara 2013 (34) | Transfusion                                                      | Mortality                 | 11 | RR: 2.49<br>(1.40, 4.43) | 97/ 0.94 | RR: 1.84<br>(1.10, 3.07)<br>(0.20, 16.54) | 96/ 1.00 | 74.4 | No  | RR: 3.32<br>(3.03, 3.65) | 3 |
| Keag 2018 (35)      | Caesarean section                                                | Urinary<br>incontinence   | 8  | OR: 0.56<br>(0.48, 0.66) | 70/ 0.04 | OR: 0.58<br>(0.50, 0.68)<br>(0.36, 0.94)  | 68/ 0.04 | 90.0 | No  | OR: 0.62<br>(0.57, 0.67) | 3 |
| Keag 2018 (35)      | Caesarean section                                                | Fecal incontinence        | 5  | OR: 1.04<br>(0.73, 1.48) | 72/ 0.10 | OR: 1.11<br>(0.78, 1.58)<br>(0.38, 3.26)  | 71/ 0.12 | 93.6 | No  | OR: 1.11<br>(0.94, 1.31) | 3 |
| Kredo 2014 (36)     | Antiretroviral<br>therapy by nurses                              | Mortality                 | 2  | RR: 1.23<br>(1.14, 1.33) | 0/ 0.00  | RR: 1.13<br>(0.94, 1.36)<br>(0.13, 9.93)  | 76/ 0.02 | 64.7 | Yes | RR: 1.17<br>(1.10, 1.26) | 3 |

|                      |                                                  |                                                         |   |                          |          |                                             |          |      |     |                          |   |
|----------------------|--------------------------------------------------|---------------------------------------------------------|---|--------------------------|----------|---------------------------------------------|----------|------|-----|--------------------------|---|
| Kredo 2014 (36)      | Antiretroviral therapy by nurses                 | Attrition                                               | 2 | RR: 0.30<br>(0.05, 1.94) | 98/ 1.77 | RR: 0.43<br>(0.21, 0.86)<br>(0.00, 2691.24) | 95/ 0.35 | 65.6 | Yes | RR: 0.75<br>(0.71, 0.79) | 3 |
| Kredo 2014 (36)      | Nurses for maintenance of antiretroviral therapy | Mortality                                               | 1 | RR: 0.19<br>(0.05, 0.78) | NA       | RR: 0.61<br>(0.28, 1.35)<br>(0.00, 2756.46) | 56/ 0.28 | 20.2 | Yes | RR: 0.79<br>(0.54, 1.16) | 3 |
| Li 2014 (37)         | Exenatide                                        | Acute pancreatitis/<br>Admission for acute pancreatitis | 2 | RR: 0.92<br>(0.69, 1.22) | 0/ 0.00  | RR: 0.92<br>(0.69, 1.22)<br>(0.64, 1.32)    | 0/ 0.00  | 96.0 | No  | RR: 0.92<br>(0.69, 1.21) | 2 |
| Li 2016 (38)         | DDP-4 Inhibitors                                 | Heart failure                                           | 4 | RR: 1.10<br>(1.04, 1.17) | 0/ 0.00  | RR: 1.10<br>(1.04, 1.17)<br>(1.03, 1.16)    | 0/ 0.00  | 98.4 | No  | RR: 1.10<br>(1.04, 1.17) | 2 |
| Li 2016 (38)         | DDP-4 Inhibitors                                 | Hospital admission for heart failure                    | 6 | OR: 0.85<br>(0.74, 0.97) | 33/ 0.01 | OR: 0.94<br>(0.83, 1.08)<br>(0.66, 1.36)    | 55/ 0.02 | 58.1 | Yes | OR: 0.97<br>(0.90, 1.05) | 2 |
| Matthews 2018 (39)   | Tamoxifen                                        | Heart failure                                           | 2 | RR: 0.85<br>(0.66, 1.09) | 10/ 0.00 | RR: 0.74<br>(0.53, 1.04)<br>(0.02, 29.27)   | 59/ 0.05 | 70.5 | No  | RR: 0.75<br>(0.61, 0.92) | 3 |
| Menne 2019 (40)      | SGLT-2 inhibitors                                | Acute kidney injury                                     | 5 | OR: 0.40<br>(0.31, 0.52) | 39/ 0.03 | OR: 0.58<br>(0.49, 0.69)<br>(0.41, 0.99)    | 27/ 0.05 | 36.9 | No  | OR: 0.62<br>(0.56, 0.68) | 2 |
| Mesgarpour 2017 (41) | Erythropoiesis stimulating agents                | Venous thromboembolism                                  | 5 | RR: 1.92<br>(0.64, 5.76) | 75/ 1.03 | RR: 1.26<br>(0.76, 2.10)<br>(0.20, 8.14)    | 84/ 0.70 | 28.4 | No  | RR: 1.71<br>(1.45, 2.01) | 2 |
| Mesgarpour 2017 (41) | Erythropoiesis stimulating agents                | Mortality                                               | 7 | RR: 1.08<br>(0.66, 1.78) | 91/ 0.35 | RR: 0.88<br>(0.64, 1.21)<br>(0.21, 3.71)    | 92/ 0.46 | 33.5 | No  | RR: 2.20<br>(2.15, 2.25) | 2 |
| Moberley 2013 (42)   | Pneumococcal polysaccharide vaccines             | Invasive pneumococcal disease                           | 2 | OR: 0.57<br>(0.36, 0.89) | 0/ 0.00  | OR: 0.40<br>(0.26, 0.61)<br>(0.18, 0.85)    | 12/ 0.07 | 51.9 | No  | OR: 0.42<br>(0.29, 0.59) | 2 |
| Molnar 2015 (43)     | Neoral (cyclosporine)                            | Acute rejection of kidney transplant                    | 2 | OR: 0.46<br>(0.25, 0.86) | 5/ 0.02  | OR: 0.74<br>(0.36, 1.54)<br>(0.04, 12.62)   | 56/ 0.29 | 50.4 | Yes | OR: 0.71<br>(0.46, 1.10) | 2 |
| Navarese 2013 (44)   | Early intervention for NSTEMI-ACS                | Mortality                                               | 4 | OR: 0.80<br>(0.63, 1.02) | 78/ 0.04 | OR: 0.82<br>(0.69, 0.97)<br>(0.54, 1.24)    | 45/ 0.03 | 74.8 | Yes | OR: 0.86<br>(0.80, 0.94) | 2 |
| Navarese 2013 (44)   | Early intervention for NSTEMI-ACS                | Myocardial infarction                                   | 3 | OR: 0.86<br>(0.69, 1.08) | 86/ 0.03 | OR: 0.97<br>(0.77, 1.22)<br>(0.48, 1.94)    | 81/ 0.08 | 49.4 | No  | OR: 0.90<br>(0.83, 0.97) | 2 |

|                         |                                                        |                                   |    |                            |           |                                             |          |      |     |                            |   |
|-------------------------|--------------------------------------------------------|-----------------------------------|----|----------------------------|-----------|---------------------------------------------|----------|------|-----|----------------------------|---|
| Navarese 2013 (44)      | Early intervention for NSTEMI-ACS                      | Major bleeding                    | 3  | OR: 1.12<br>(0.69, 1.82)   | 92/ 0.17  | OR: 0.92<br>(0.68, 1.24)<br>(0.39, 2.15)    | 70/ 0.11 | 56.3 | No  | OR: 1.00<br>(0.88, 1.13)   | 2 |
| Nelson 2010 (45)        | Caesarean section                                      | Anal incontinence, feces          | 12 | OR: 0.91<br>(0.72, 1.16)   | 0/ 0.00   | OR: 0.92<br>(0.74, 1.16)<br>(0.72, 1.19)    | 0/ 0.00  | 90.0 | No  | OR: 0.92<br>(0.74, 1.16)   | 3 |
| Nelson 2010 (45)        | Caesarean section                                      | Anal incontinence, flatus         | 4  | OR: 1.02<br>(0.87, 1.20)   | 0/ 0.00   | OR: 1.00<br>(0.86, 1.16)<br>(0.78, 1.28)    | 0/ 0.00  | 90.3 | No  | OR: 1.00<br>(0.86, 1.16)   | 3 |
| Nieuwenhuijse 2014 (46) | Ceramic-on-ceramic bearings for total hip arthroplasty | Harris Hip Score                  | 3  | MD: -0.50<br>(-2.09, 1.09) | 62/ 1.08  | MD: -0.29<br>(-0.96, 0.38)<br>(-1.81, 1.22) | 32/ 0.31 | 40.7 | No  | MD: -0.20<br>(-0.66, 0.26) | 2 |
| Nieuwenhuijse 2014 (46) | High-flexion total knee arthroplasty                   | Flexion (degrees)                 | 26 | MD: 3.78<br>(1.64, 5.92)   | 78/ 19.12 | MD: 2.91<br>(1.56, 4.27)<br>(-4.42, 10.25)  | 73/ 12.7 | 53.2 | No  | MD: 2.49<br>(1.84, 3.14)   | 2 |
| Nieuwenhuijse 2014 (46) | Gender-specific total knee arthroplasty                | Flexion-extension range (degrees) | 2  | MD: 3.15<br>(-0.03, 6.34)  | 29/ 1.58  | MD: 1.80<br>(0.40, 3.21)<br>(-0.53, 4.14)   | 9/ 0.40  | 25.6 | Yes | MD: 1.85<br>(0.54, 3.16)   | 2 |
| Nikooie 2019 (47)       | Second generation antipsychotics                       | Sedation                          | 3  | RR: 1.84<br>(0.40, 8.54)   | 34/ 0.84  | RR: 1.29<br>(0.95, 1.74)<br>(0.91, 1.83)    | 0/ 0.00  | 6.0  | No  | RR: 1.29<br>(0.95, 1.74)   | 2 |
| Nikooie 2019 (47)       | Second generation antipsychotics                       | Neurologic outcomes               | 5  | RR: 0.76<br>(0.59, 0.99)   | 0/ 0.00   | RR: 0.73<br>(0.57, 0.93)<br>(0.56, 0.95)    | 0/ 0.00  | 91.0 | No  | RR: 0.73<br>(0.57, 0.93)   | 2 |
| Ochen 2019 (48)         | Surgery for achilles tendon rupture                    | Re-rupture                        | 18 | RR: 0.42<br>(0.28, 0.65)   | 30/ 0.19  | RR: 0.43<br>(0.31, 0.60)<br>(0.20, 0.96)    | 21/ 0.12 | 69.6 | No  | RR: 0.65<br>(0.54, 0.79)   | 2 |
| Ochen 2019 (48)         | Surgery for achilles tendon rupture                    | Complications                     | 15 | RR: 2.93<br>(2.28, 3.75)   | 0/ 0.00   | RR: 2.72<br>(1.84, 4.02)<br>(0.84, 8.82)    | 41/ 0.28 | 57.8 | No  | RR: 2.63<br>(2.13, 3.27)   | 2 |
| Pittas 2010 (49)        | High vitamin D                                         | Hypertension                      | 3  | RR: 0.57<br>(0.41, 0.79)   | 0/ 0.00   | RR: 0.68<br>(0.43, 1.07)<br>(0.10, 4.51)    | 77/ 0.14 | 61.8 | Yes | RR: 1.00<br>(0.95, 1.05)   | 3 |
| Raman 2013 (50)         | Carotid endarterectomy                                 | Ipsilateral stroke                | 2  | RR: 0.47<br>(0.05, 4.46)   | 83/ 2.19  | RR: 0.70<br>(0.51, 0.97)<br>(0.29, 1.69)    | 38/ 0.05 | 11.9 | Yes | RR: 0.72<br>(0.58, 0.89)   | 2 |
| Raman 2013 (50)         | Carotid endarterectomy                                 | Any stroke                        | 3  | RR: 0.73<br>(0.43, 1.22)   | 0/ 0.00   | RR: 0.67<br>(0.57, 0.79)<br>(0.53, 0.84)    | 0/ 0.00  | 9.7  | Yes | RR: 0.67<br>(0.57, 0.79)   | 2 |

|                           |                          |                                        |   |                            |          |                                             |          |      |     |                             |   |
|---------------------------|--------------------------|----------------------------------------|---|----------------------------|----------|---------------------------------------------|----------|------|-----|-----------------------------|---|
| Raman 2013 (50)           | Carotid artery stenting  | Periprocedural stroke                  | 5 | RR: 1.91<br>(1.72, 2.11)   | 7/ 0.00  | RR: 1.91<br>(1.74, 2.10)<br>(1.69, 2.16)    | 0/ 0.00  | 98.2 | No  | RR: 1.91<br>(1.74, 2.10)    | 2 |
| Schweizer 2013 (51)       | Nasal deconolization     | Surgical site infection                | 6 | RR: 0.40<br>(0.28, 0.57)   | 0/ 0.00  | RR: 0.48<br>(0.33, 0.69)<br>(0.18, 1.26)    | 44/ 0.15 | 52.4 | No  | RR: 0.54<br>(0.42, 0.69)    | 2 |
| Schweizer 2013 (51)       | Glycopeptide prophylaxis | Surgical site infection                | 7 | RR: 0.35<br>(0.12, 1.03)   | 80/ 1.44 | RR: 0.71<br>(0.48, 1.05)<br>(0.22, 2.27)    | 62/ 0.25 | 38.5 | No  | RR: 1.04<br>(0.66, 1.24)    | 2 |
| Silvain 2012 (52)         | Enoxaparin               | Mortality                              | 7 | RR: 0.50<br>(0.40, 0.62)   | 0/ 0.00  | RR: 0.64<br>(0.49, 0.82)<br>(0.32, 1.26)    | 46/ 0.08 | 48.9 | No  | RR: 0.66<br>(0.56, 0.77)    | 2 |
| Silvain 2012 (52)         | Enoxaparin               | Major bleeding                         | 7 | RR: 0.72<br>(0.56, 0.93)   | 0/ 0.00  | RR: 0.81<br>(0.66, 1.00)<br>(0.49, 1.37)    | 30/ 0.05 | 42.5 | Yes | RR: 0.84<br>(0.72, 0.98)    | 2 |
| Silvain 2012 (52)         | Enoxaparin               | Death or Myocardial infarction         | 7 | RR: 0.44<br>(0.35, 0.55)   | 0/ 0.00  | RR: 0.67<br>(0.55, 0.81)<br>(0.37, 1.21)    | 58/ 0.07 | 34.3 | No  | RR: 0.77<br>(0.71, 0.85)    | 2 |
| Suthar 2012 (53)          | Antiretroviral therapy   | Tuberculosis infection                 | 9 | HR: 0.32<br>(0.25, 0.41)   | 27/ 0.03 | HR: 0.35<br>(0.29, 0.44)<br>(0.22, 0.57)    | 26/ 0.03 | 78.9 | No  | HR: 0.37<br>(0.31, 0.44)    | 3 |
| Te Morenga 2013 (54)      | High sugar intake        | Weight gain (kg)                       | 4 | MD: 0.31<br>(-0.07, 0.68)  | 99/ 0.14 | MD: 0.51<br>(0.26, 0.75)<br>(-0.36, 1.37)   | 99/ 0.14 | 42.0 | Yes | MD: 0.59<br>(0.58, 0.60)    | 2 |
| Te Morenga 2013 (54)      | High sugar intake        | BMI (kg/m <sup>2</sup> )               | 4 | MD: -0.02<br>(-0.05, 0.00) | 74/ 0.00 | MD: -0.02<br>(-0.05,-0.00)<br>(-0.05, 0.09) | 58/ 0.00 | 5.0  | No  | MD: -0.01<br>(-0.03, -0.00) | 2 |
| Thomas 2010 (55)          | Influenza vaccines       | Influenza-like illness                 | 1 | RR: 0.31<br>(0.26, 0.36)   | NA       | RR: 0.53<br>(0.31, 0.89)<br>(0.08, 3.48)    | 94/ 0.28 | 24.5 | No  | RR: 0.48<br>(0.43, 0.53)    | 3 |
| Tickell-Painter 2017 (56) | Mefloquine               | Discontinuation due to adverse effects | 9 | RR: 2.73<br>(1.84, 4.06)   | 31/ 0.11 | RR: 2.78<br>(2.05, 3.77)<br>(1.57, 4.91)    | 15/ 0.04 | 79.2 | No  | RR: 2.85<br>(2.19, 3.71)    | 2 |
| Tickell-Painter 2017 (56) | Mefloquine               | Serious adverse events or effects      | 2 | RR: 3.09<br>(0.38, 24.95)  | 0/ 0.00  | RR: 1.31<br>(0.33, 5.23)<br>(0.14, 12.39)   | 0/ 0.00  | 43.7 | No  | RR: 1.31<br>(0.33, 5.23)    | 3 |
| Tickell-Painter 2017 (56) | Mefloquine               | Nausea                                 | 3 | RR: 1.86<br>(1.42, 2.42)   | 0/ 0.00  | RR: 1.56<br>(1.30, 1.87)<br>(1.16, 2.09)    | 0/ 0.00  | 46.3 | No  | RR: 1.56<br>(1.30, 1.87)    | 3 |

|                   |                                                                                       |                              |    |                               |               |                                                  |            |      |     |                               |   |
|-------------------|---------------------------------------------------------------------------------------|------------------------------|----|-------------------------------|---------------|--------------------------------------------------|------------|------|-----|-------------------------------|---|
| Tricco 2018 (57)  | Live-attenuated zoster vaccines                                                       | Suspected Herpes Zoster      | 3  | RR: 0.48<br>(0.27, 0.83)      | 99/ 0.24      | RR: 0.55<br>(0.40, 0.77)<br>(0.20, 1.52)         | 97/ 0.14   | 56.6 | No  | RR: 0.72<br>(0.70, 0.74)      | 2 |
| Vinceti 2018 (58) | Selenium                                                                              | Any cancer                   | 7  | RR: 0.72<br>(0.55, 0.93)      | 46/ 0.06      | RR: 0.86<br>(0.73, 1.01)<br>(0.52, 1.42)         | 64/ 0.04   | 45.7 | Yes | RR: 0.94<br>(0.88, 1.01)      | 3 |
| Vinceti 2018 (58) | Selenium                                                                              | Cancer mortality             | 7  | RR: 0.76<br>(0.59, 0.97)      | 66/ 0.07      | RR: 0.78<br>(0.64, 0.95)<br>(0.44, 1.39)         | 65/ 0.05   | 73.2 | No  | RR: 0.88<br>(0.80, 0.96)      | 3 |
| Vinceti 2018 (58) | Selenium                                                                              | Colorectal cancer            | 6  | RR: 0.82<br>(0.72, 0.94)      | 0/ 0.00       | RR: 0.83<br>(0.74, 0.94)<br>(0.73, 0.95)         | 0/ 0.00    | 85.6 | No  | RR: 0.83<br>(0.74, 0.94)      | 3 |
| Wilson 2011 (59)  | Training for traditional birth attendants/ assistance by traditional birth attendants | Perinatal mortality          | 1  | RR: 0.82<br>(0.38, 1.78)      | NA            | RR: 0.77<br>(0.67, 0.89)<br>(0.53, 1.13)         | 52/ 0.01   | 3.0  | Yes | RR: 0.79<br>(0.73, 0.86)      | 3 |
| Wilson 2011 (59)  | Training for traditional birth attendants/ assistance by traditional birth attendants | Neonatal mortality           | 2  | RR: 0.80<br>(0.47, 1.37)      | 0/ 0.00       | RR: 0.80<br>(0.73, 0.88)<br>(0.67, 0.95)         | 14.0/ 0.00 | 3.0  | Yes | RR: 0.80<br>(0.74, 0.87)      | 3 |
| Wilson 2019 (60)  | Unilateral knee arthroplasty                                                          | Venous thromboembolism       | 8  | RR: 0.42<br>(0.30, 0.57)      | 24/ 0.04      | RR: 0.43<br>(0.33, 0.55)<br>(0.29, 0.64)         | 8/ 0.01    | 98.1 | No  | RR: 0.45<br>(0.37, 0.54)      | 2 |
| Wilson 2019 (60)  | Unilateral knee arthroplasty                                                          | Range of movement (degrees)  | 11 | MD: -8.43<br>(-10.15, -6.71)  | 86/ 6.20      | MD: -7.60<br>(-9.27, -5.93)<br>(-13.98, -1.22)   | 91/ 7.85   | 77.8 | No  | MD: -8.29<br>(-8.63, -7.95)   | 2 |
| Wilson 2019 (60)  | Unilateral knee arthroplasty                                                          | Operation duration (minutes) | 8  | MD: -23.80<br>(-40.43, -7.17) | 99/<br>491.19 | MD: -17.07<br>(-29.11, -5.04)<br>(-63.37, 29.23) | 98/ 365.45 | 69.8 | No  | MD: -11.25<br>(-12.71, -9.97) | 2 |
| Yank 2011 (61)    | Recombinant factor VII                                                                | Mortality                    | 2  | RR: 0.91<br>(0.39, 2.12)      | 0/ 0.00       | RR: 1.08<br>(0.56, 2.09)<br>(0.25, 4.59)         | 0/ 0.00    | 60.6 | No  | RR: 1.08<br>(0.56, 2.09)      | 2 |
| Yank 2011 (61)    | Recombinant factor VII                                                                | Thromboembolic events        | 2  | RR: 1.81<br>(0.67, 4.87)      | 0/ 0.00       | RR: 1.88<br>(0.85, 4.16)<br>(0.33, 10.76)        | 0/ 0.00    | 64.5 | No  | RR: 1.88<br>(0.85, 4.16)      | 2 |

|                 |                                                    |                          |    |                          |          |                                           |          |      |     |                          |   |
|-----------------|----------------------------------------------------|--------------------------|----|--------------------------|----------|-------------------------------------------|----------|------|-----|--------------------------|---|
| Zhang 2016 (62) | Everolimus-eluting bioresorbable vascular scaffold | Stent thrombosis         | 3  | OR: 2.22<br>(1.00, 4.93) | 0/ 0.00  | OR: 2.09<br>(1.20, 3.64)<br>(1.04, 4.18)  | 0/ 0.00  | 48.9 | Yes | OR: 2.09<br>(1.20, 3.64) | 2 |
| Zhang 2016 (62) | Everolimus-eluting bioresorbable vascular scaffold | Mortality                | 4  | OR: 0.63<br>(0.24, 1.63) | 0/ 0.00  | OR: 0.73<br>(0.34, 1.57)<br>(0.18, 2.97)  | 15/ 0.20 | 48.3 | No  | OR: 0.82<br>(0.42, 1.60) | 2 |
| Zhang 2016 (62) | Everolimus-eluting bioresorbable vascular scaffold | Cardiac death            | 4  | OR: 0.94<br>(0.43, 2.06) | 0/ 0.00  | OR: 1.05<br>(0.53, 2.12)<br>(0.42, 2.63)  | 0/ 0.00  | 78.6 | No  | OR: 1.05<br>(0.53, 2.12) | 2 |
| Zhang 2017 (63) | Percutaneous coronary intervention                 | Mortality                | 17 | HR: 1.07<br>(0.92, 1.26) | 37/ 0.03 | HR: 1.05<br>(0.93, 1.20)<br>(0.73, 1.52)  | 32/ 0.03 | 74.4 | No  | HR: 1.08<br>(0.98, 1.19) | 2 |
| Zhang 2017 (63) | Percutaneous coronary intervention                 | Cardiovascular mortality | 5  | HR: 1.08<br>(0.51, 2.28) | 78/ 0.49 | HR: 1.05<br>(0.69, 1.59)<br>(0.29, 3.81)  | 72/ 0.25 | 48.8 | No  | HR: 1.33<br>(1.09, 1.62) | 2 |
| Zhang 2017 (63) | Percutaneous coronary intervention                 | Myocardial infarction    | 5  | HR: 2.00<br>(1.65, 2.44) | 0/ 0.00  | HR: 1.69<br>(1.22, 2.33)<br>(0.71, 4.03)  | 57/ 0.12 | 46.3 | No  | HR: 1.66<br>(1.42, 1.94) | 2 |
| Ziff 2015 (64)  | Digoxin                                            | Mortality                | 8  | RR: 1.60<br>(1.31, 1.96) | 63/ 0.05 | RR: 1.38<br>(1.15, 1.66)<br>(0.77, 2.49)  | 75/ 0.06 | 69.8 | No  | RR: 1.08<br>(1.03, 1.14) | 3 |
| Ziff 2015 (64)  | Digoxin                                            | Cardiovascular mortality | 3  | RR: 2.53<br>(1.12, 5.70) | 96/ 0.48 | RR: 1.71<br>(1.04, 2.80)<br>(0.26, 11.38) | 96/ 0.29 | 58.1 | No  | RR: 1.15<br>(1.08, 1.22) | 3 |
| Ziff 2015 (64)  | Digoxin                                            | Hospital admission       | 4  | RR: 0.92<br>(0.85, 0.99) | 64/ 0.00 | RR: 0.93<br>(0.88, 0.98)<br>(0.80, 1.09)  | 61/ 0.00 | 62.2 | No  | RR: 0.92<br>(0.89, 0.95) | 2 |

BCG: Bacillus Calmette-Guérin; BMI: Body Mass Index; BoE: Bodies of Evidence; CE: Common Effects; CI: Confidence Interval; CRC: Colorectal Cancer; CS: Cohort Studies; DDP 4: Dipeptidylpeptidase-4; HIV: Human Immunodeficiency Virus; HR: Hazard Ratio; MD: Mean Difference; NA: Not Applicable; NSTE-ACS: Non-ST-Segment Elevation Acute Coronary Syndromes; OR: Odds Ratio; PI/ECO: Population – Intervention/Exposure – Comparator – Outcome; RCT: Randomized Controlled Trial; RE: Random Effects; RR: Risk Ratio; SGLT-2: Sodium Dependent Glucose Transporter 2;

\* PI/ECO similarity degree: 1=more or less identical; 2=similar but not identical; 3=broadly similar;



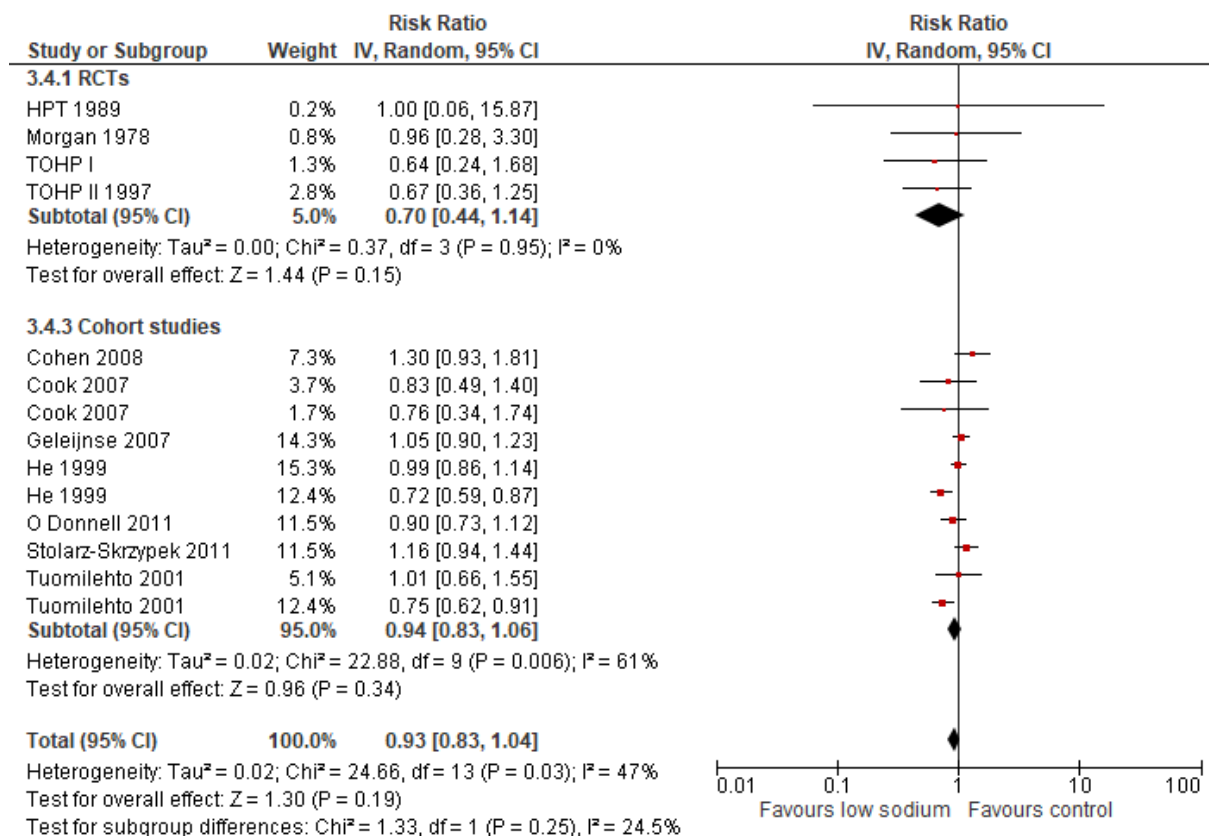

**Figure S1:** Aburto 2013; Intervention/ Exposure: Low sodium; Outcome: All-cause mortality

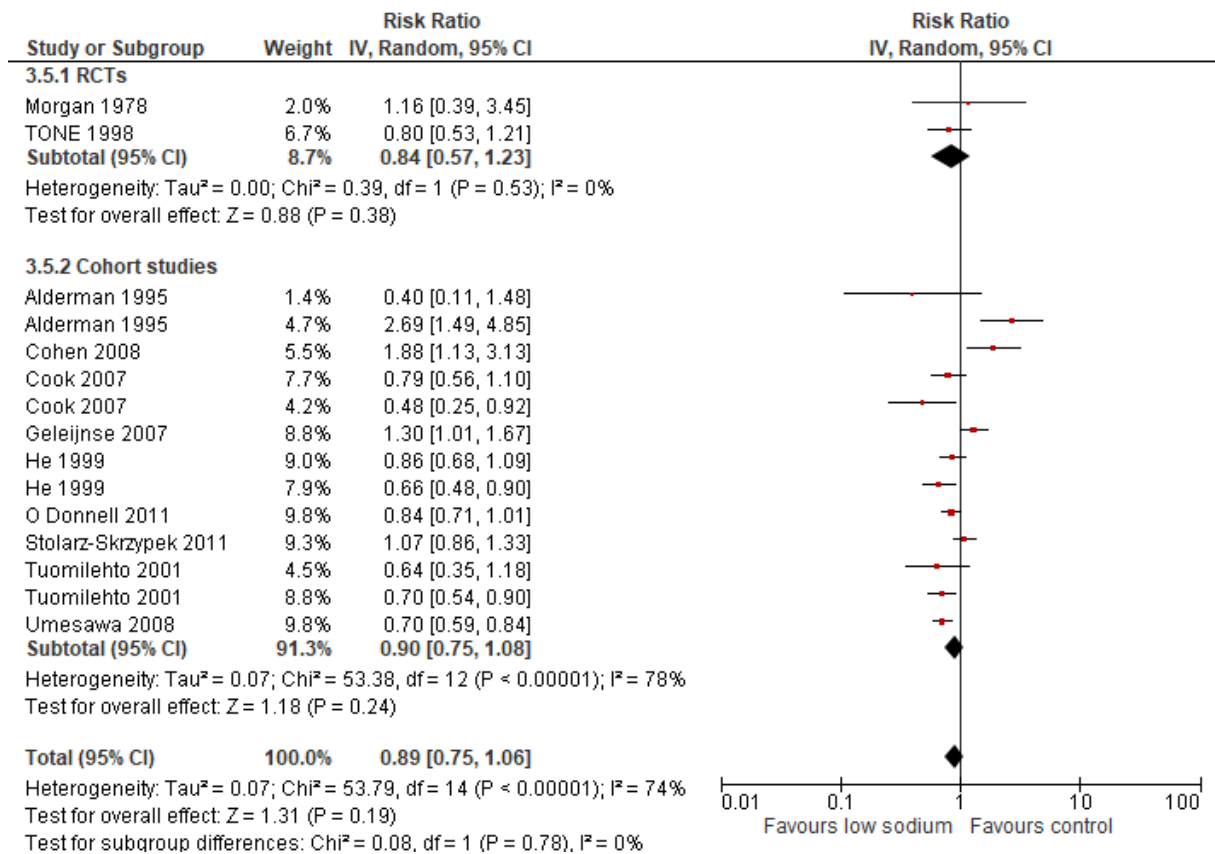

**Figure S2:** Aburto 2013; Intervention/ Exposure: Low-sodium; Outcome: Cardiovascular disease

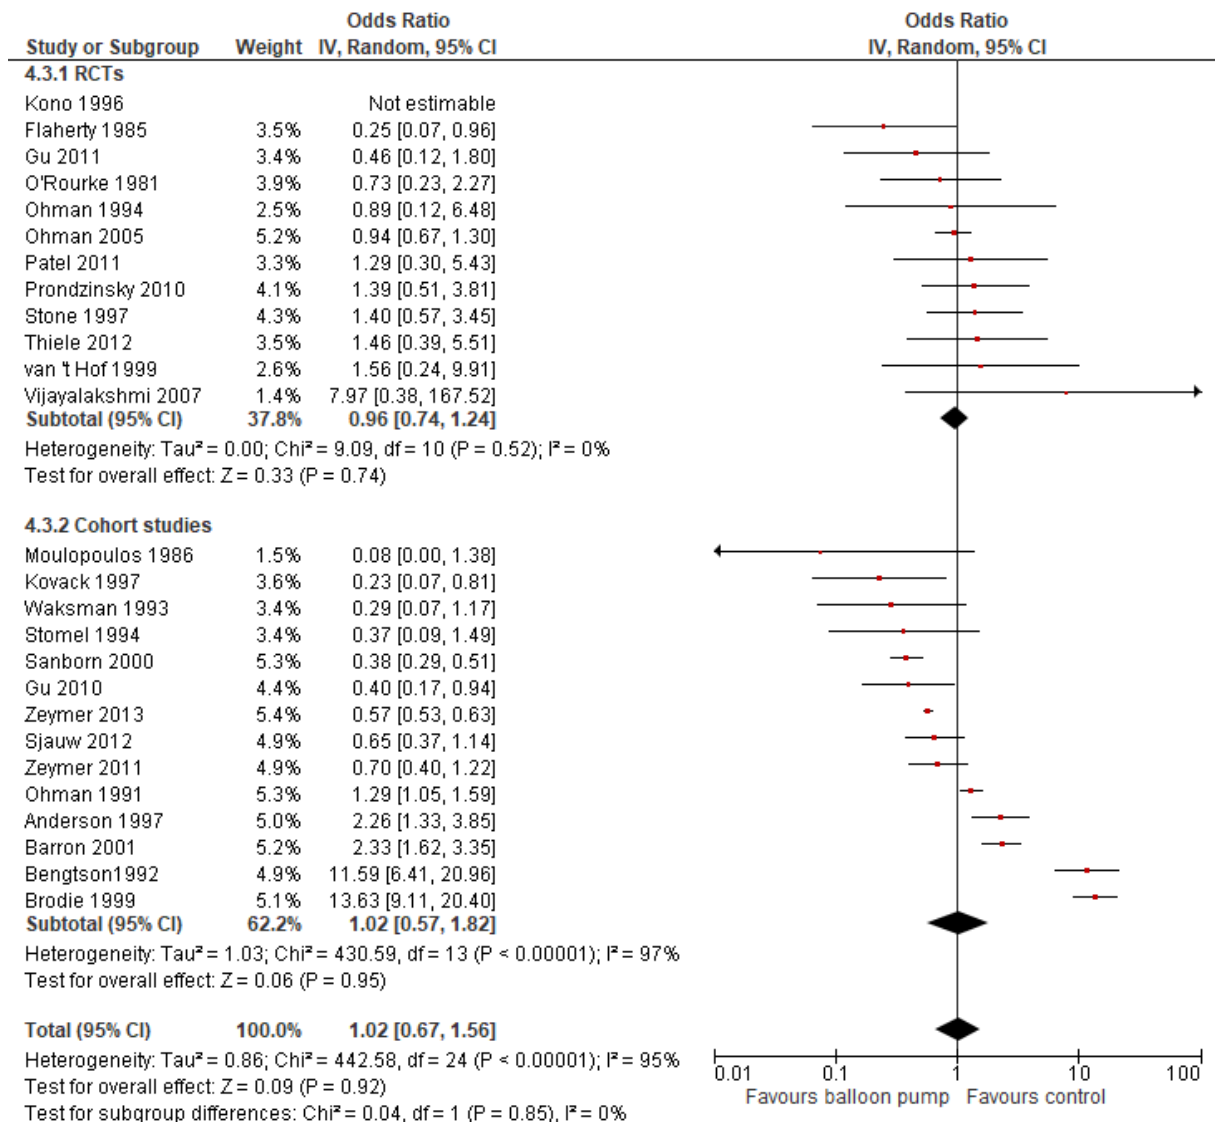

**Figure S3:** Ahmad 2015; Intervention/ Exposure: Intra-aortic balloon pump; Outcome: All-cause mortality

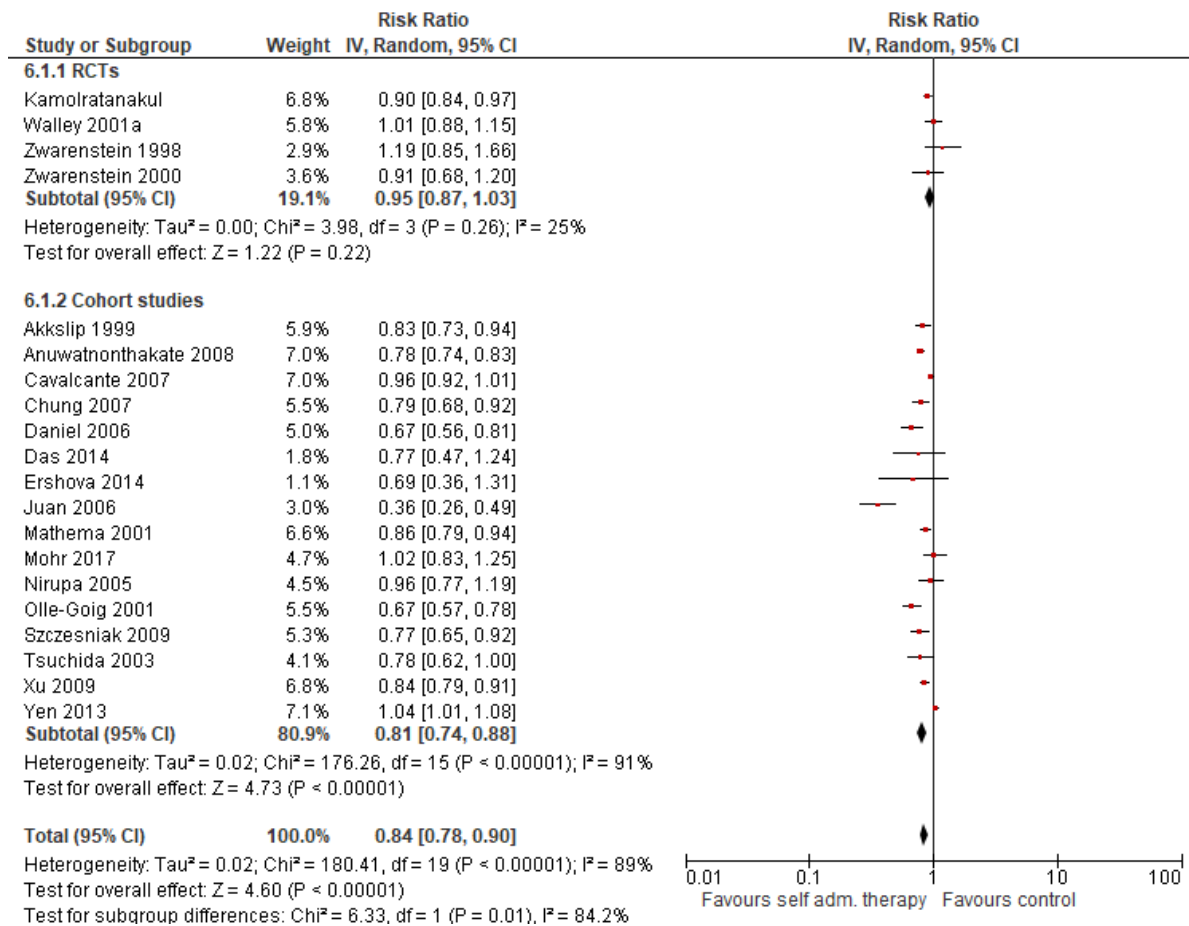

**Figure S4:** Alipanah 2018; Intervention/ Exposure: Self-administered therapy; Outcome: Treatment success (Risk Ratio >1 indicates a favorable effect)

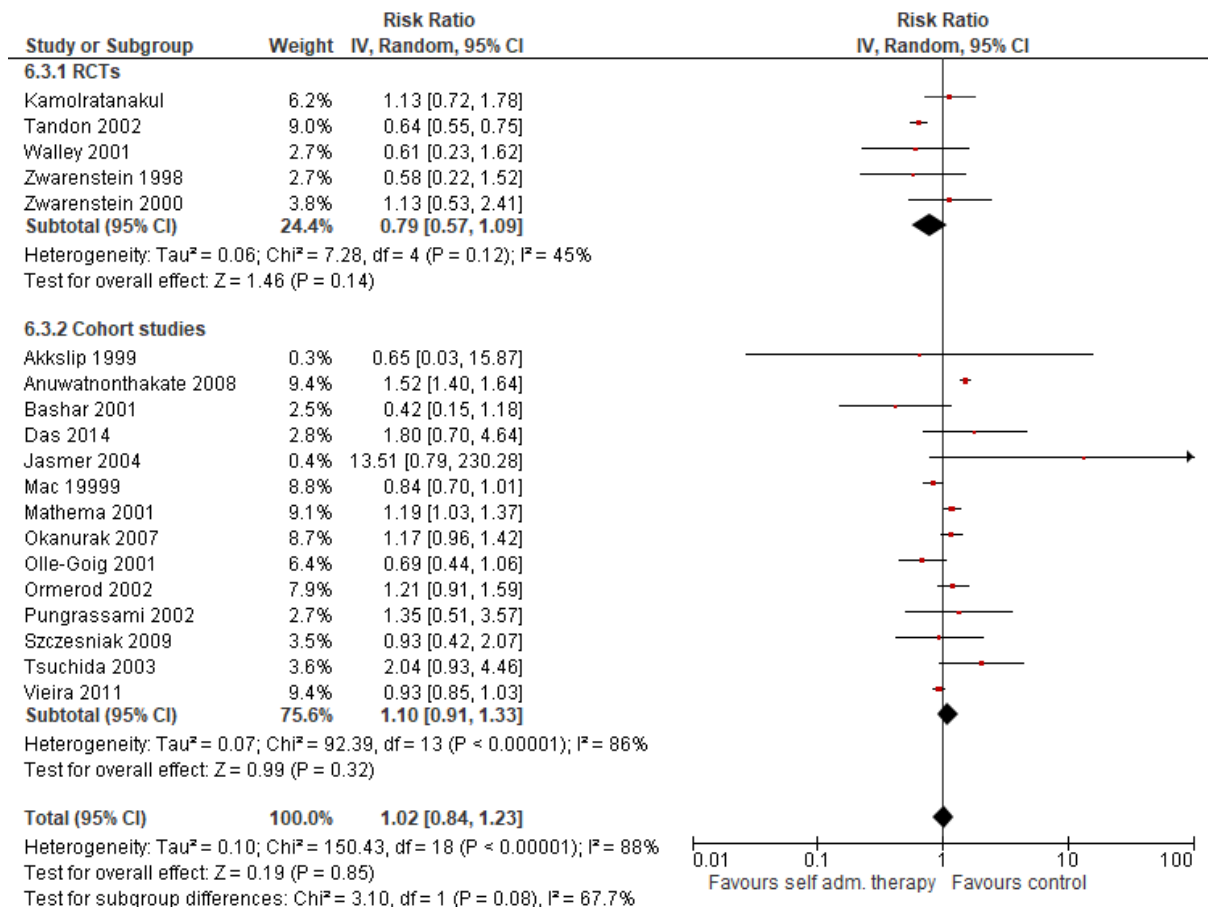

**Figure S5:** Alipanah 2018; Intervention/ Exposure: Self-administered therapy; Outcome: Treatment completion (Risk Ratio >1 indicates a favorable effect)

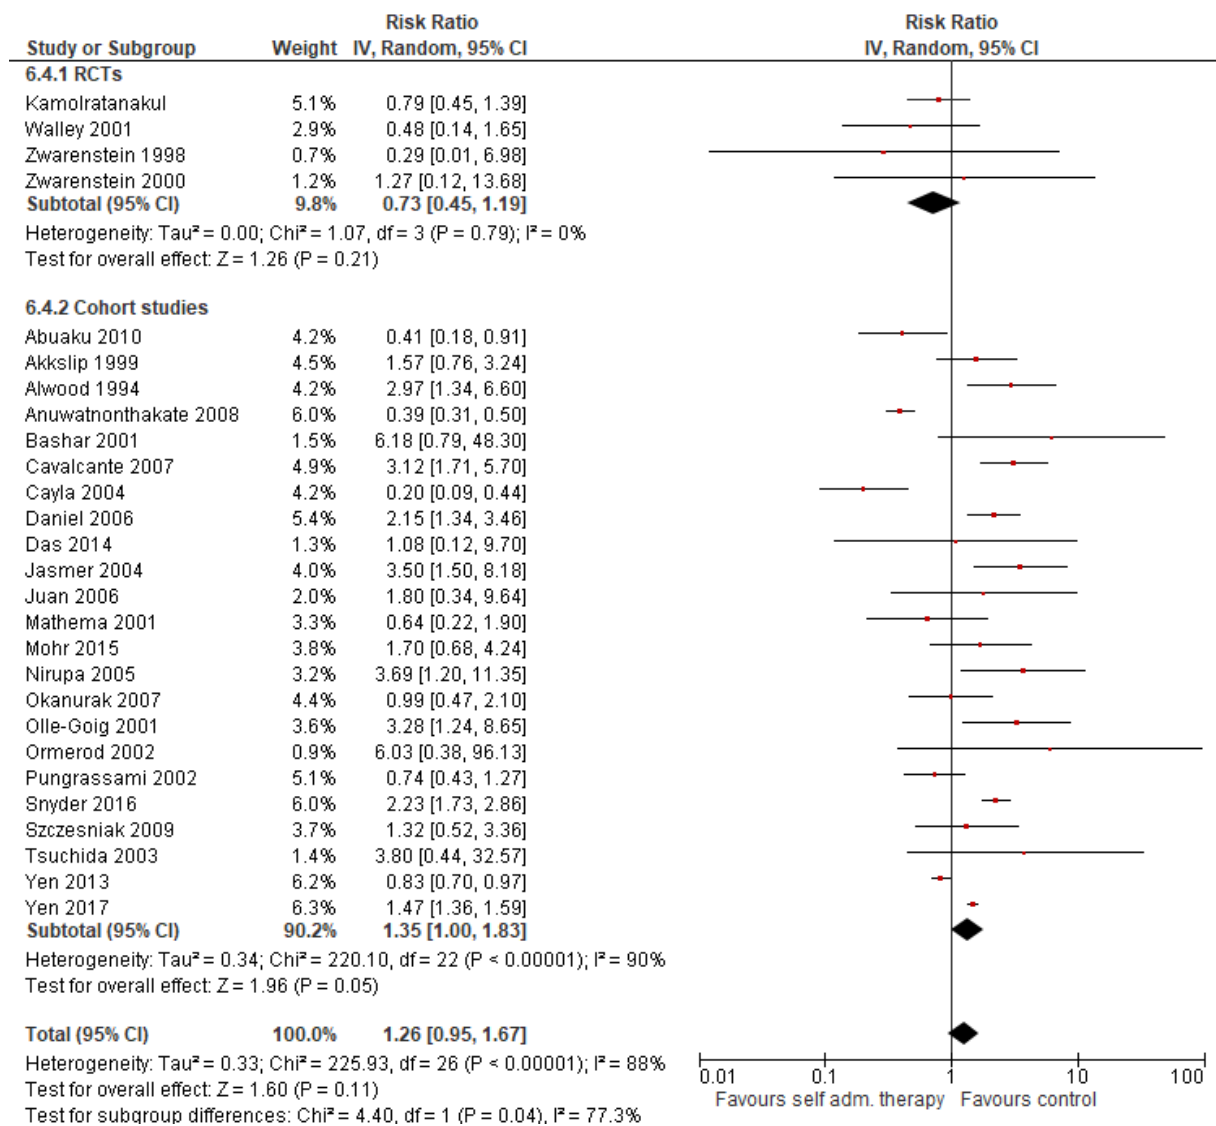

**Figure S6:** Alipanah 2018; Intervention/ Exposure: Self-administered therapy; Outcome: All-cause mortality

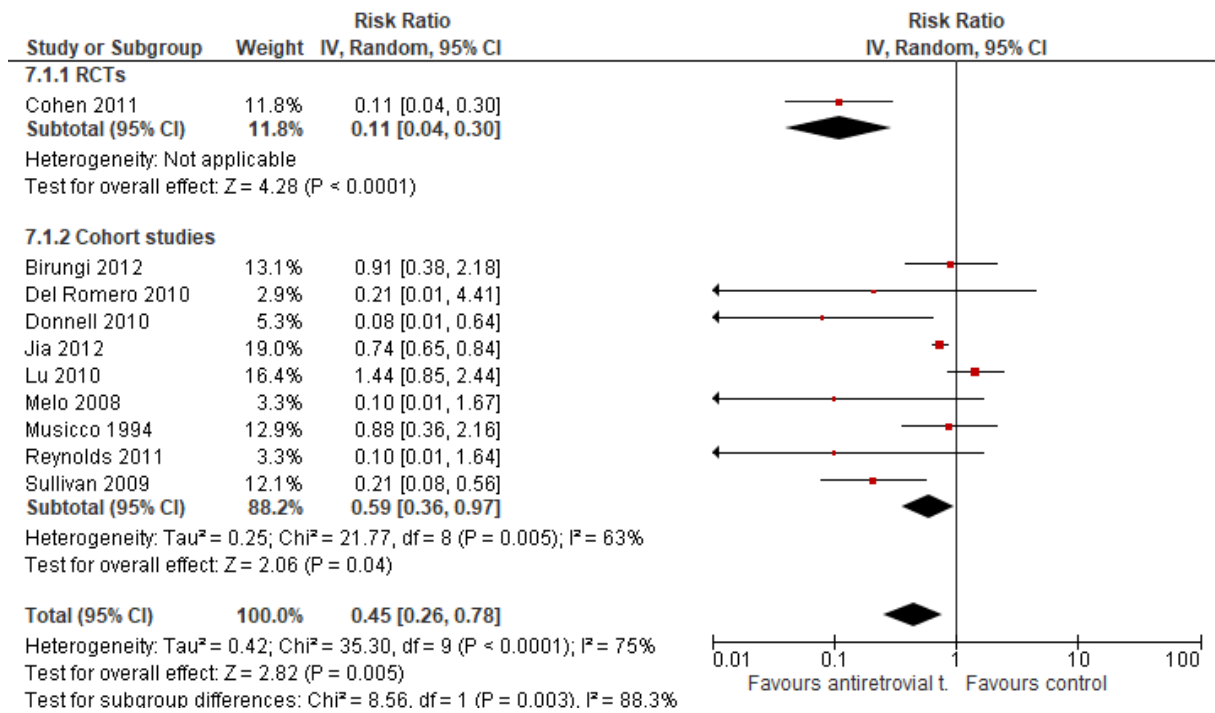

**Figure S7:** Anglemyer 2013; Intervention/ Exposure: Antiretroviral therapy; Outcome: HIV infection

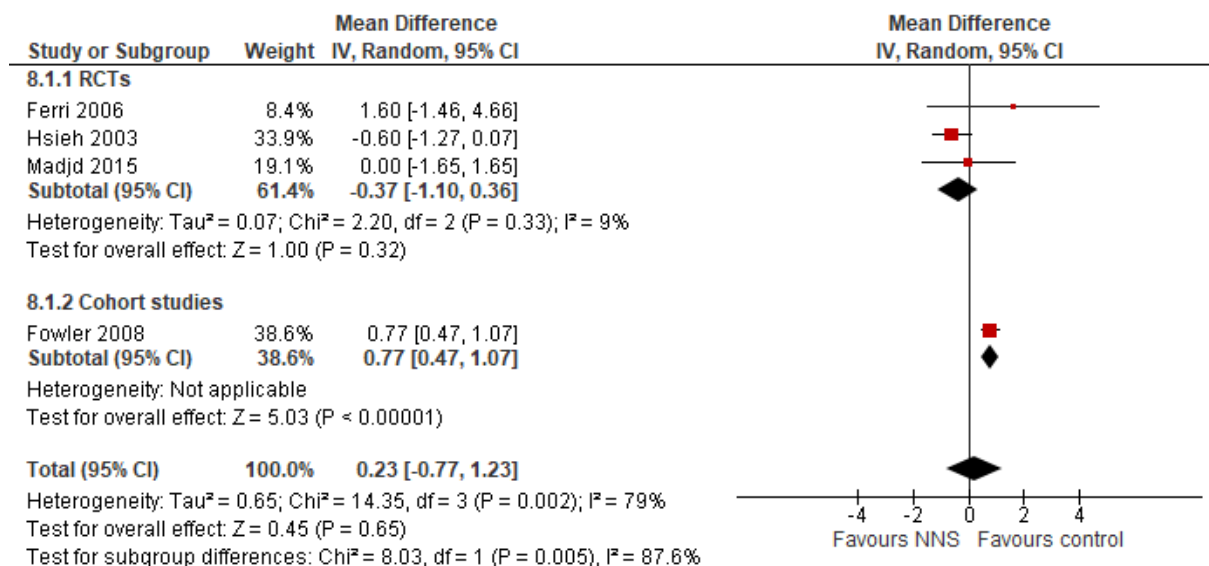

**Figure S8:** Azad 2017; Intervention/ Exposure: Nonnutritive sweeteners; Outcome: Body Mass Index



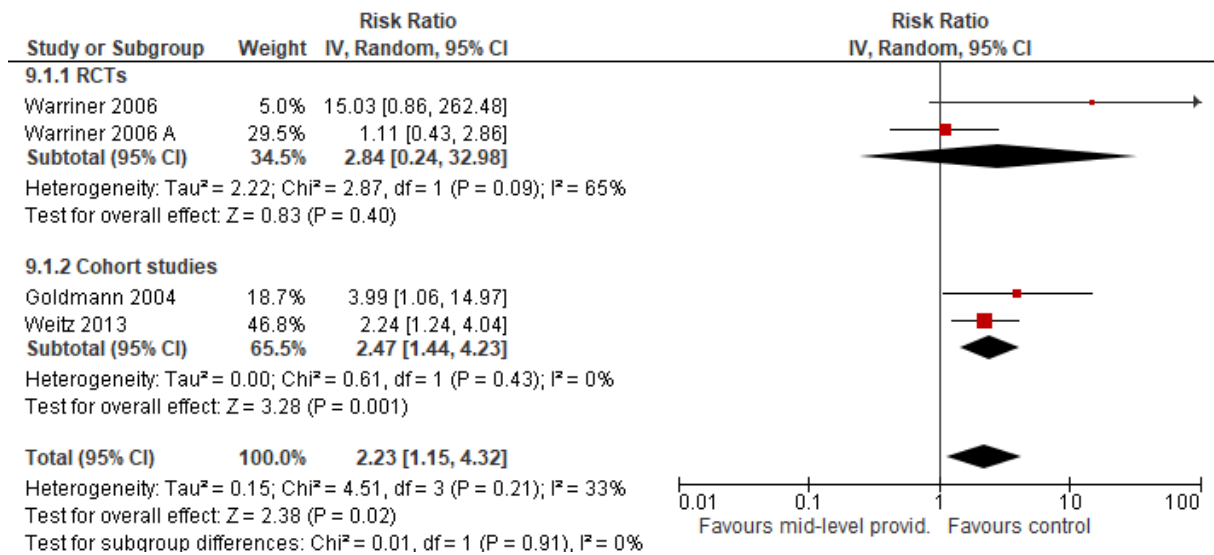

**Figure S9:** Barnard 2015; Intervention/ Exposure: Surgical abortion by mid-level providers; Outcome: Failure or incomplete abortion

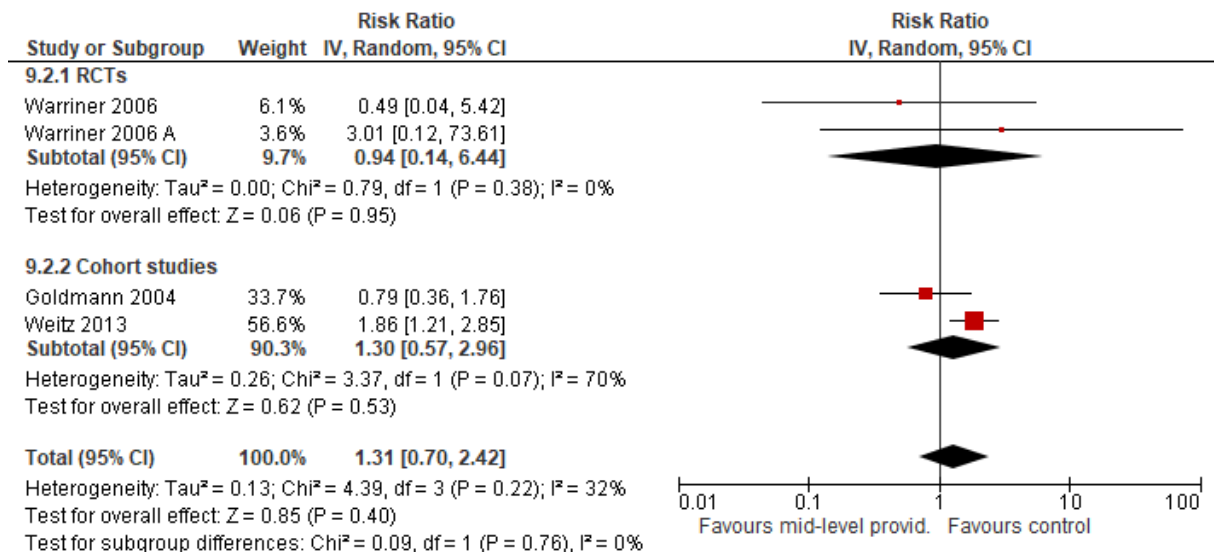

**Figure S10:** Barnard 2015; Intervention/ Exposure: Surgical abortion by mid-level providers; Outcome: Complications

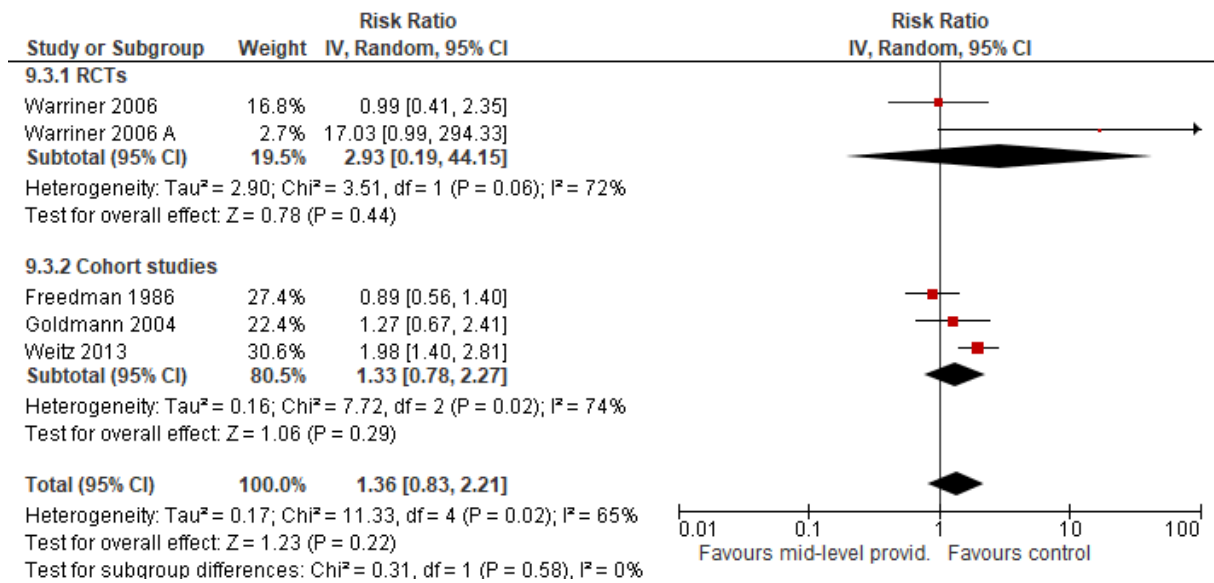

**Figure S11:** Barnard 2015; Intervention/ Exposure: Surgical abortion by mid-level providers; Outcome: Abortion failure and complications

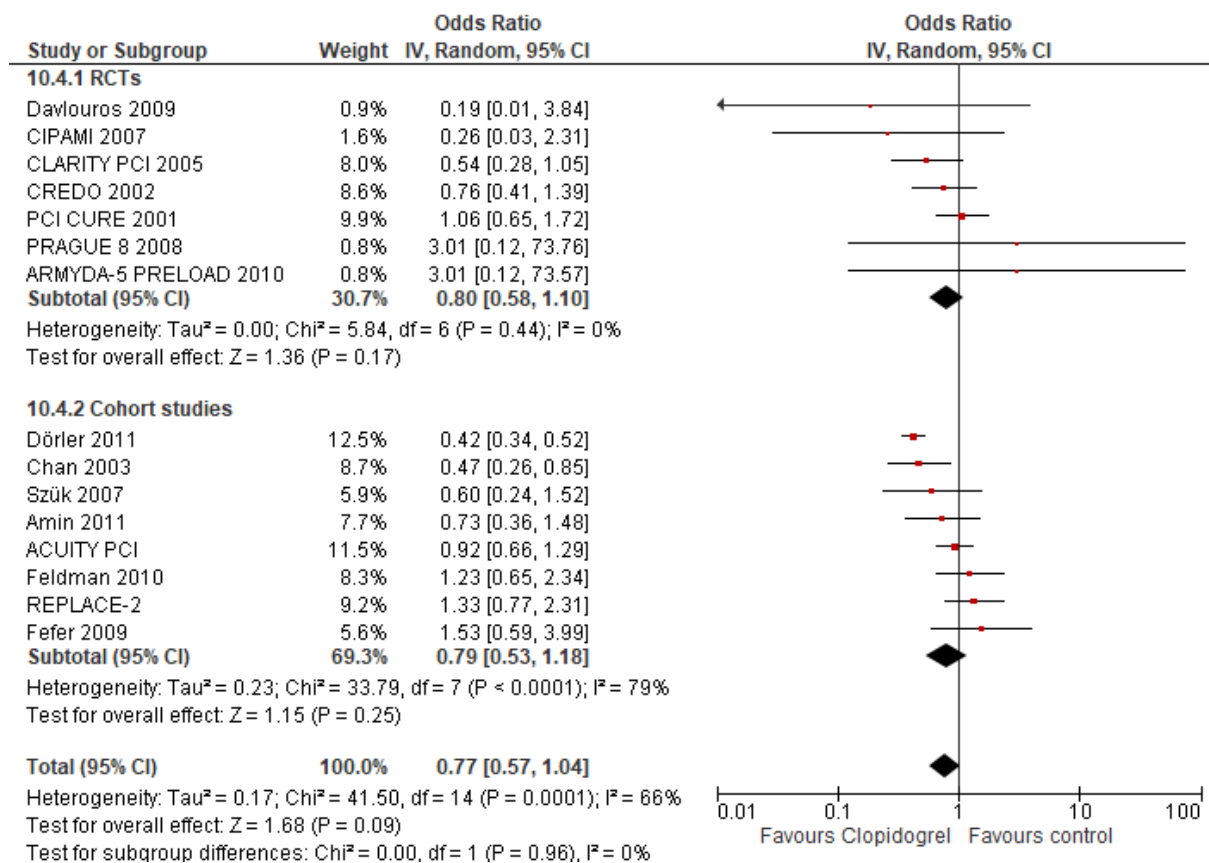

**Figure S12:** Bellemain-Appaix 2012; Intervention/ Exposure: Clopidogrel pretreatment for percutaneous coronary intervention; Outcome: All-cause mortality

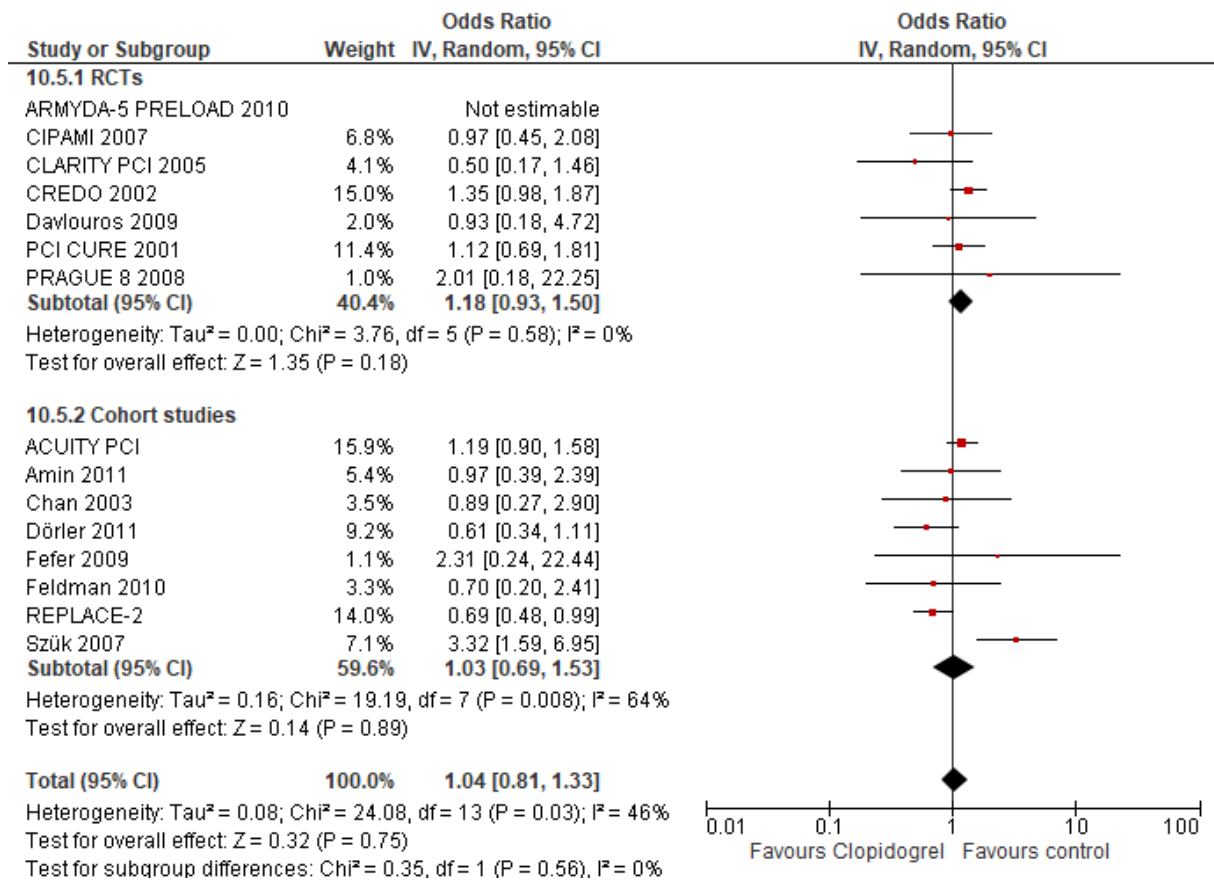

**Figure S13:** Bellemin-Appaix 2012; Intervention/ Exposure: Clopidogrel pretreatment for percutaneous coronary intervention; Outcome: Major bleeding

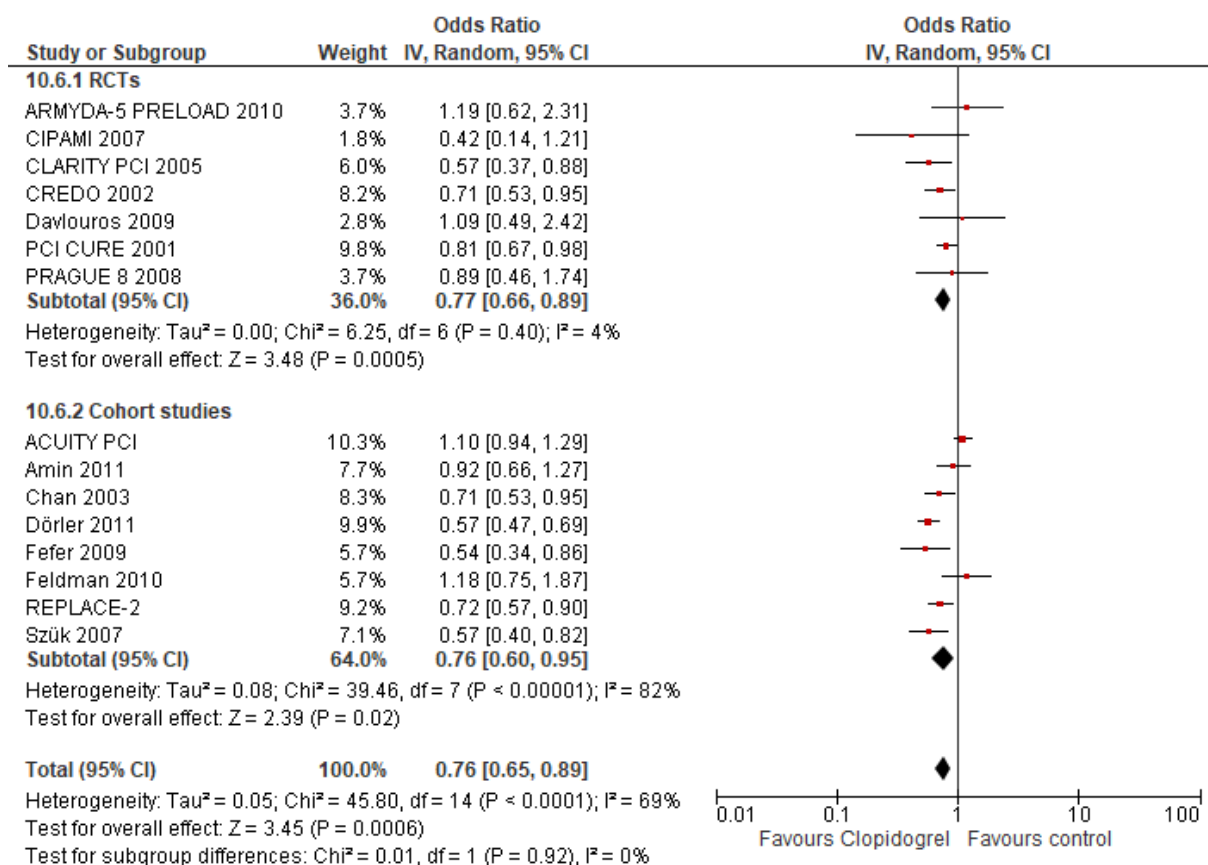

**Figure S14:** Bellemain-Appaix 2012; Intervention/ Exposure: Clopidogrel pretreatment for percutaneous coronary intervention; Outcome: Coronary heart disease

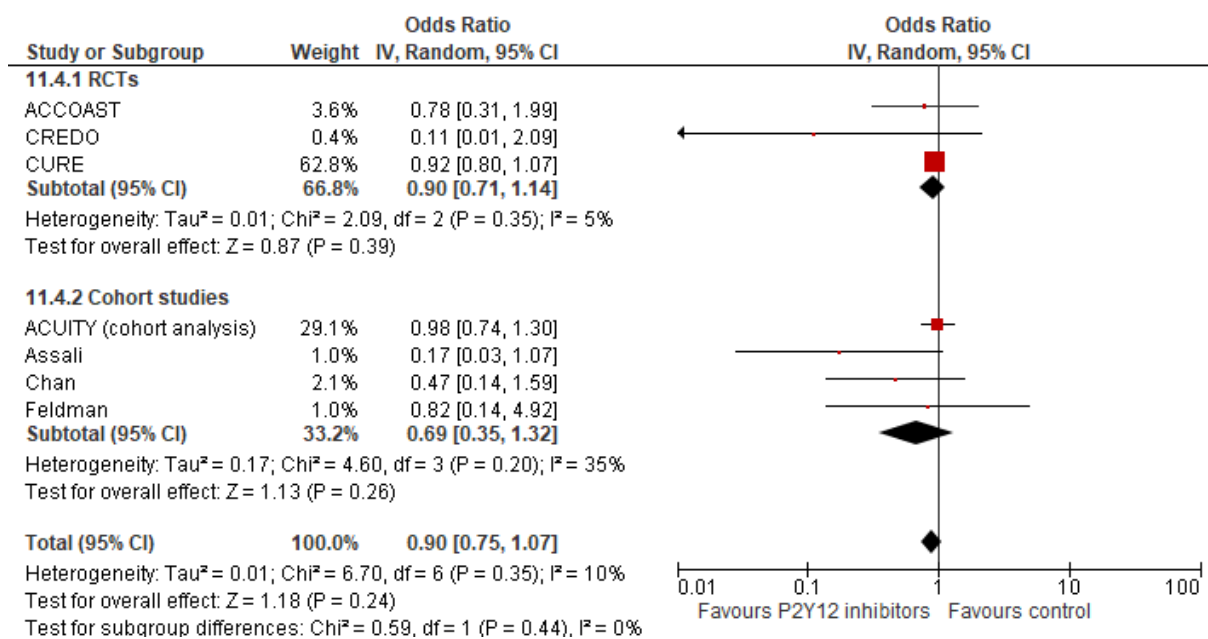

**Figure S15:** Bellemain-Appaix 2014; Intervention/ Exposure: P2Y12 inhibitor pretreatment in non-ST elevation acute coronary syndrome; Outcome: All-cause mortality

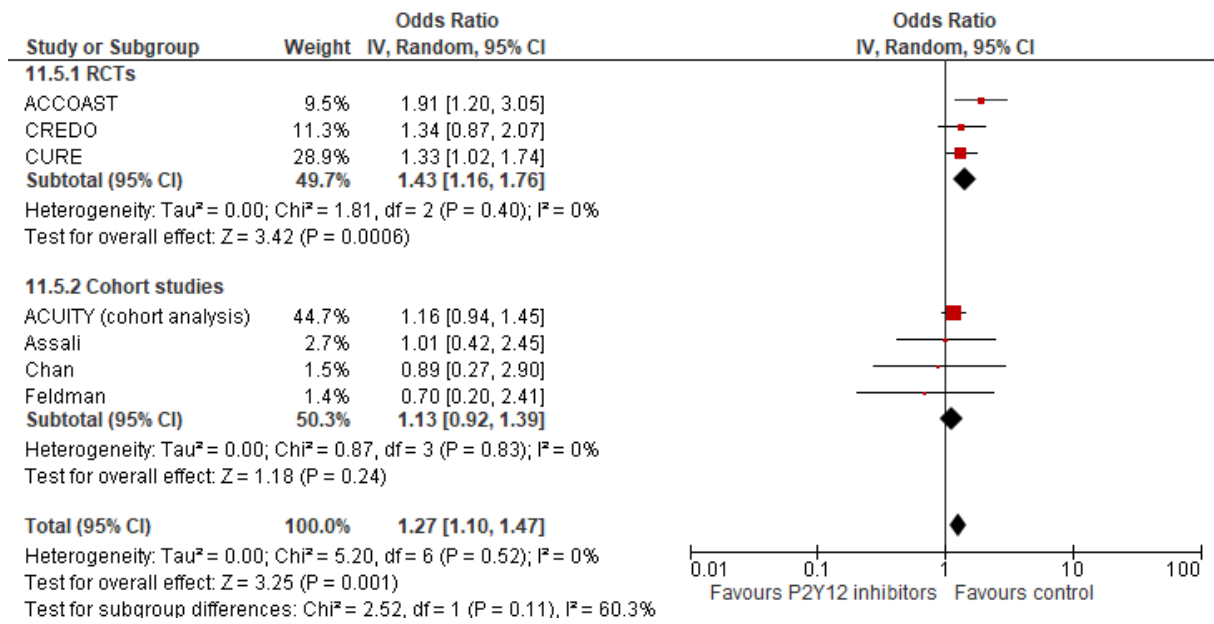

**Figure S16:** Bellemain-Appaix 2014; Intervention/ Exposure: P2Y12 inhibitor pretreatment in non-ST elevation acute coronary syndrome; Outcome: Major bleeding



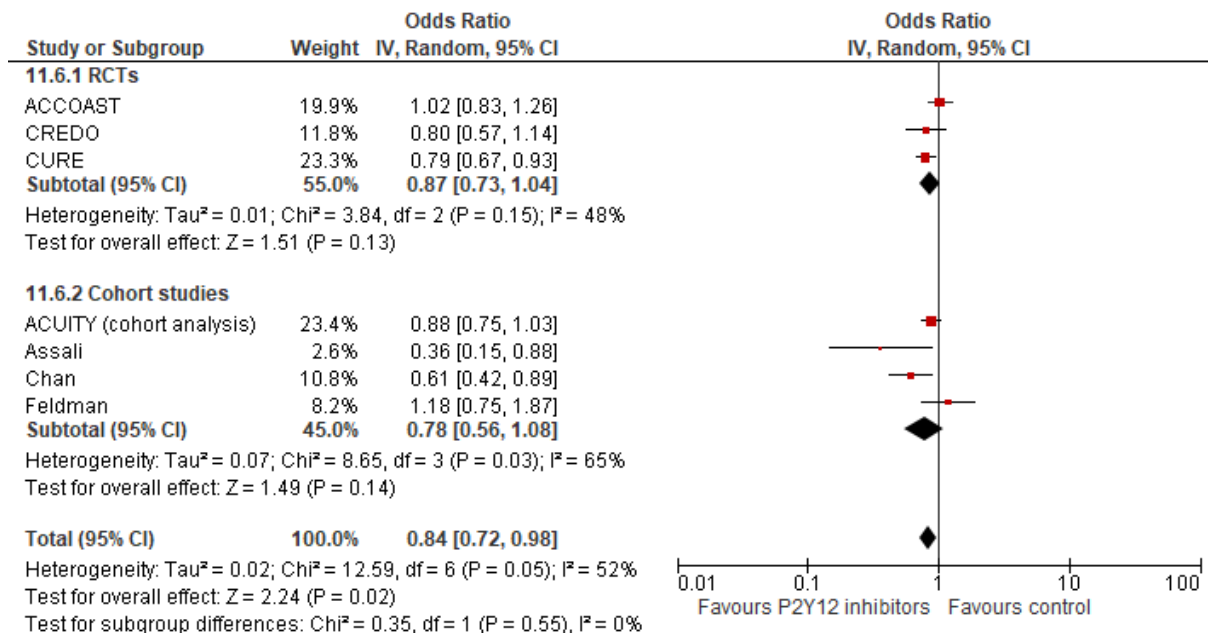

**Figure S17:** Bellemain-Appaix 2014; Intervention/ Exposure: P2Y12 inhibitor pretreatment in non-ST elevation acute coronary syndrome; Outcome: Main composite ischemic endpoint

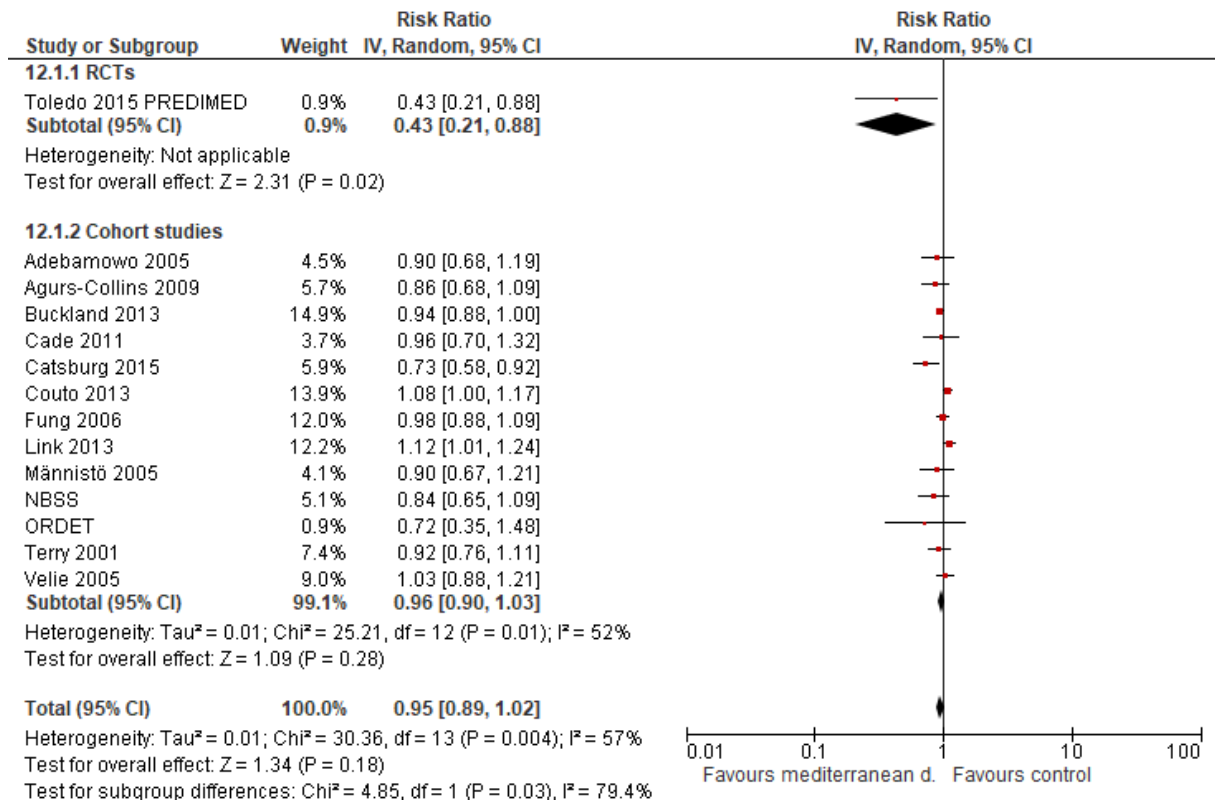

**Figure S18:** Bloomfield 2016; Intervention/ Exposure: Mediterranean diet; Outcome: Breast cancer

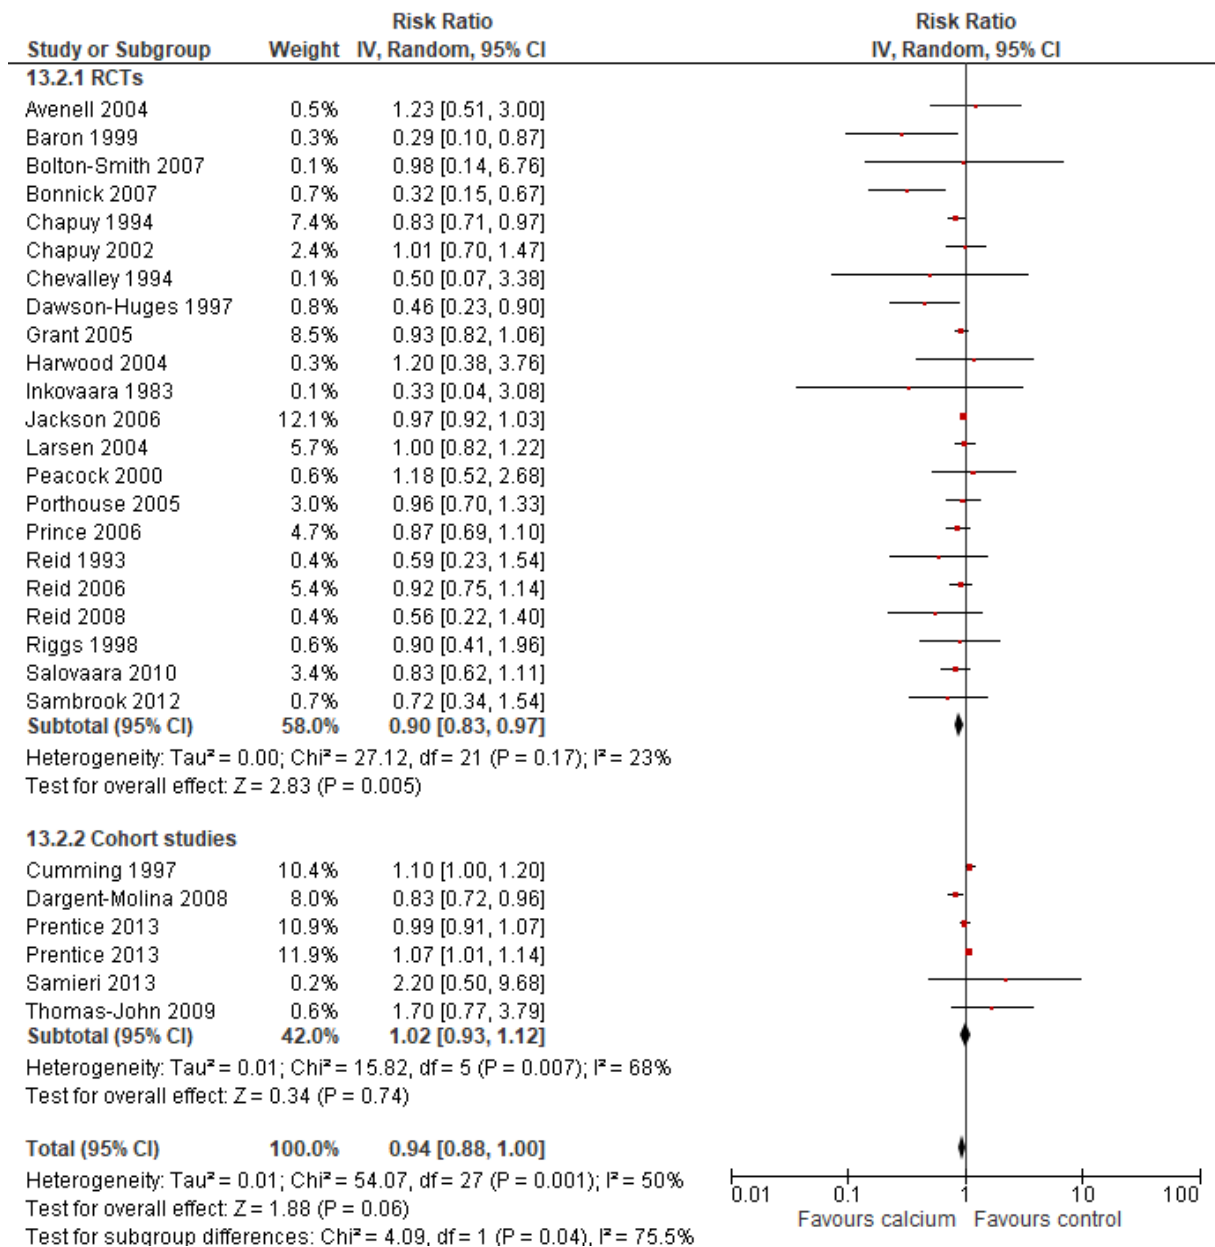

**Figure S19:** Bolland 2015; Intervention/ Exposure: High calcium; Outcome: All fractures

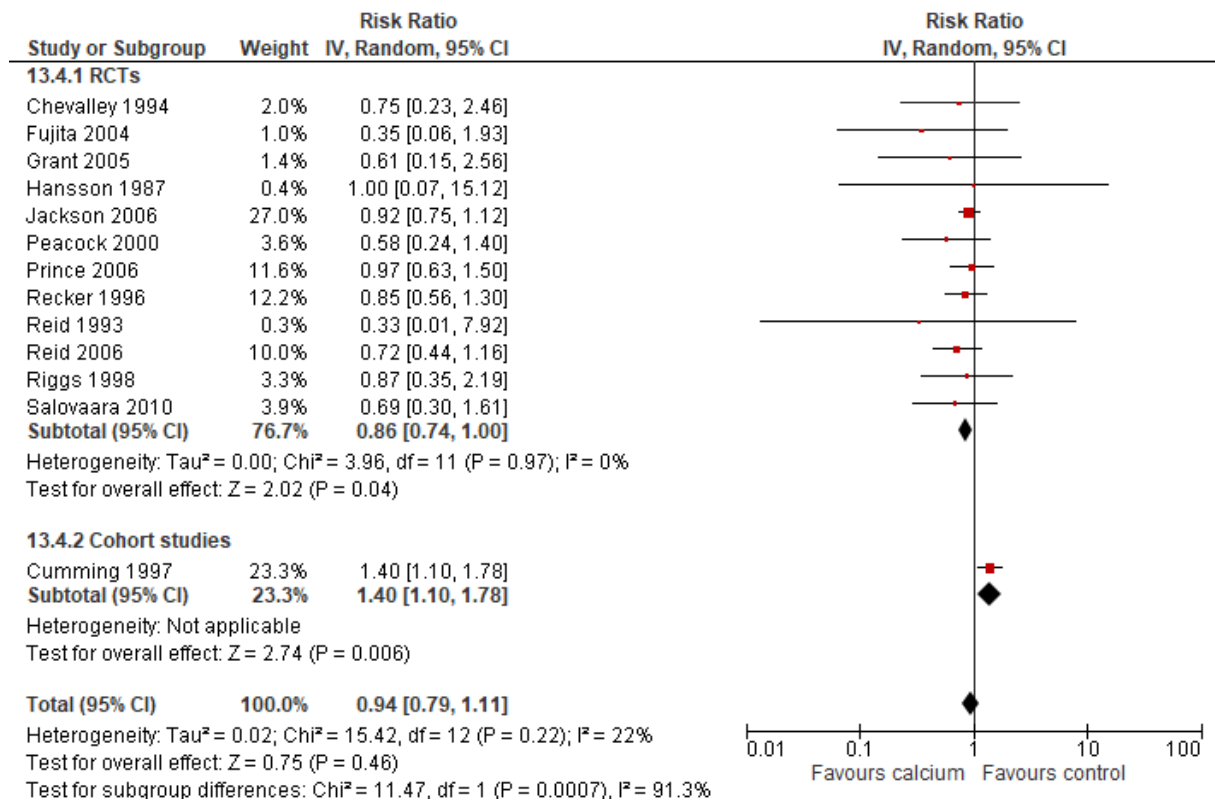

**Figure S20:** Bolland 2015; Intervention/ Exposure: High calcium; Outcome: Vertebral fracture

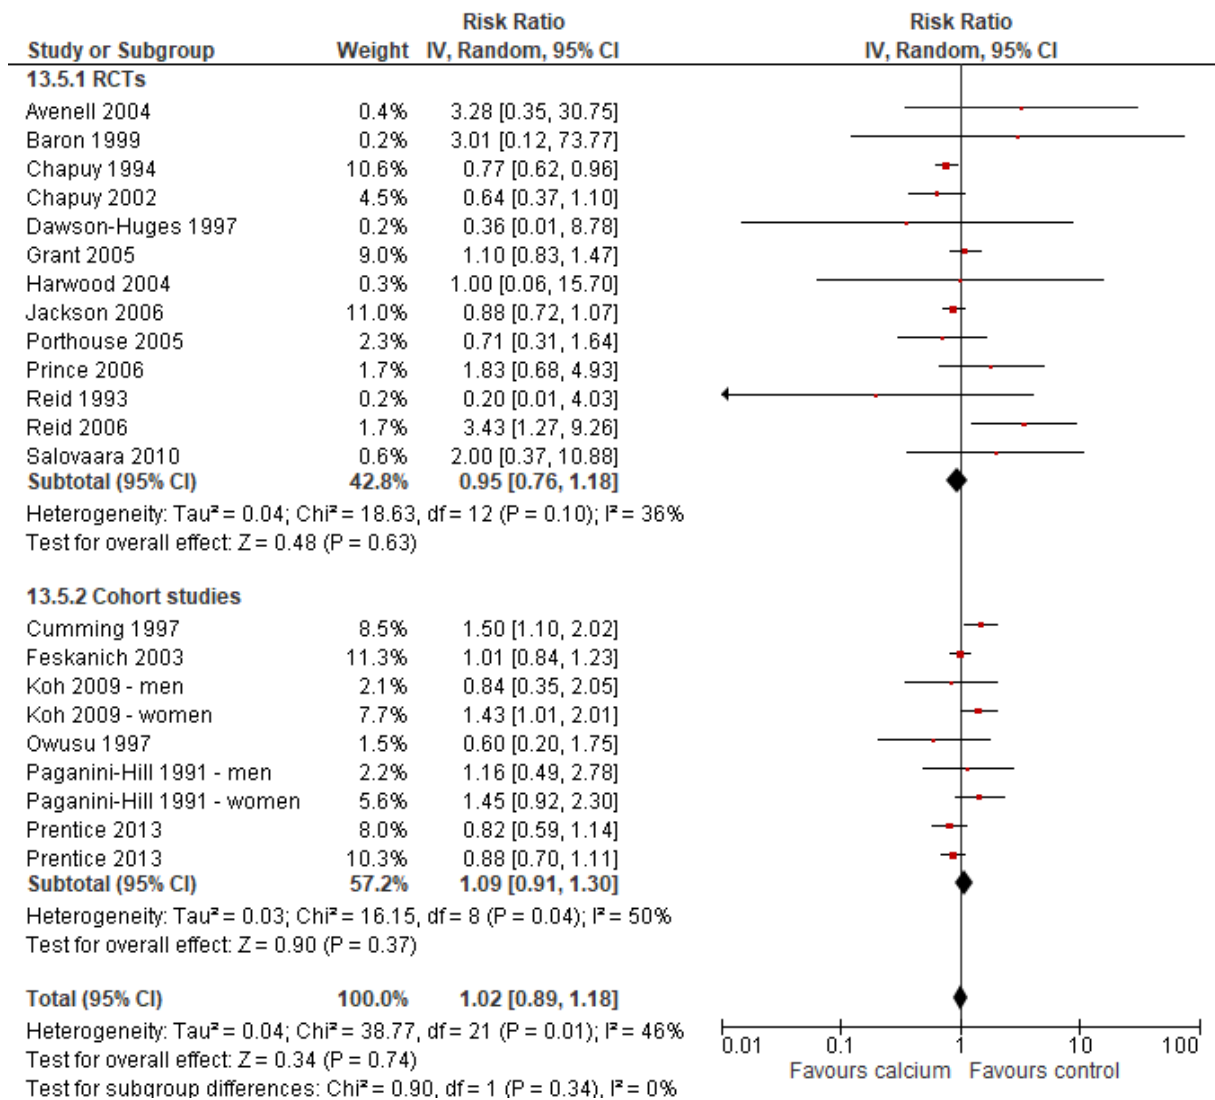

**Figure S21:** Bolland 2015; Intervention/ Exposure: High calcium; Outcome: Hip fracture

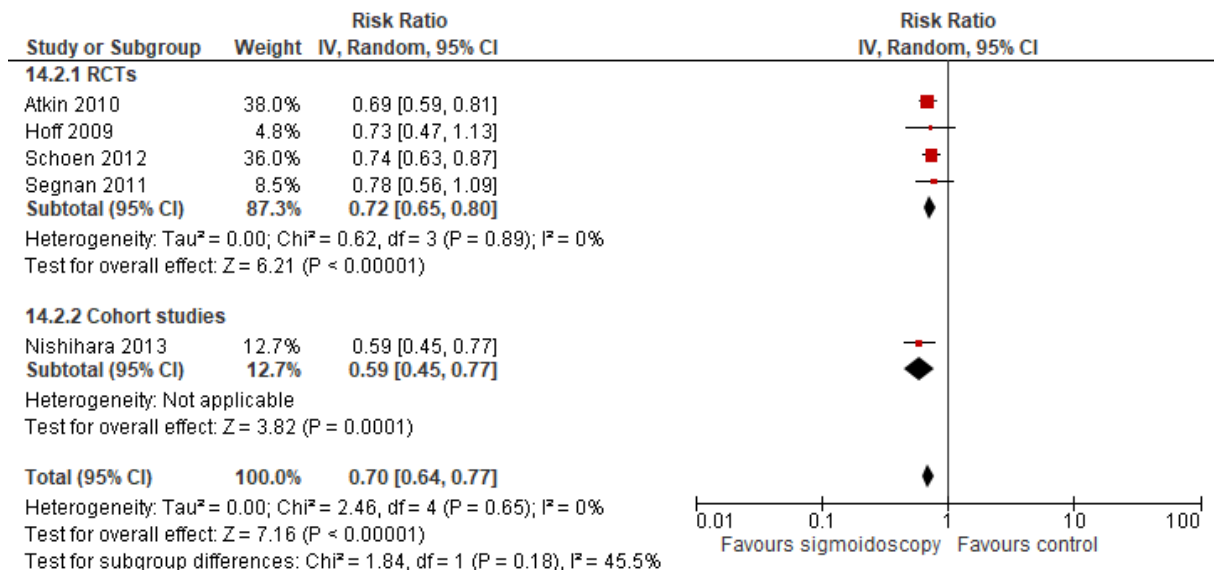

**Figure S22:** Brenner 2014; Intervention/ Exposure: Sigmoidoscopy; Outcome: Colorectal cancer mortality

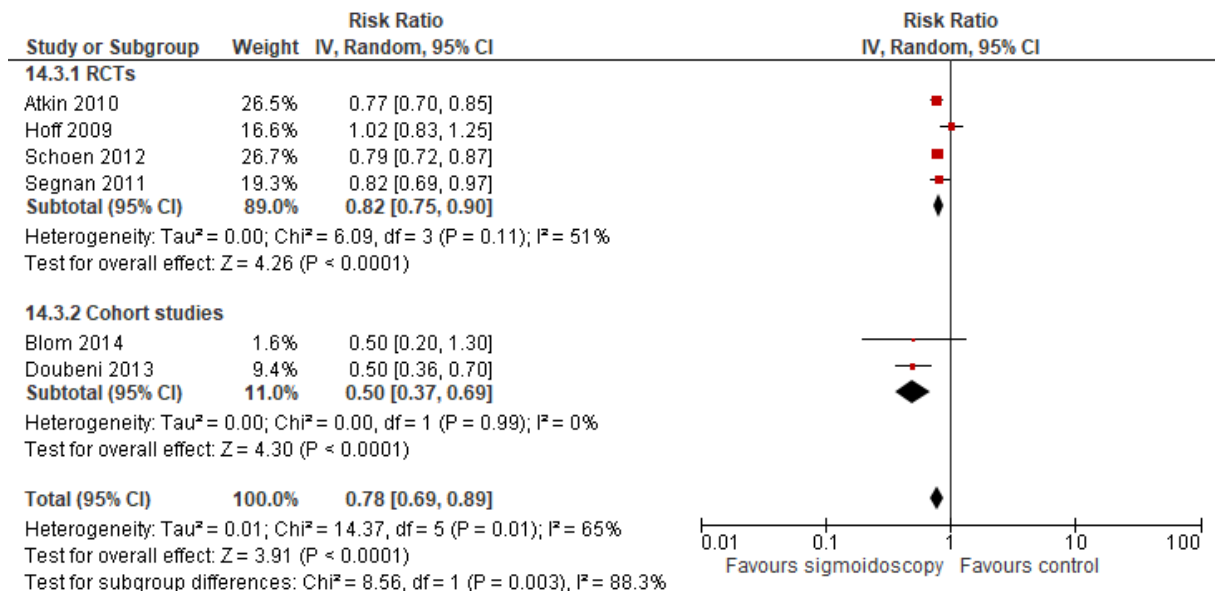

**Figure S23:** Brenner 2014; Intervention/ Exposure: Sigmoidoscopy; Outcome: Colorectal cancer incidence

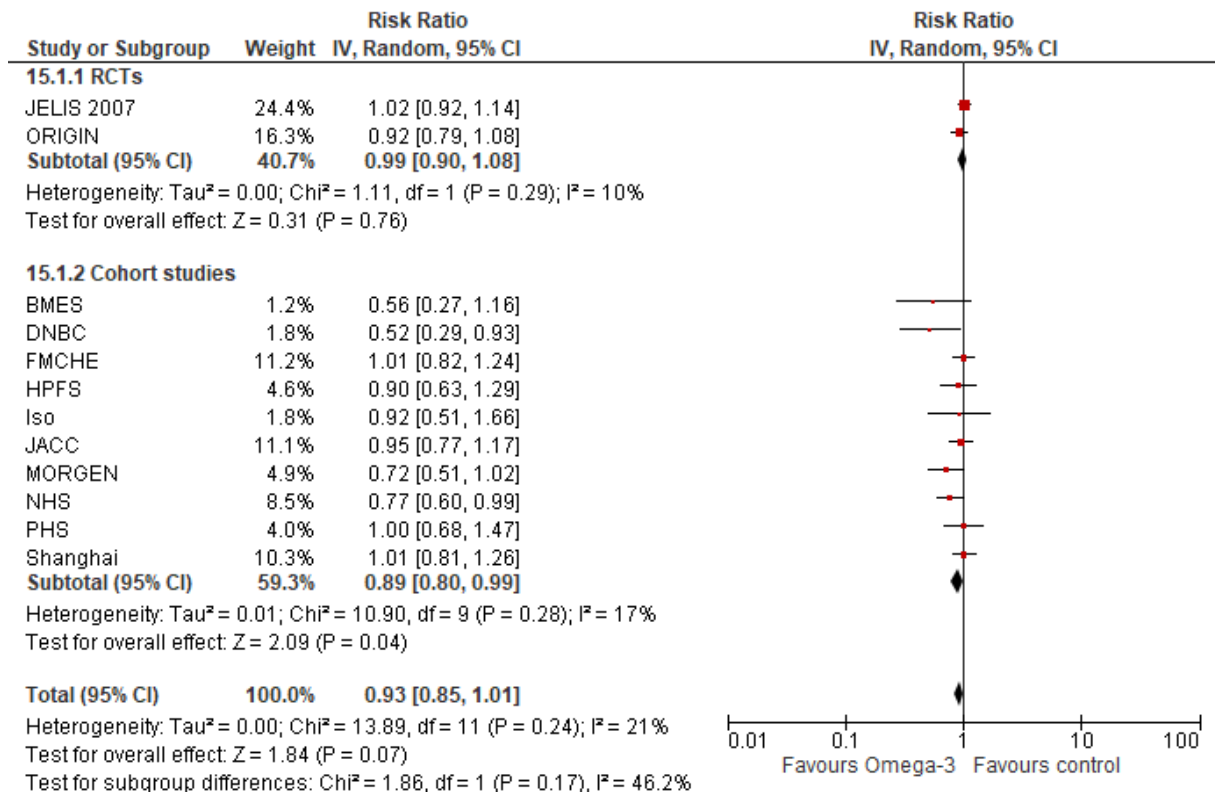

**Figure S24:** Chowdhury 2012; Intervention/ Exposure: High omega-3; Outcome: Cerebrovascular disease



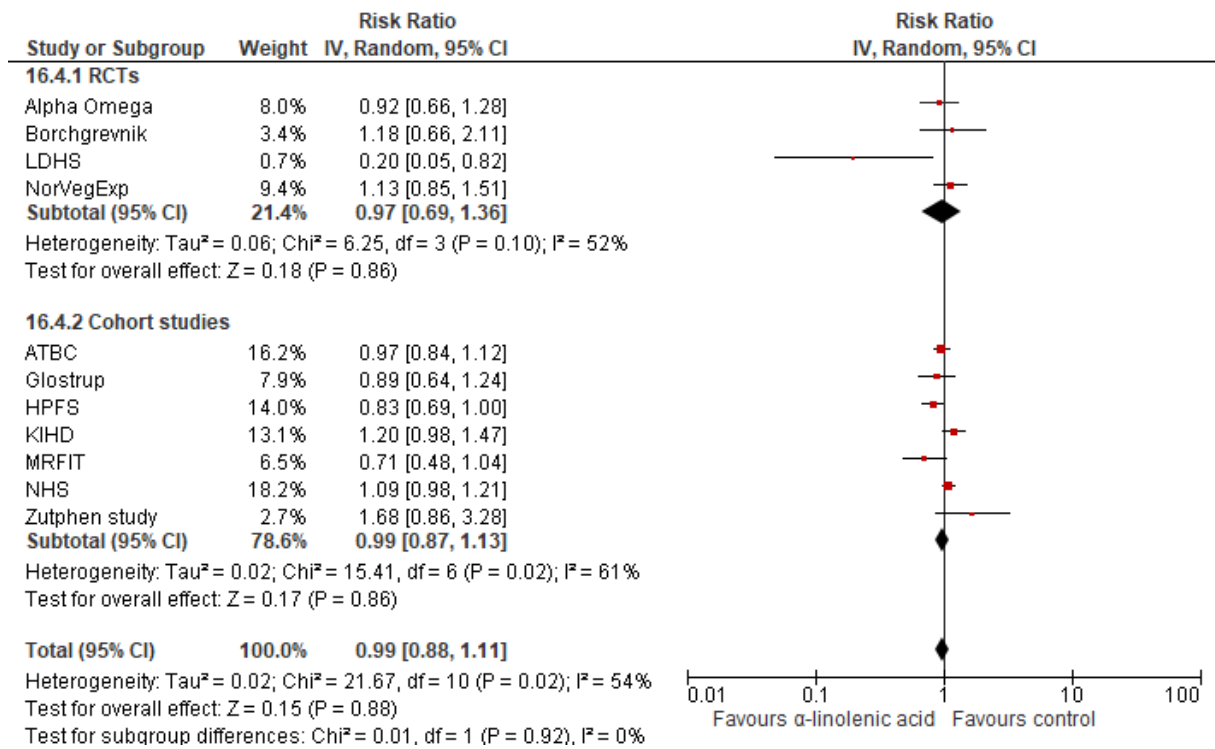

**Figure S25:** Chowdhury 2014a; Intervention/ Exposure: High  $\alpha$ -linolenic acid; Outcome: Coronary heart disease

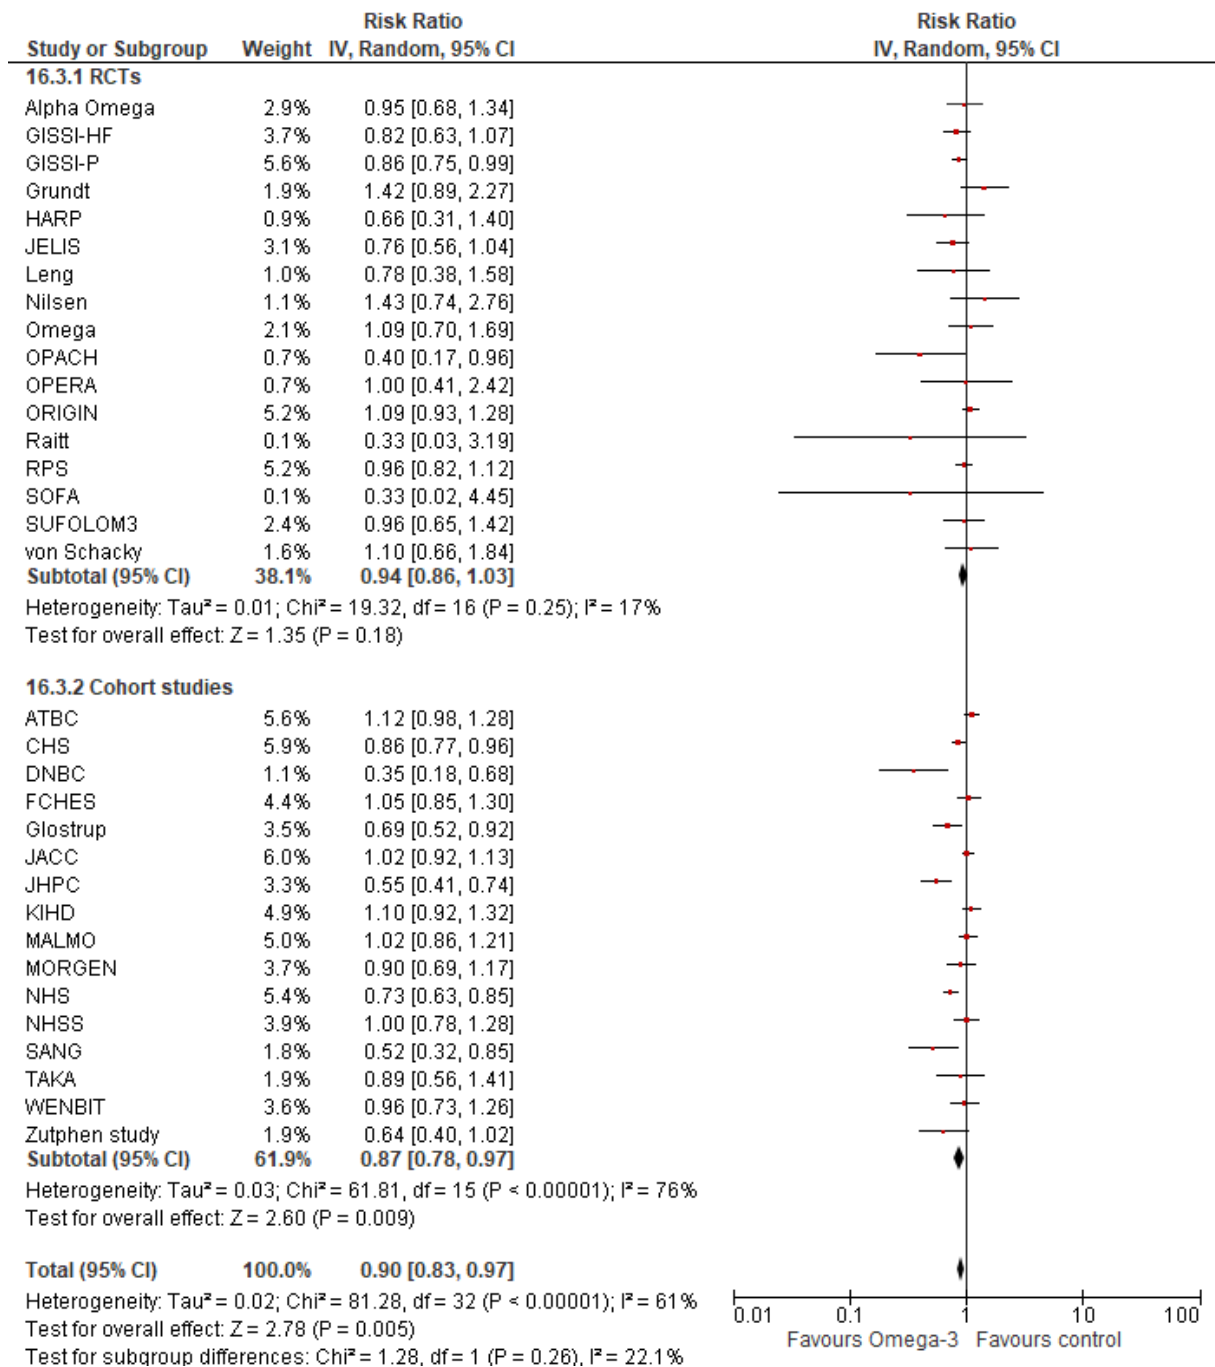

**Figure S26:** Chowdhury 2014a; Intervention/ Exposure: High omega-3; Outcome: Coronary heart disease

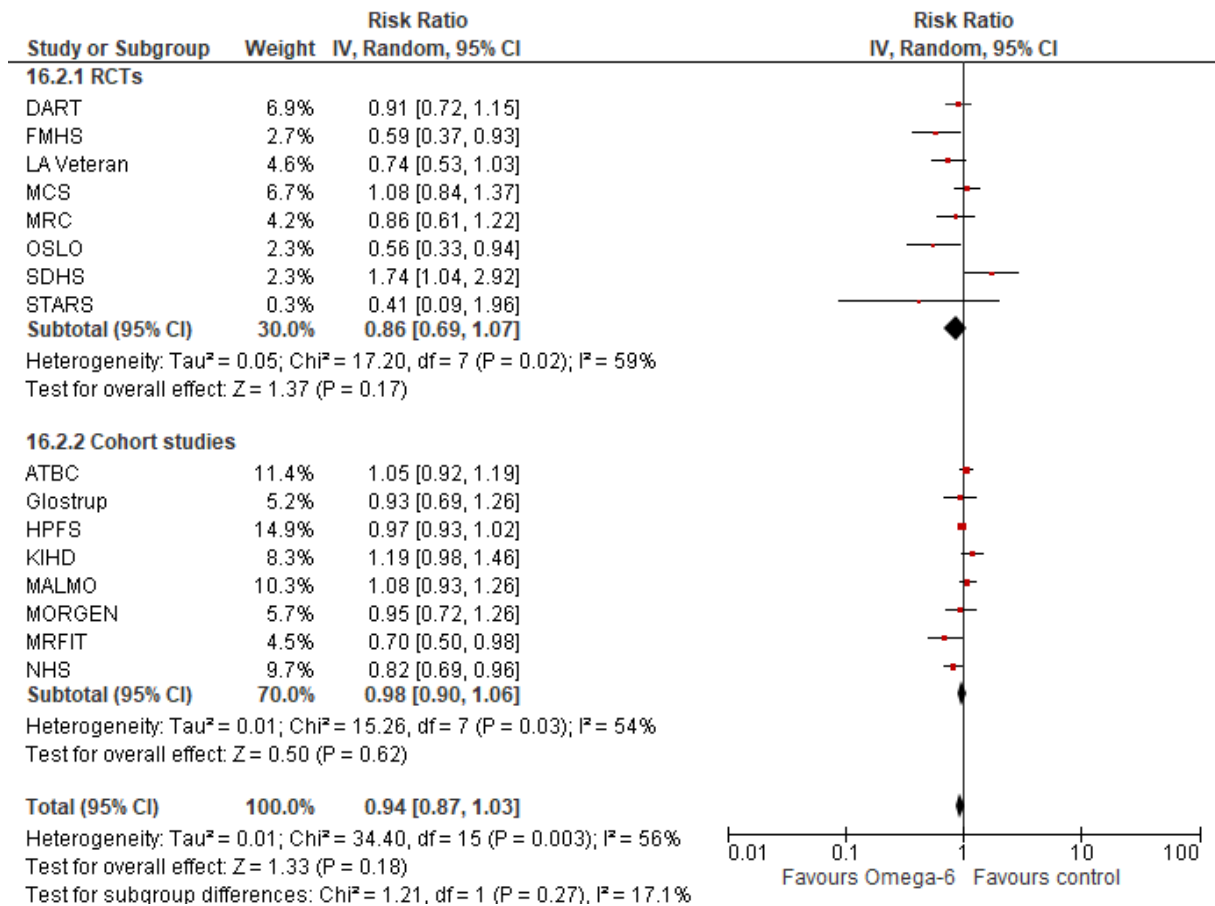

**Figure S27:** Chowdhury 2014a; Intervention/ Exposure: Omega-6; Outcome: Coronary heart disease

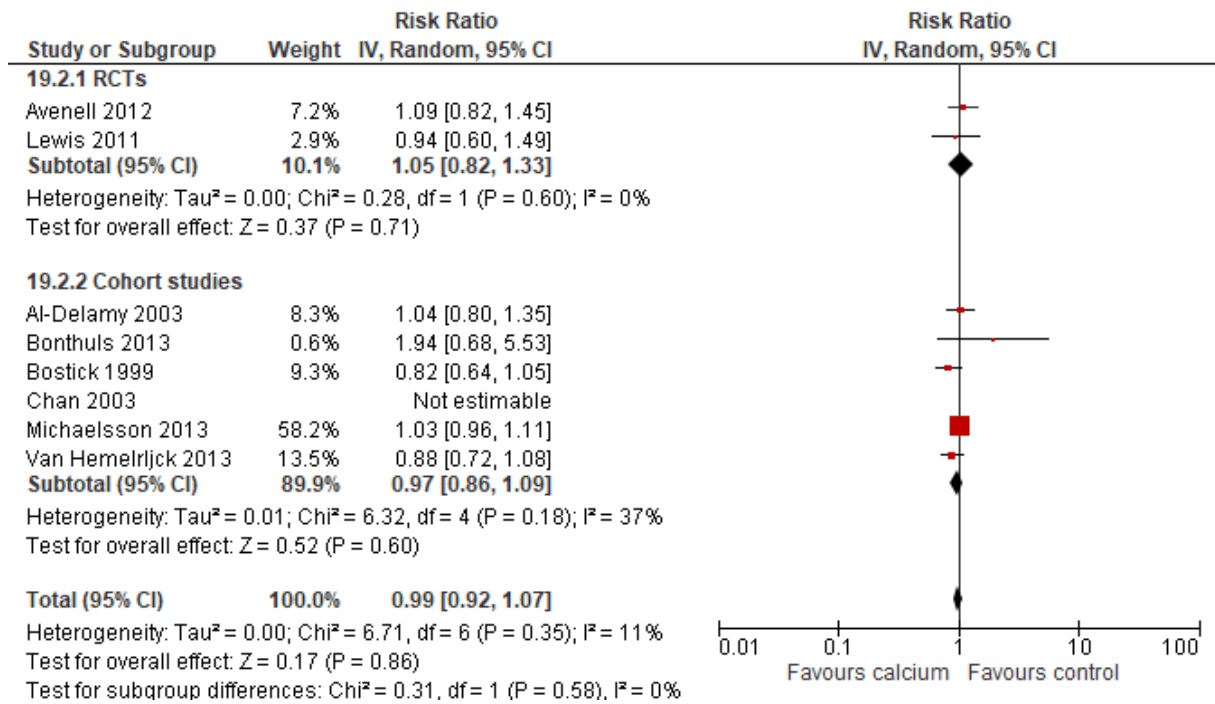

**Figure S28:** Chung 2016; Intervention/ Exposure: High calcium; Outcome: Cardiovascular mortality

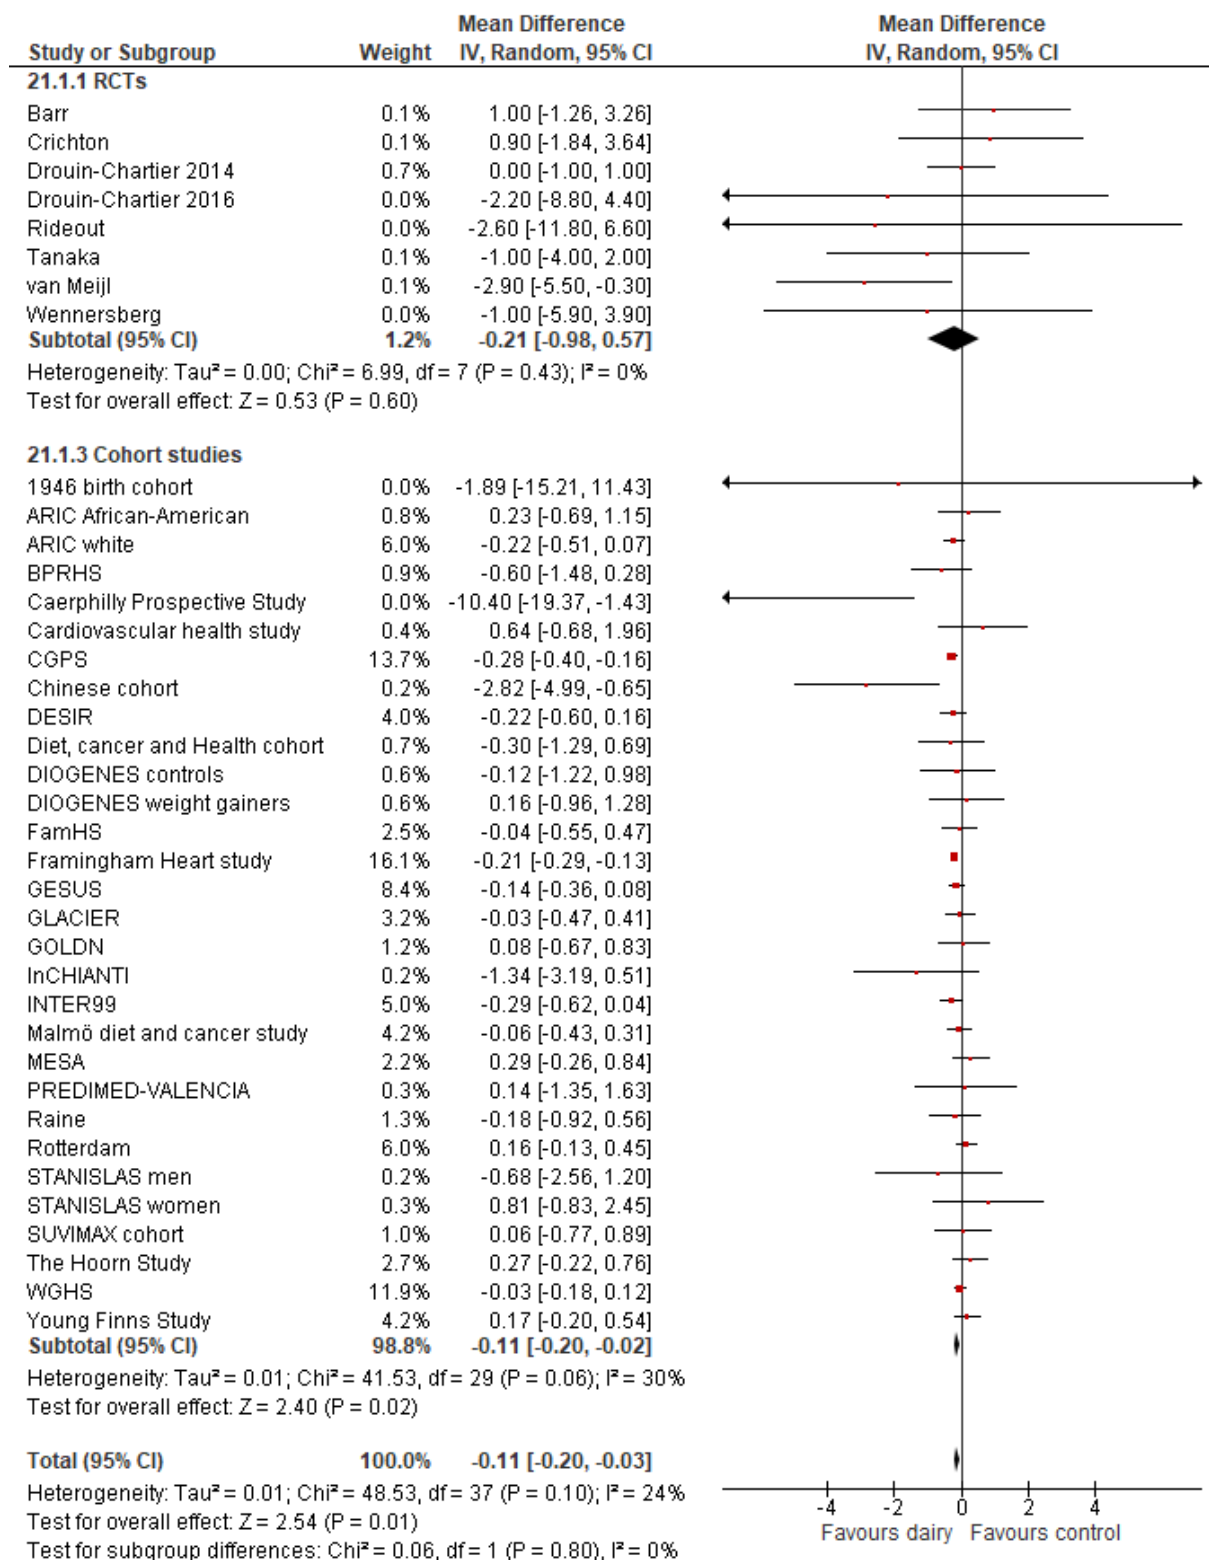

**Figure S29:** Ding 2017; Intervention/ Exposure: High dairy; Outcome: Systolic blood pressure

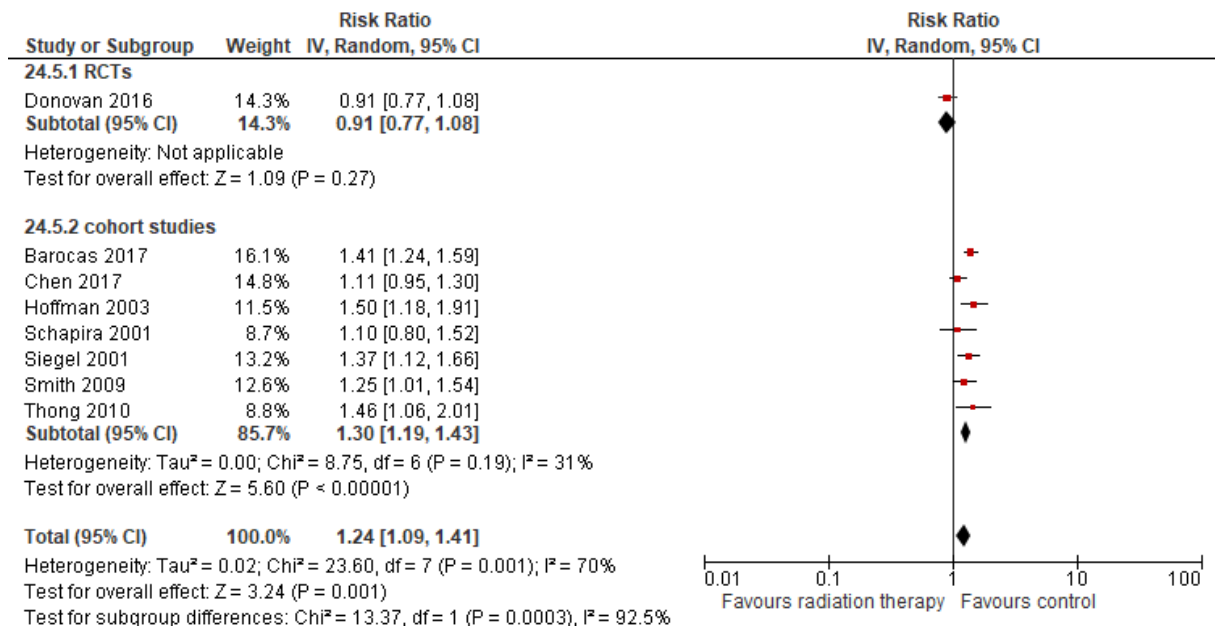

**Figure S30:** Fenton 2018; Intervention/ Exposure: Radiation therapy; Outcome: Erectile dysfunction

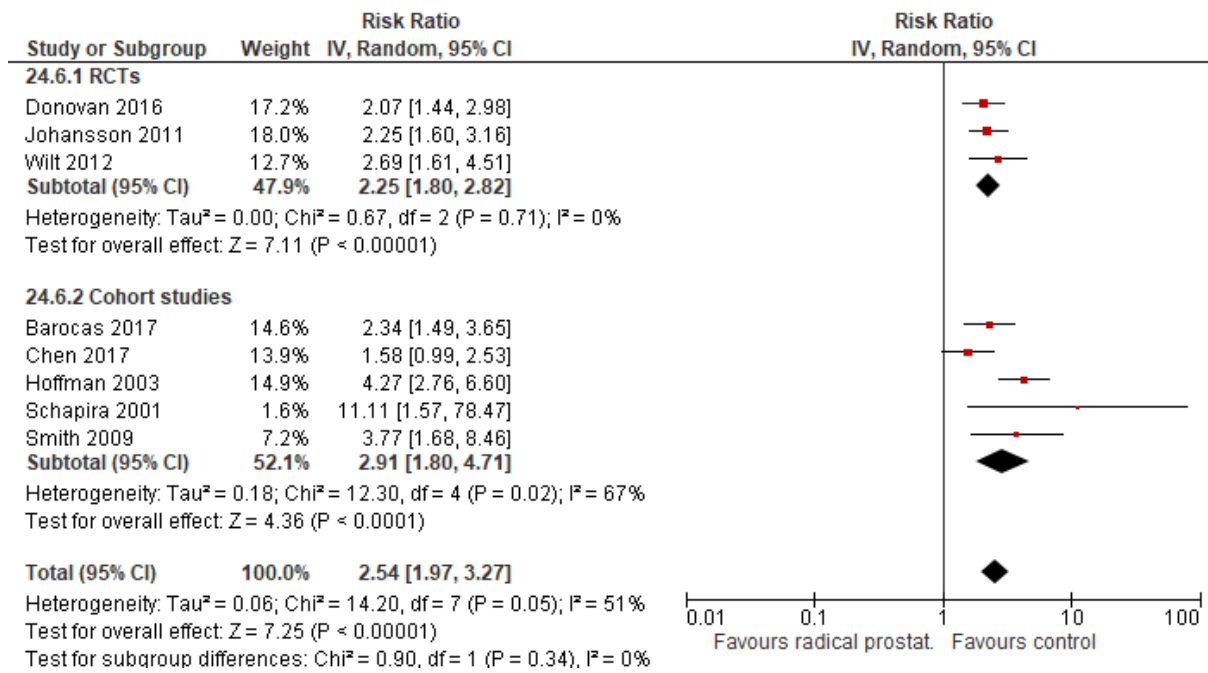

**Figure S31:** Fenton 2018; Intervention/ Exposure: Radical prostatectomy; Outcome: Urinary incontinence

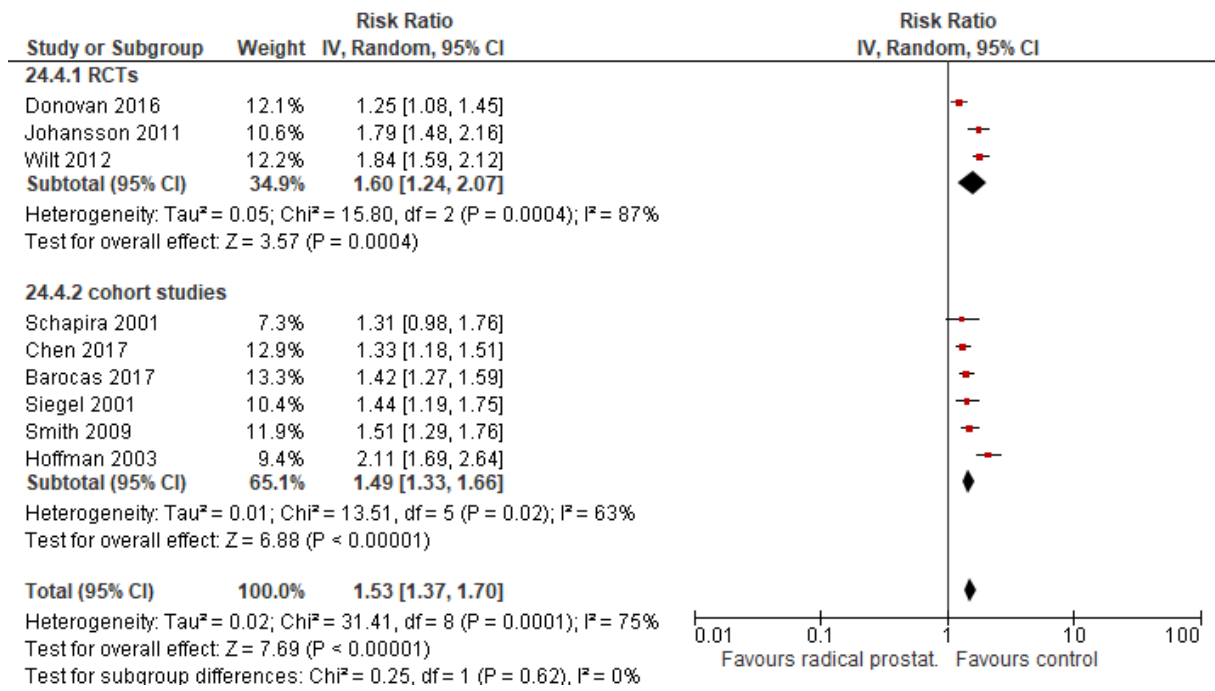

**Figure S32:** Fenton 2018; Intervention/ Exposure: Radical Prostatectomy; Outcome: Erectile dysfunction



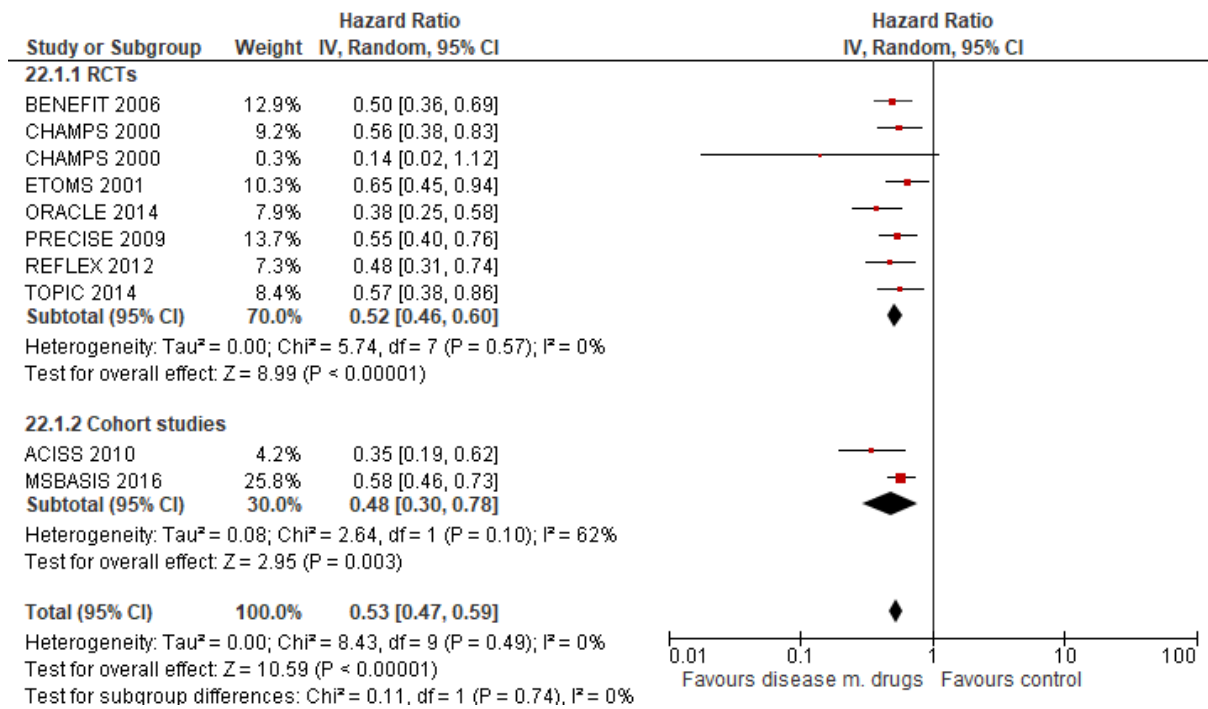

**Figure S33:** Filippini 2017; Intervention/ Exposure: Disease-modifying drugs; Outcome: Conversion to clinically definite multiple sclerosis

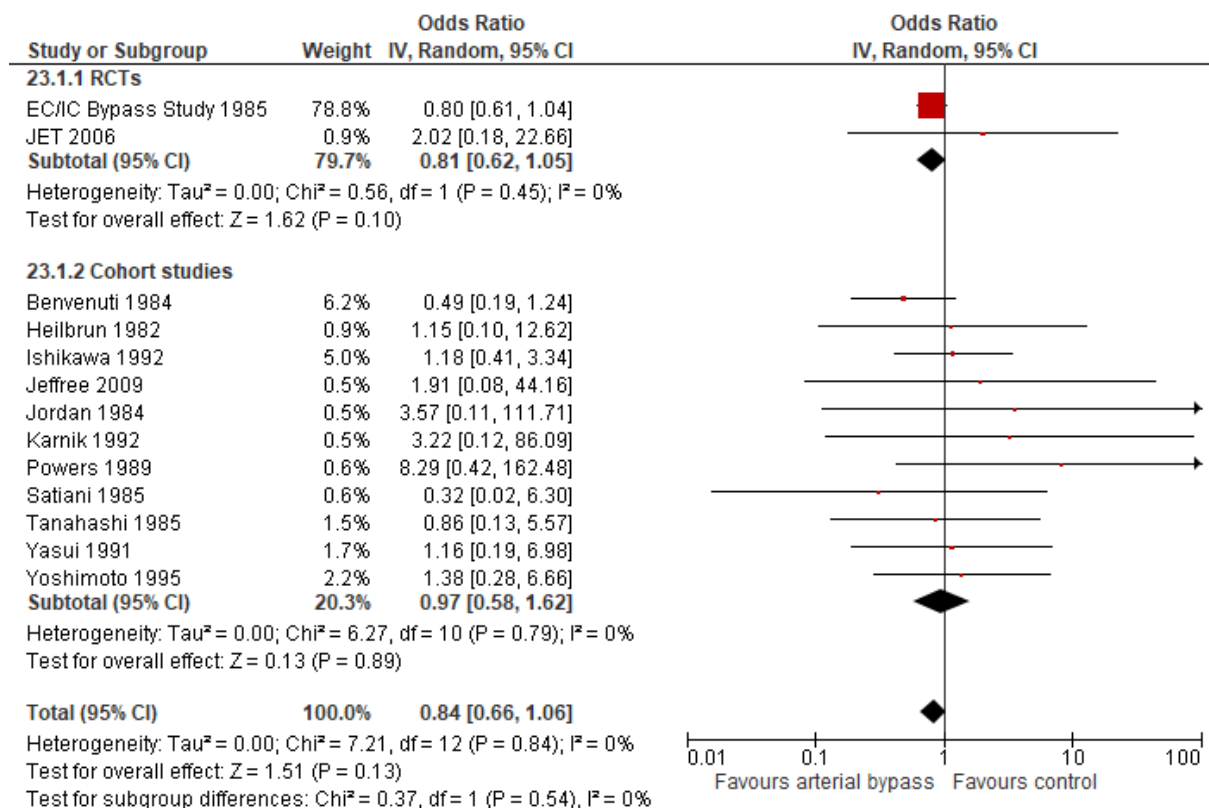

**Figure S34:** Fluri 2010; Intervention/ Exposure: Extracranial-intracranial arterial bypass; Outcome: All-cause mortality

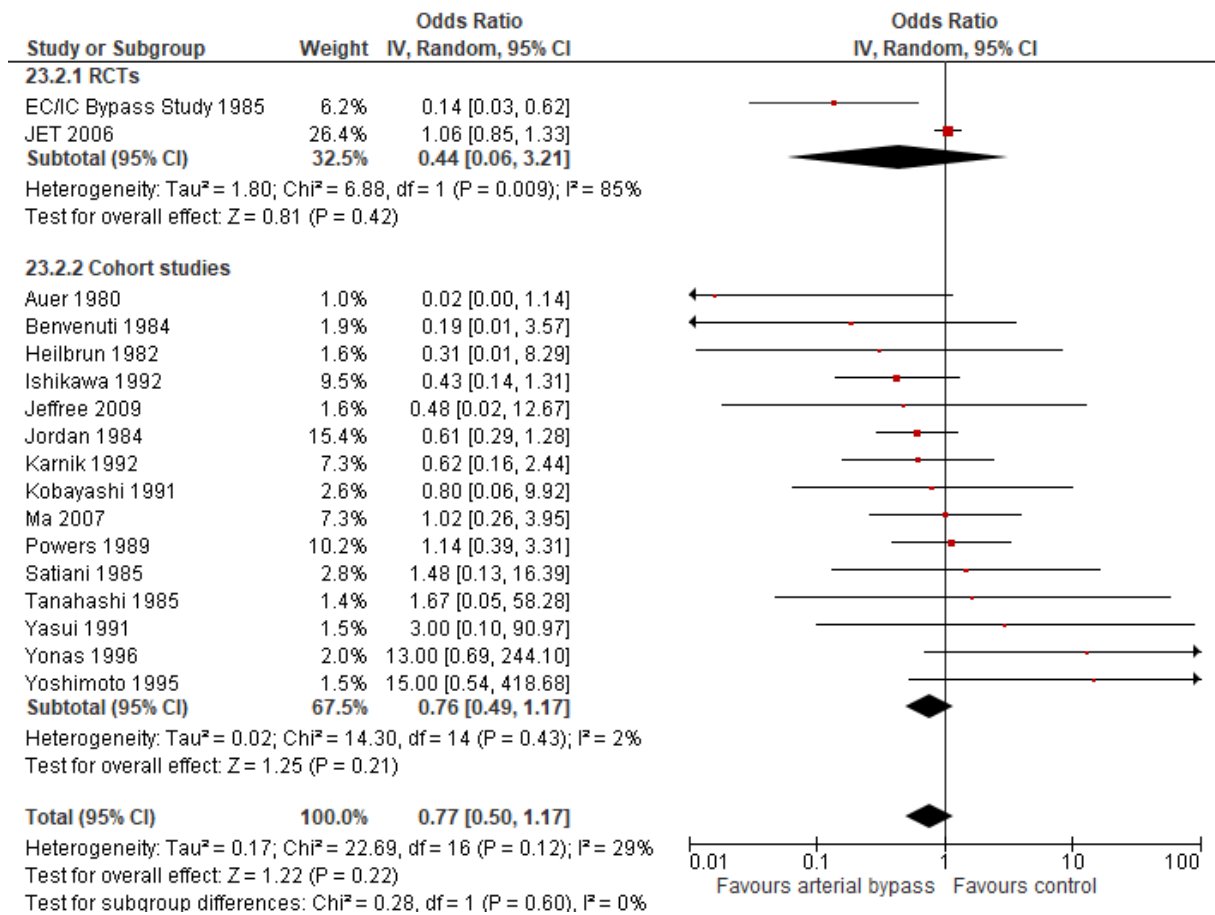

**Figure S35:** Fluri 2010; Intervention/ Exposure: Extracranial-intracranial arterial bypass; Outcome: Stroke

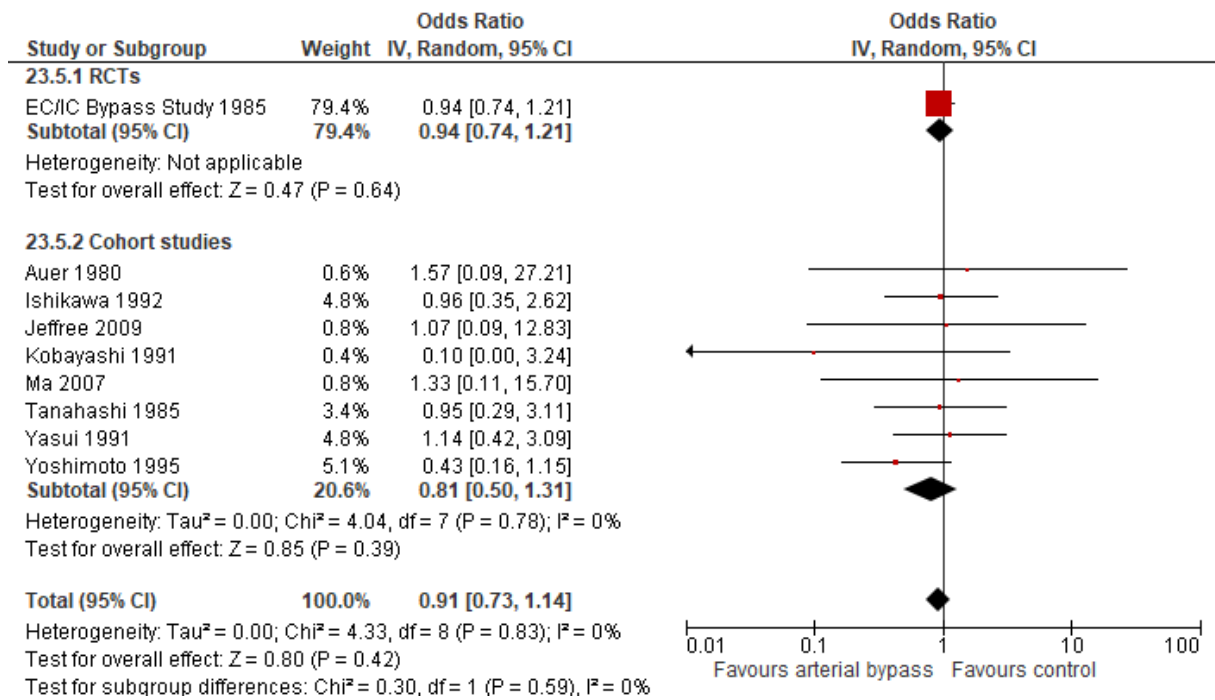

**Figure S36:** Fluri 2010; Intervention/ Exposure: Extracranial-intracranial arterial bypass; Outcome: Stroke mortality or dependency

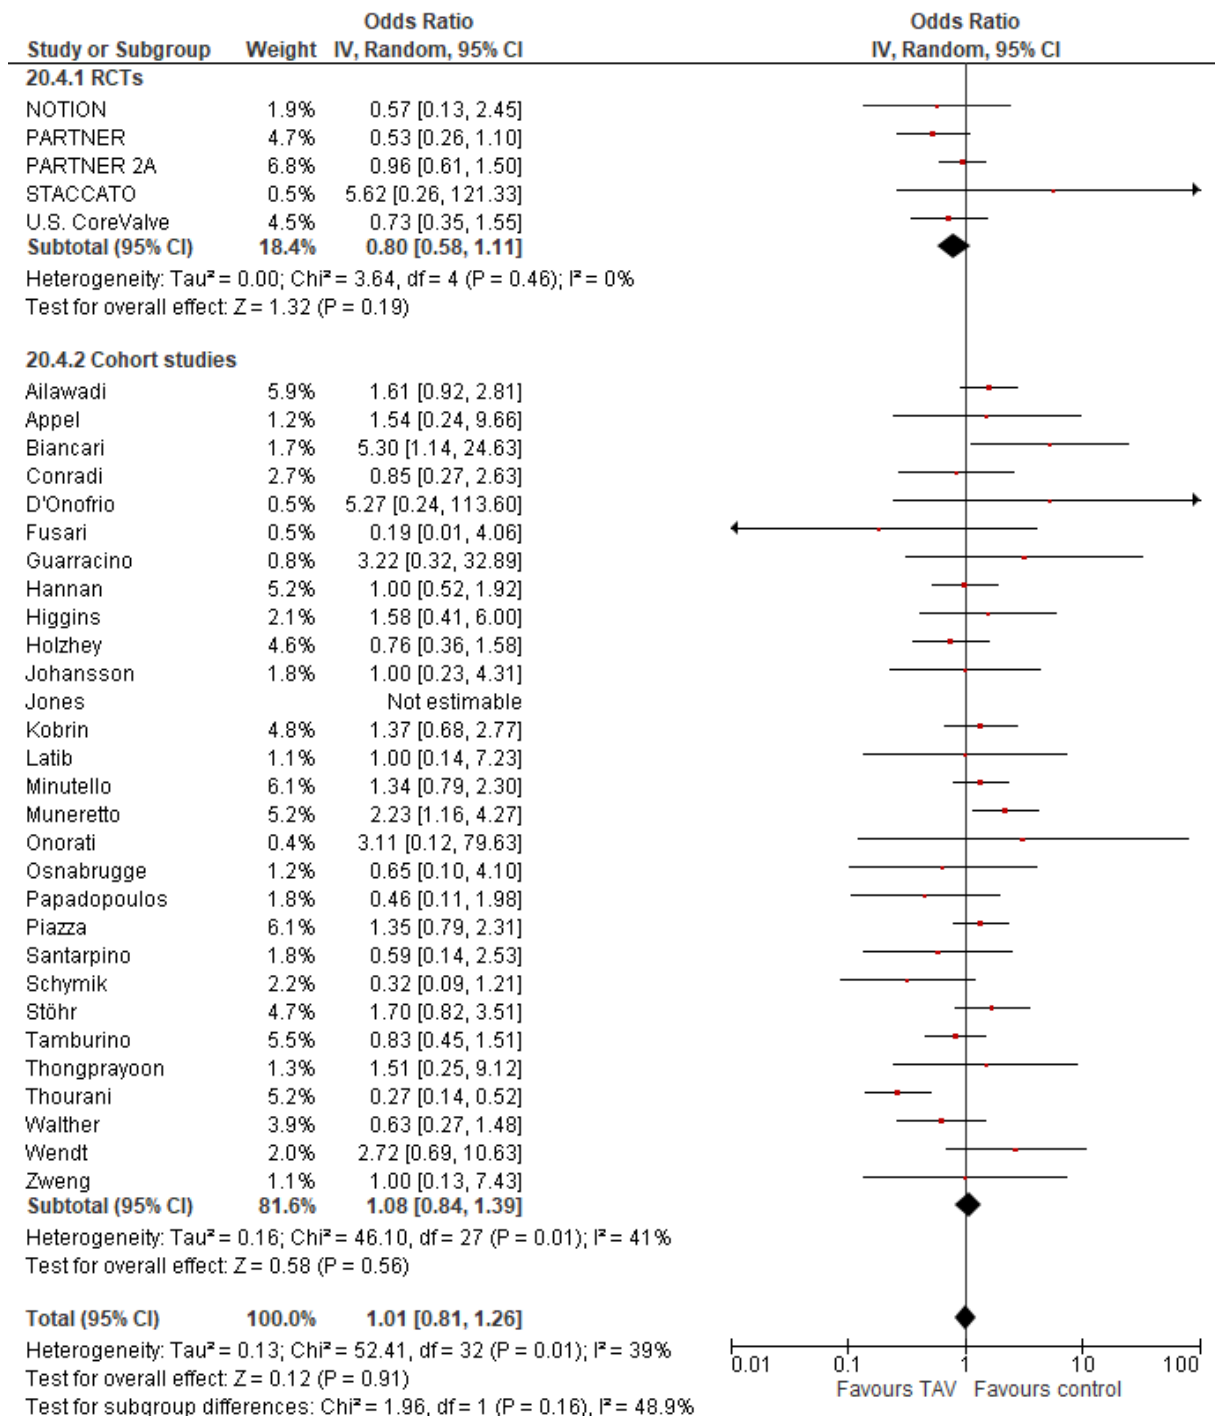

**Figure S37:** Gargiulo 2016; Intervention/ Exposure: Transcatheter aortic valve implantation; Outcome: Early all-cause mortality

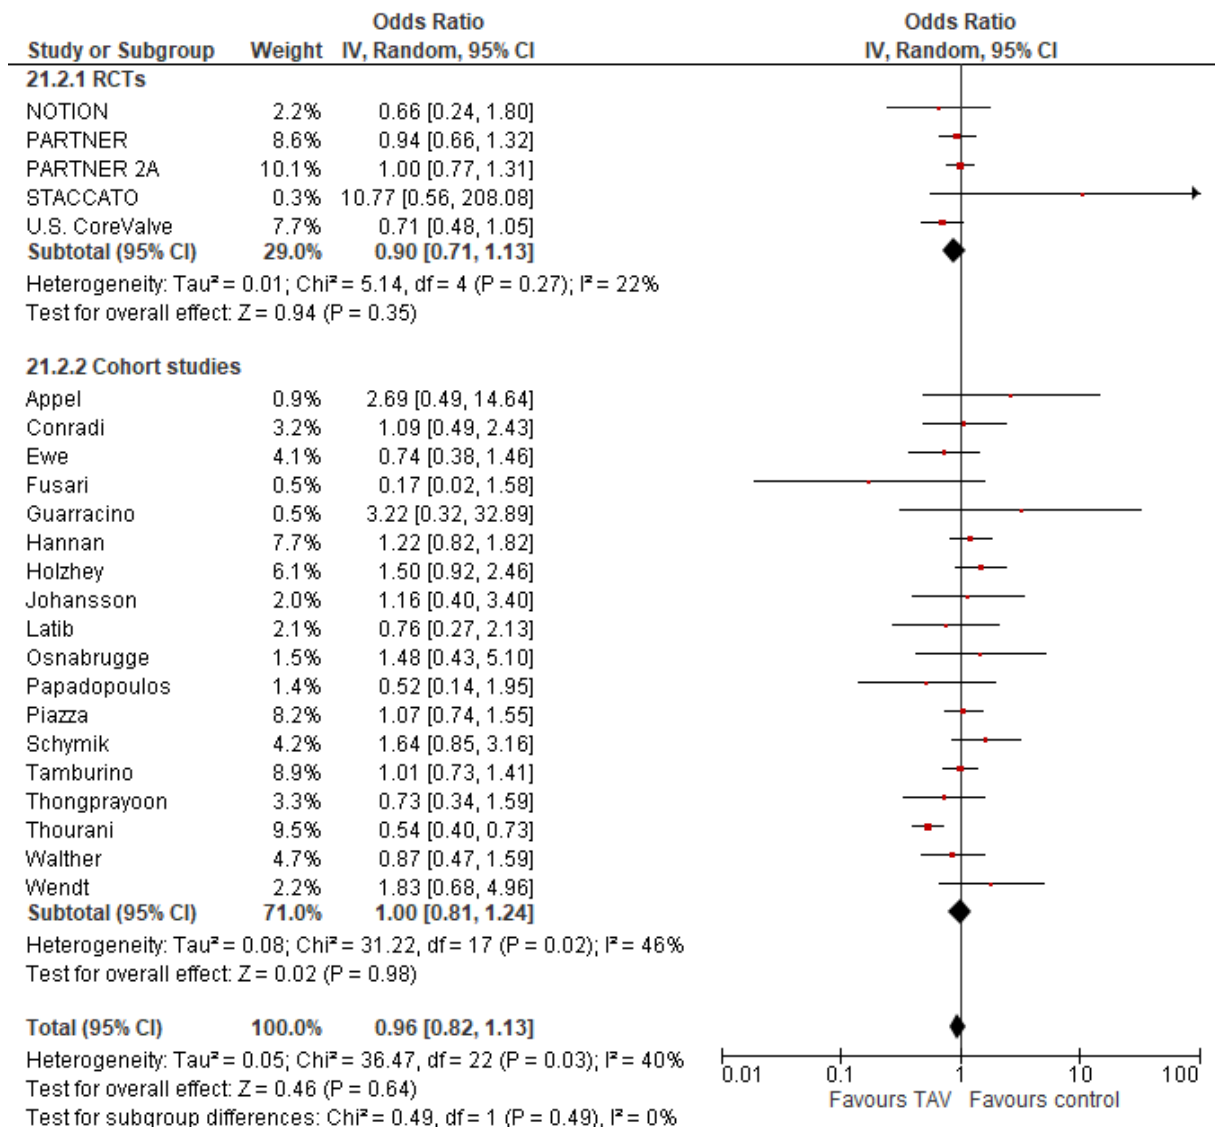

**Figure S38:** Gargiulo 2016; Intervention/ Exposure: Transcatheter aortic valve implantation; Outcome: Mid-term all-cause mortality

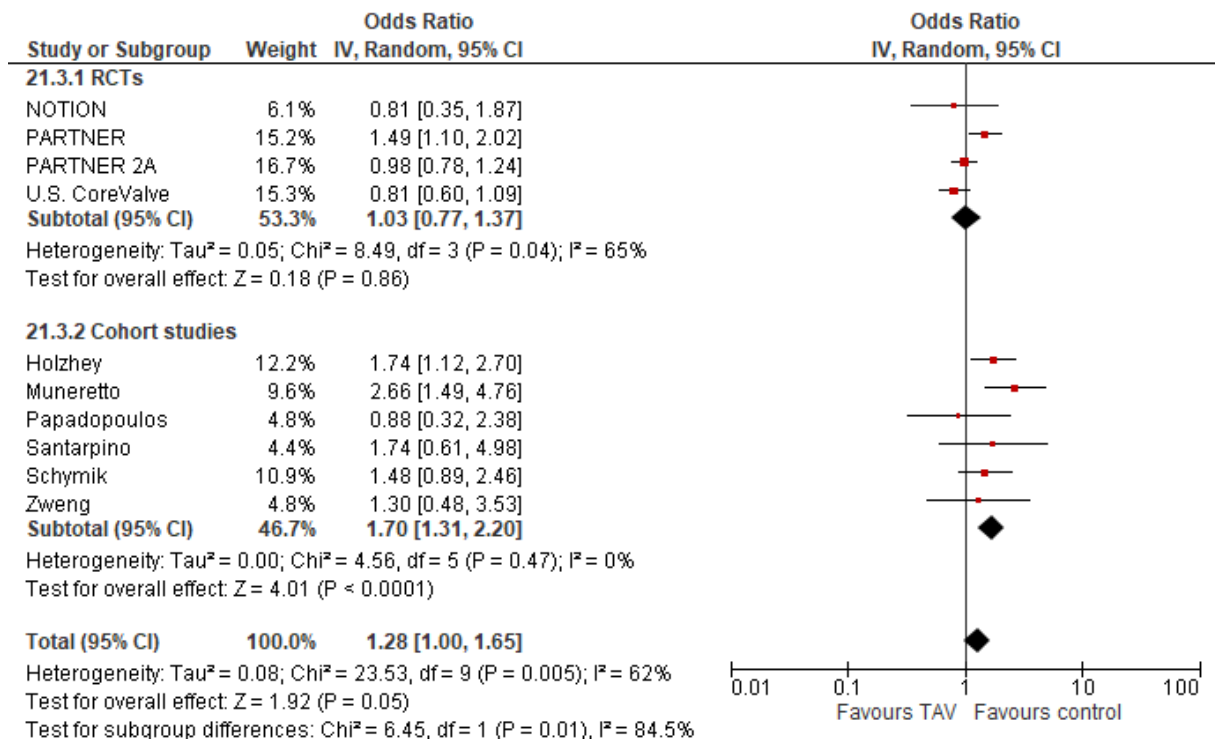

**Figure S39:** Gargiulo 2016; Intervention/ Exposure: Transcatheter aortic valve implantation; Outcome: Long-term all-cause mortality

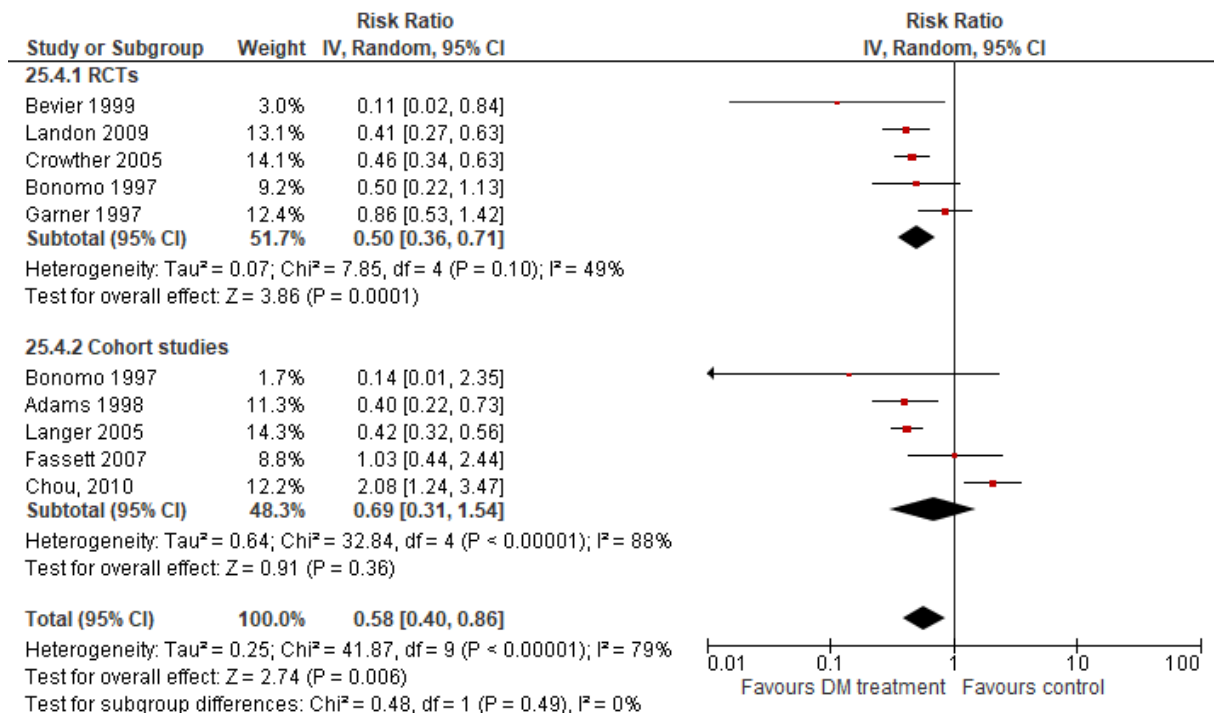

**Figure S40:** Hartling 2013; Intervention/ Exposure: Treating gestational diabetes mellitus; Outcome: High birth weight



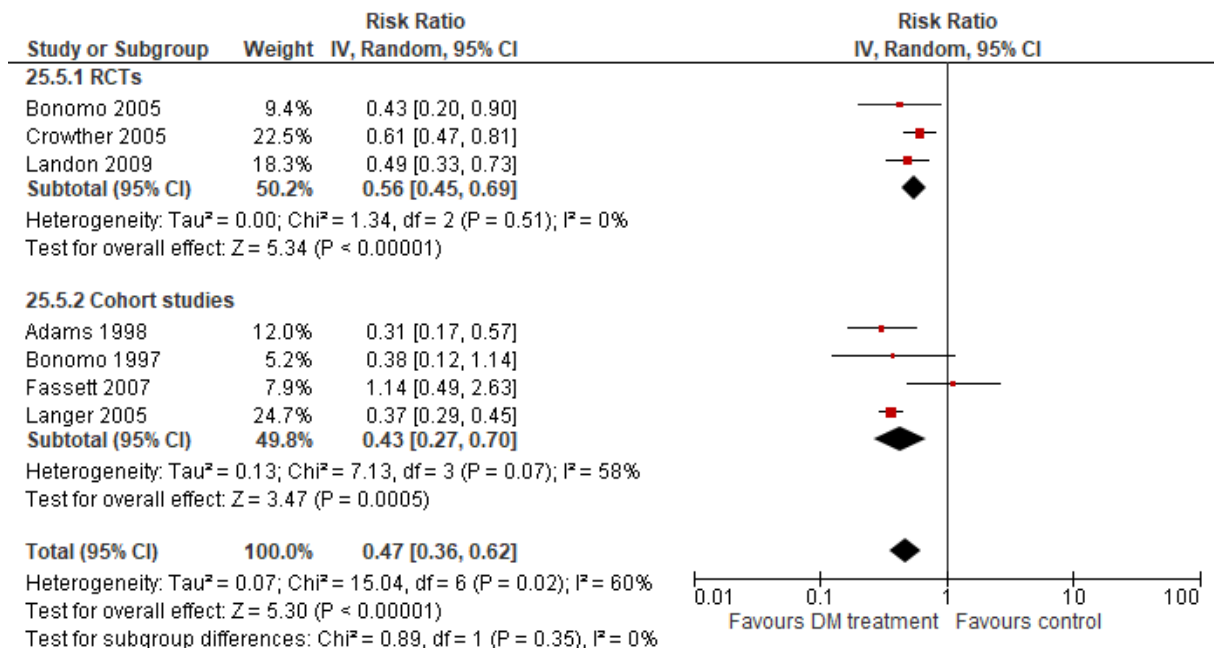

**Figure S41:** Hartling 2013; Intervention/ Exposure: Treating gestational diabetes mellitus; Outcome: Large-for-gestational age neonate

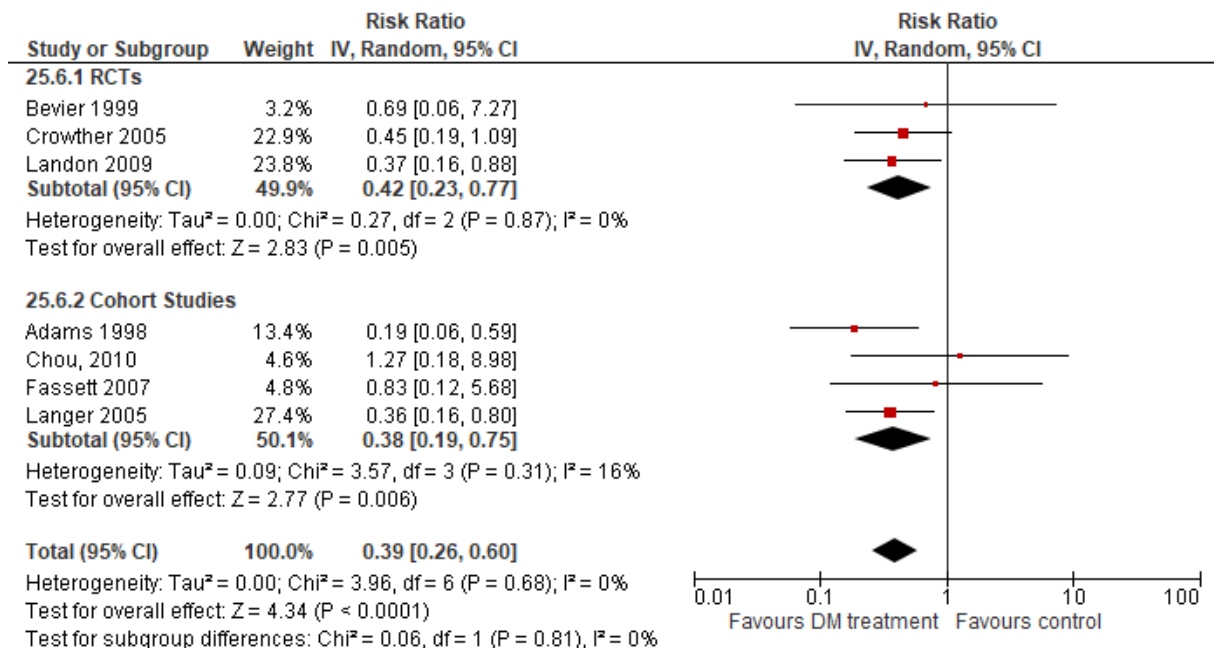

**Figure S42:** Hartling 2013; Intervention/ Exposure: Treating gestational diabetes mellitus; Outcome: Shoulder dystocia

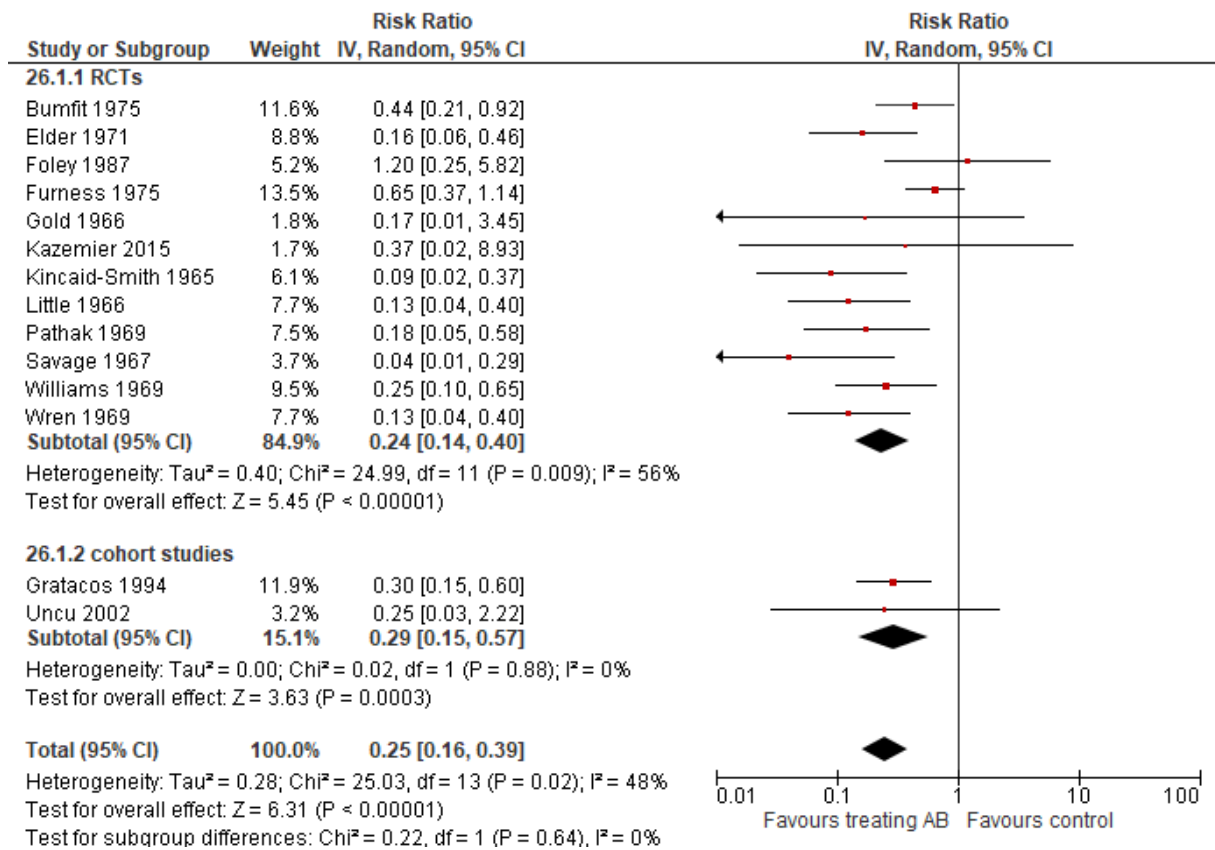

**Figure S43:** Henderson 2019; Intervention/ Exposure: Treating asymptomatic bacteriuria; Outcome: Pyelonephritis

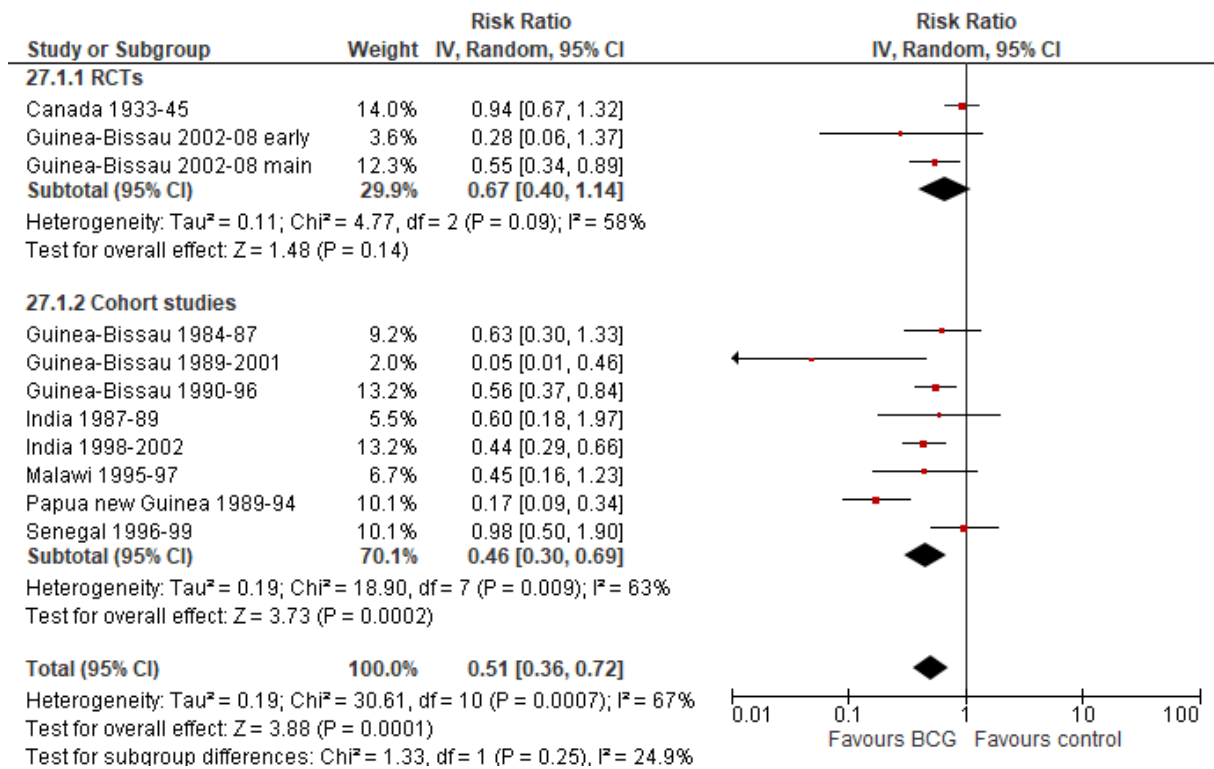

**Figure S44:** Higgins 2016; Intervention/ Exposure: Bacillus Calmette-Guérin vaccination; Outcome: All-cause mortality

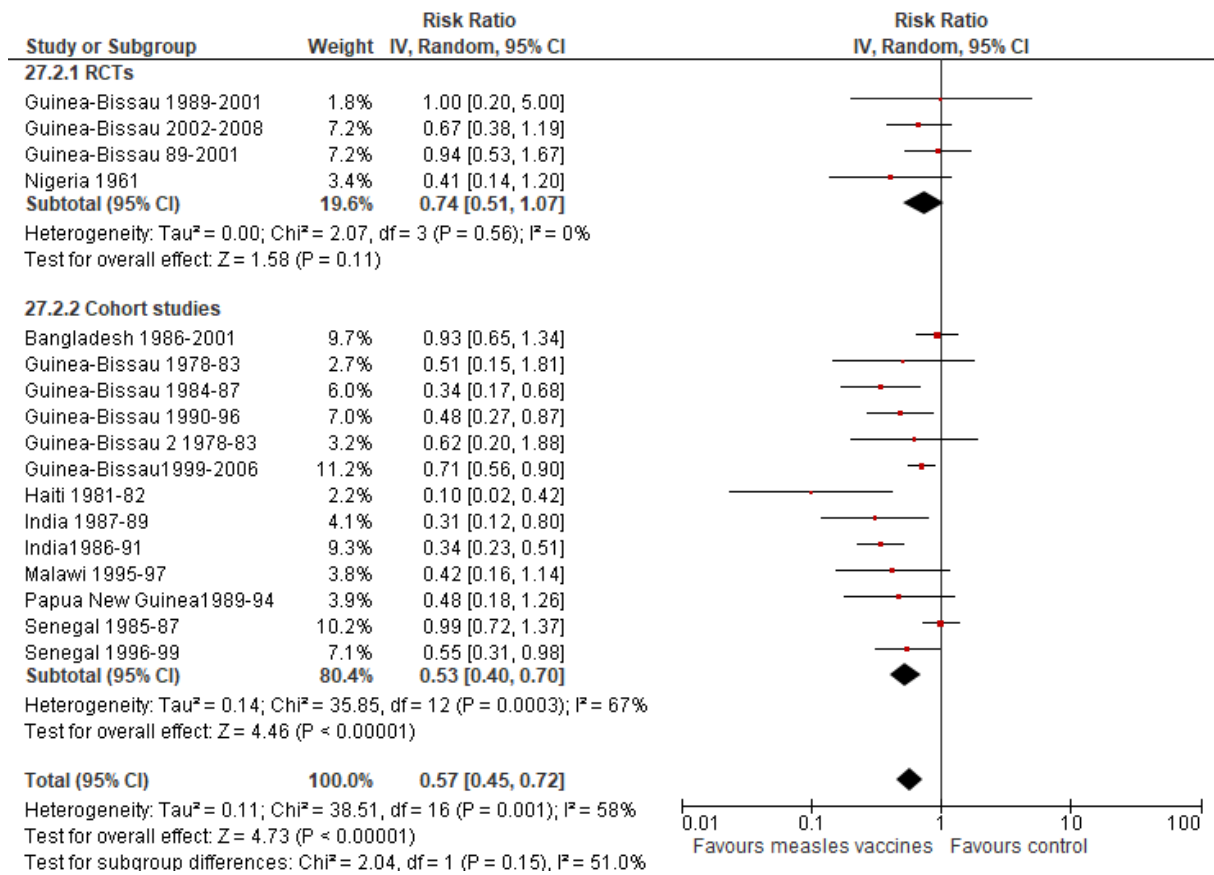

**Figure S45:** Higgins 2016; Intervention/ Exposure: Measles containing vaccines; Outcome: All-cause mortality

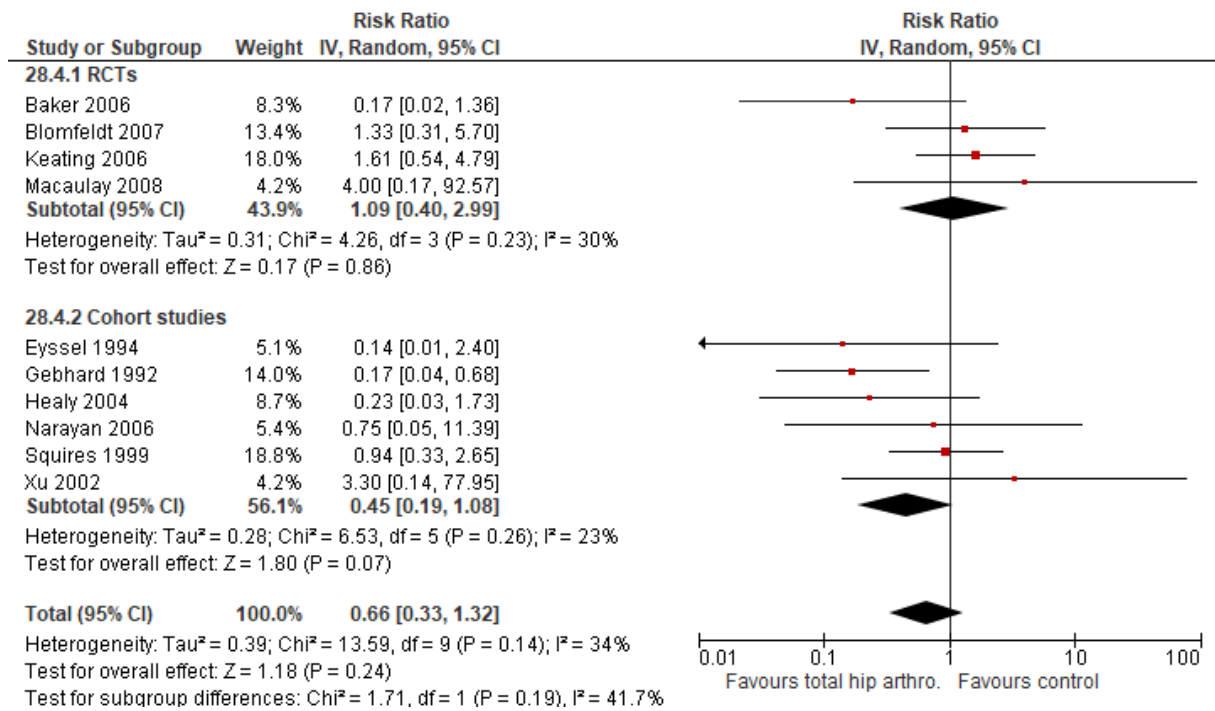

**Figure S46:** Hopley 2010; Intervention/ Exposure: Total hip arthroplasty; Outcome: Reoperation

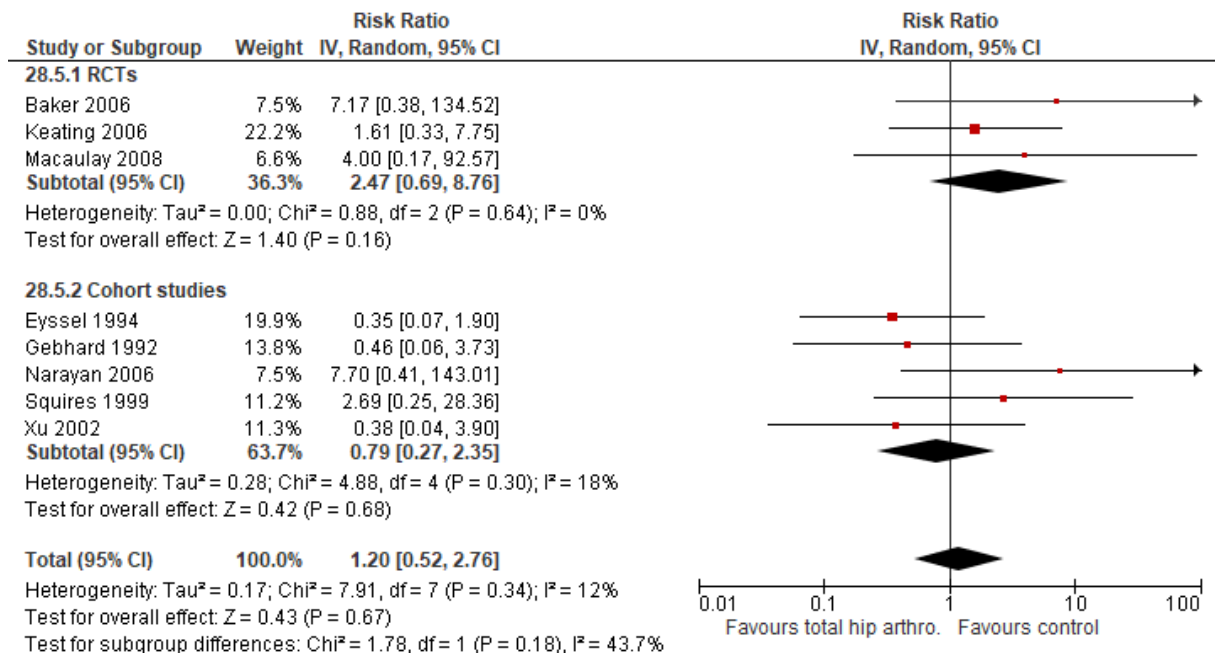

**Figure S47:** Hopley 2010; Intervention/ Exposure: Total hip arthroplasty; Outcome: Dislocation

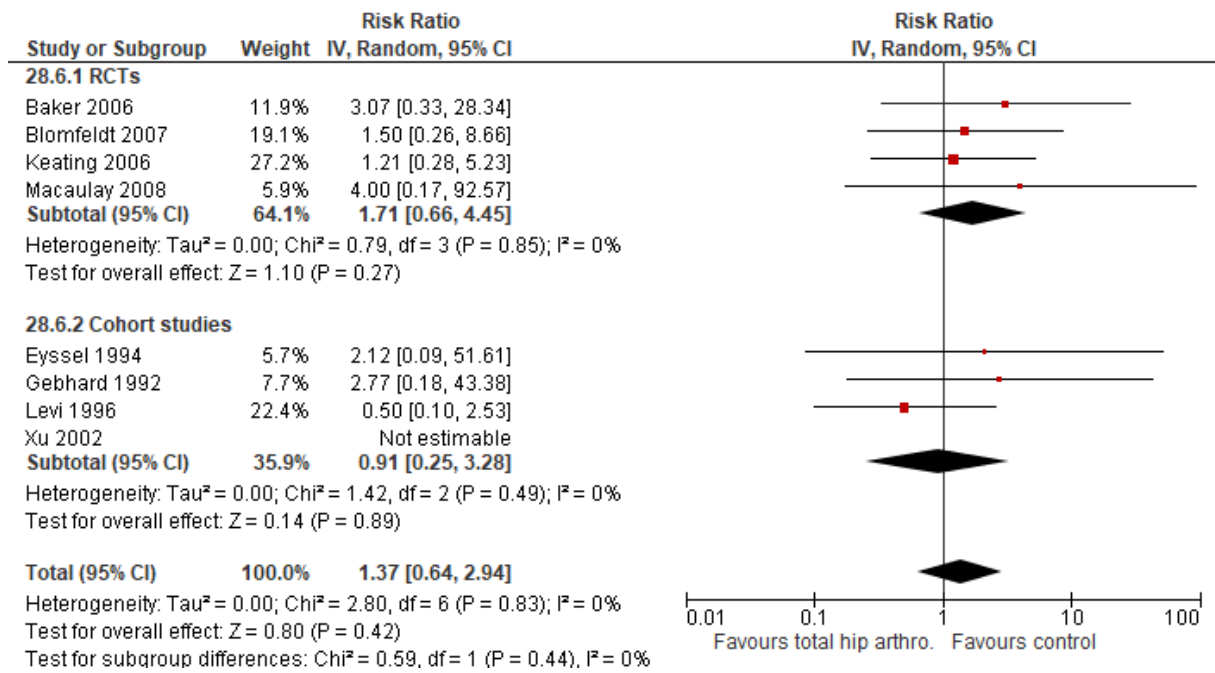

**Figure S48:** Hopley 2010; Intervention/ Exposure: Total hip arthroplasty; Outcome: Deep infection



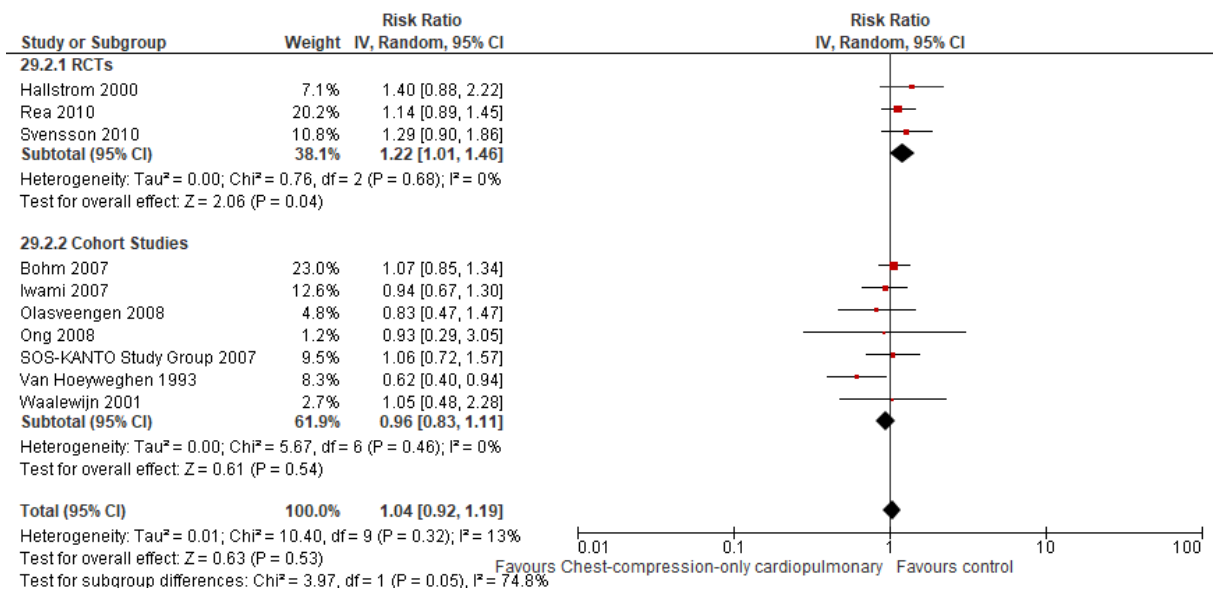

**Figure S49:** Hüpfl 2010; Intervention/ Exposure: Chest-compression-only cardiopulmonary resuscitation; Outcome: Survival (Risk Ratio >1 indicates a favorable effect)

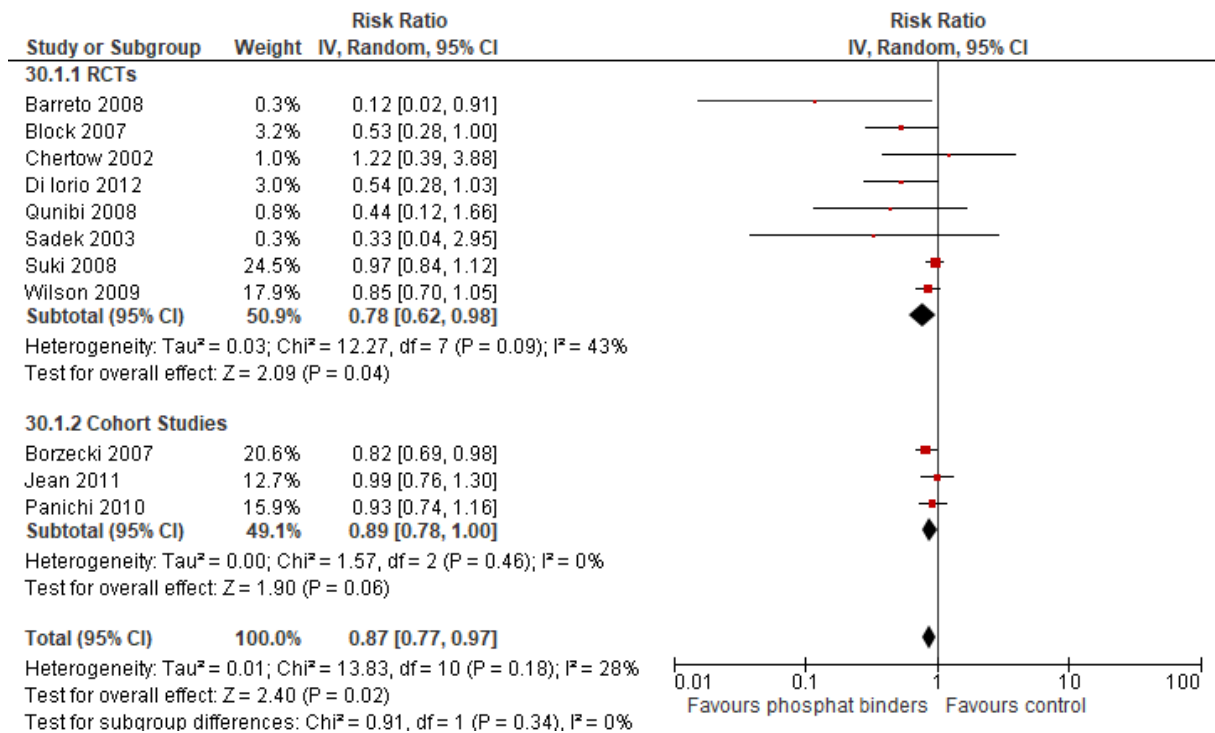

**Figure S50:** Jamal 2013; Intervention/ Exposure: Non-calcium-based phosphat binders; Outcome: All-cause mortality

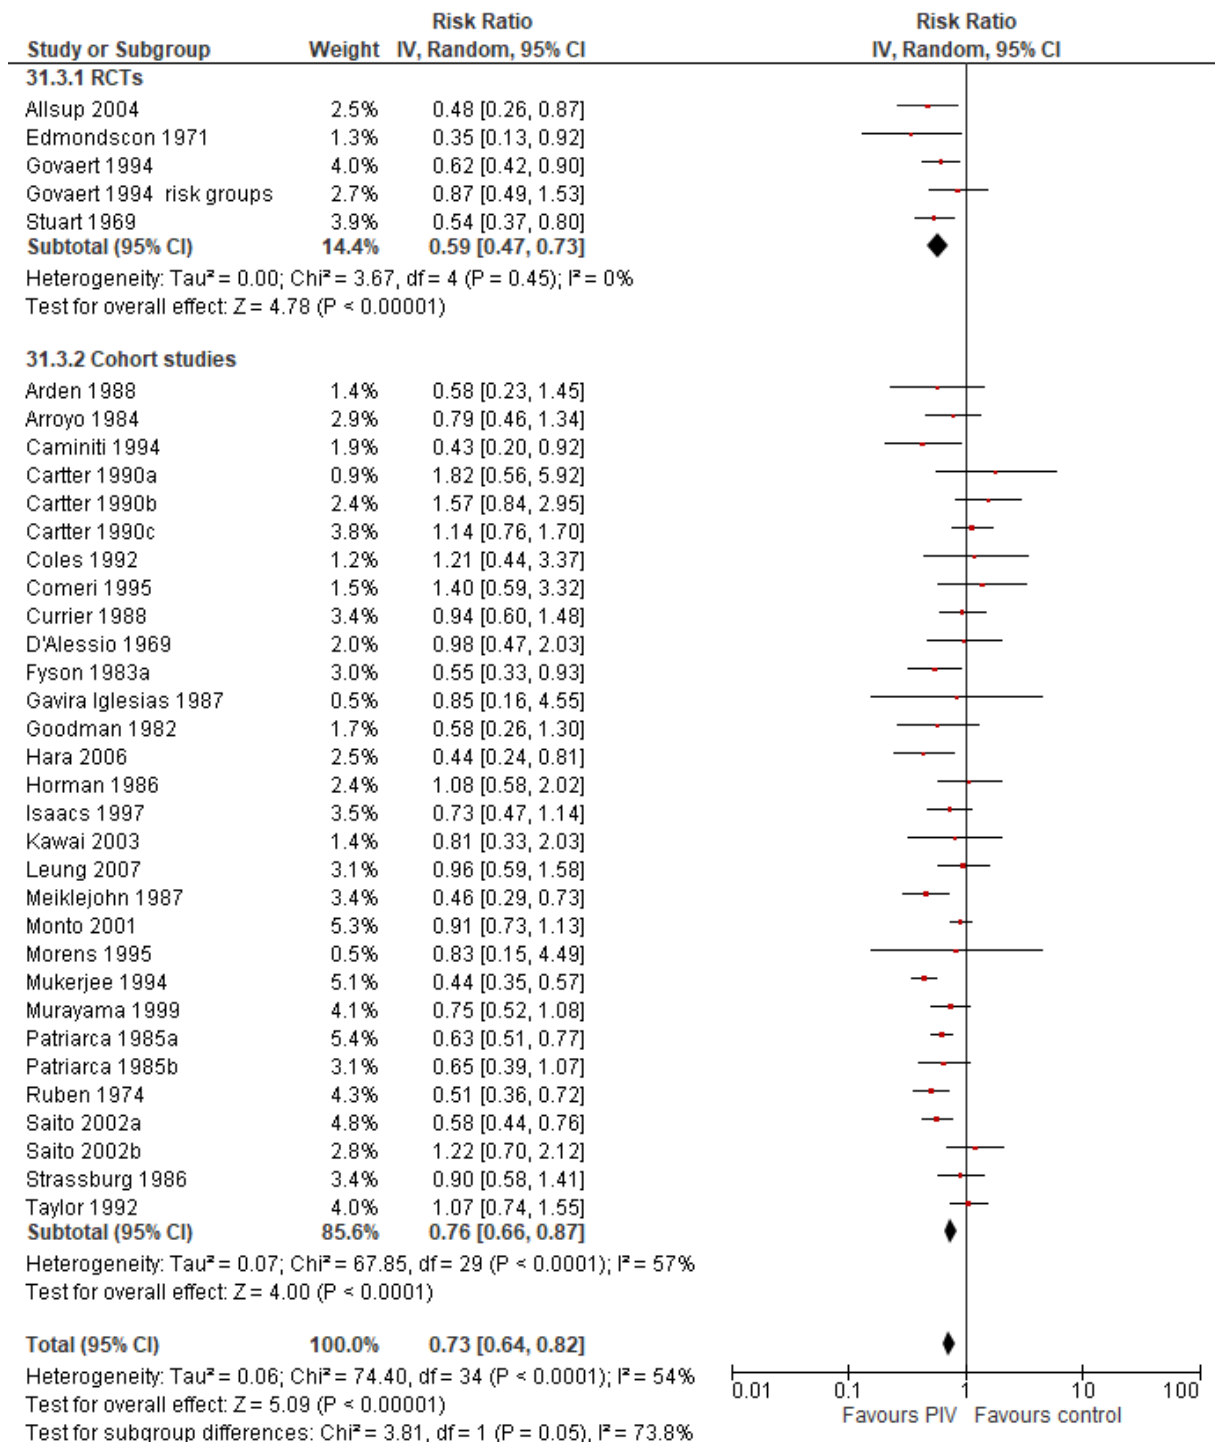

**Figure S51:** Jefferson 2010; Intervention/ Exposure: Parenteral influenza vaccine; Outcome: Influenza-like illness

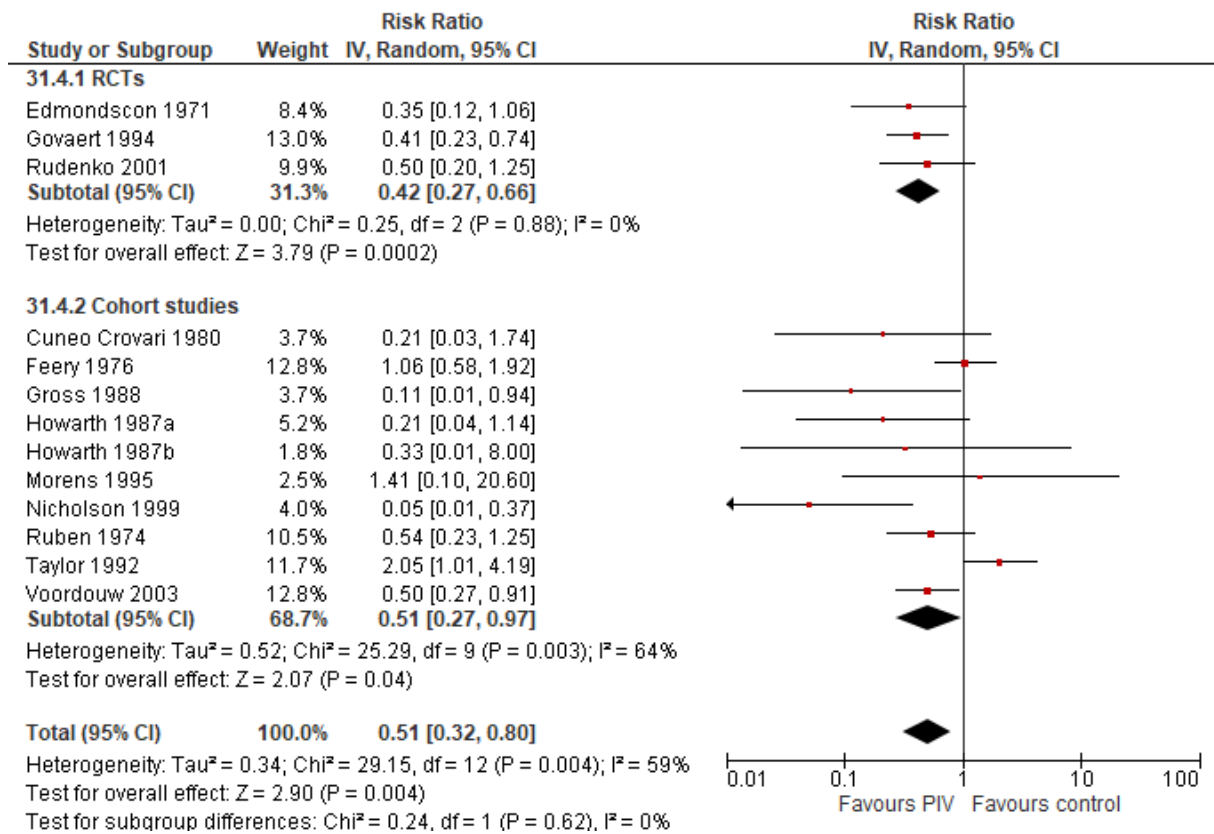

**Figure S52:** Jefferson 2010; Intervention/ Exposure: Parenteral influenza vaccine; Outcome: Influenza

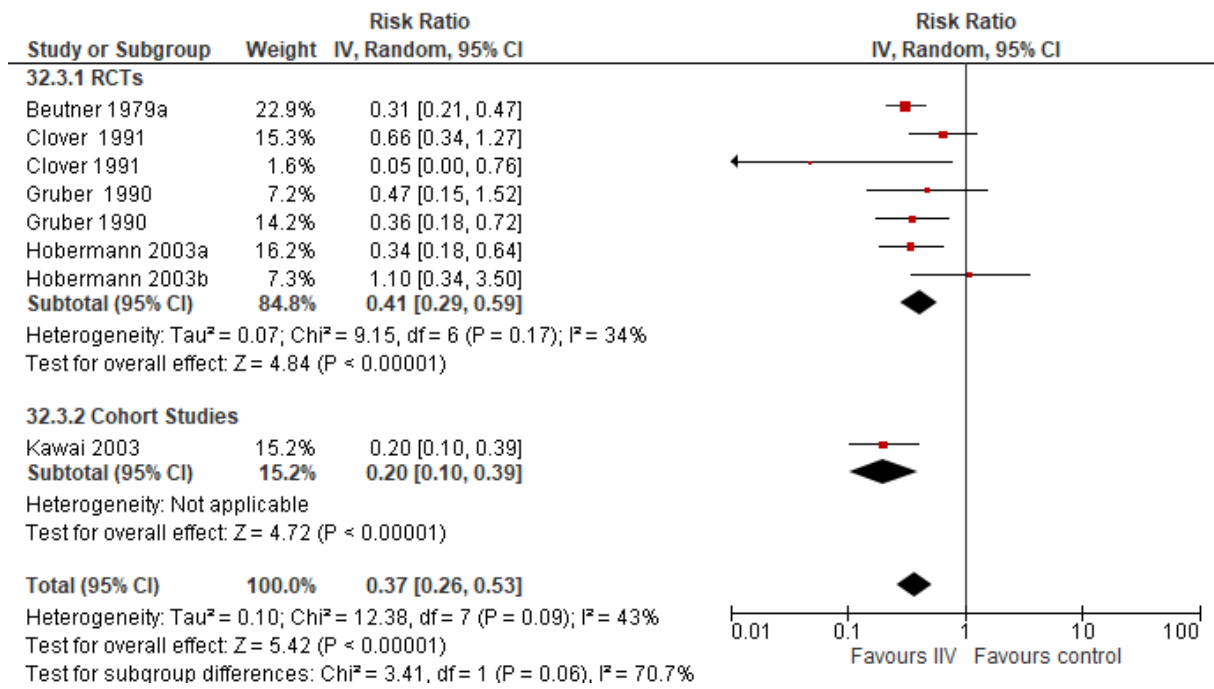

**Figure S53:** Jefferson 2012; Intervention/ Exposure: Inactivated influenza vaccines; Outcome: Influenza

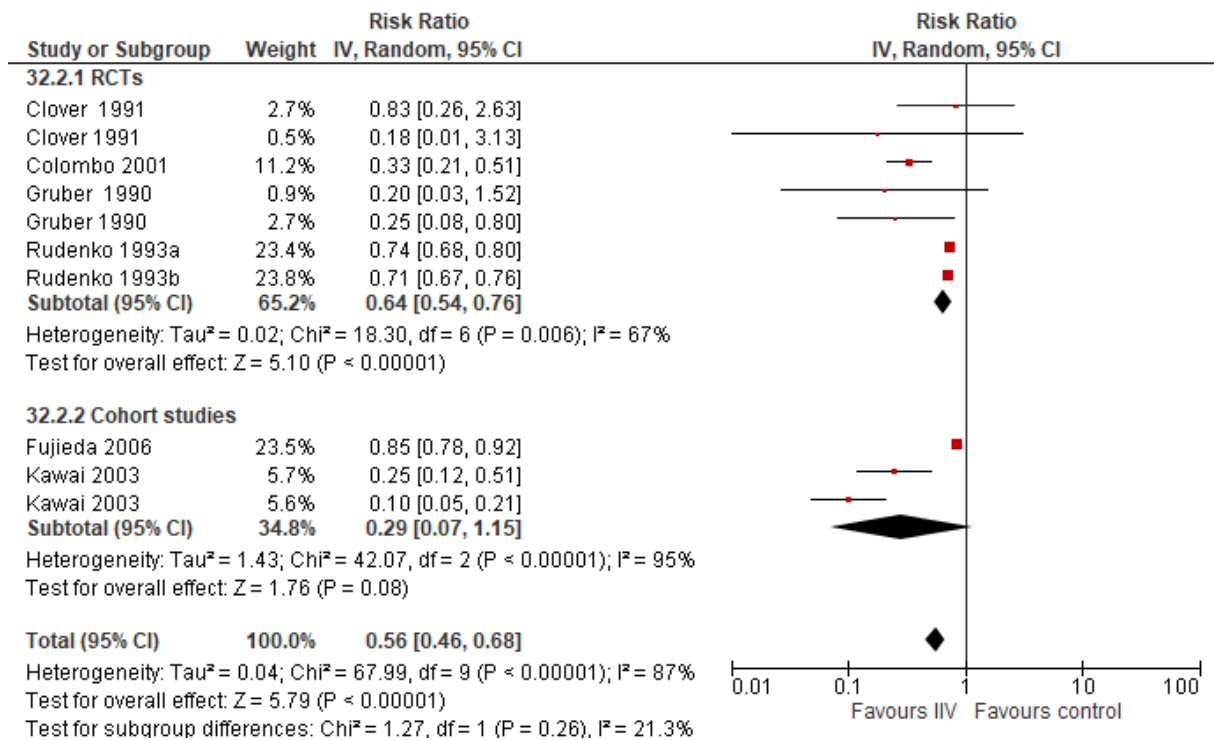

**Figure S54:** Jefferson 2012; Intervention/ Exposure: Inactivated influenza vaccines; Outcome: Influenza-like illness

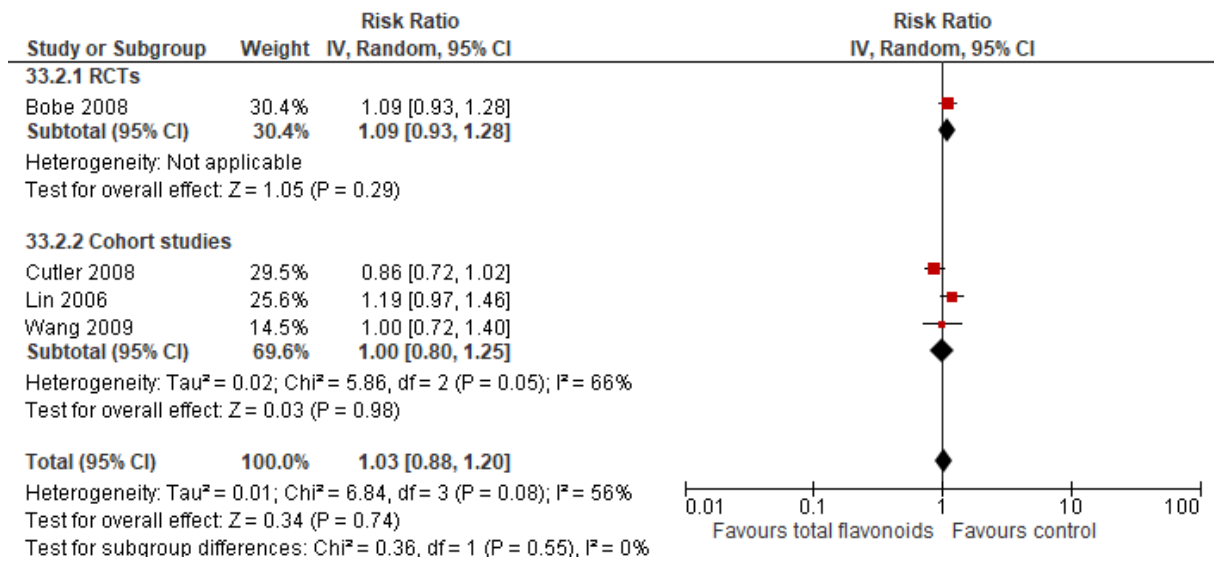

**Figure S55:** Jin 2012; Intervention/ Exposure: High total flavonoids; Outcome: Colorectal neoplasms

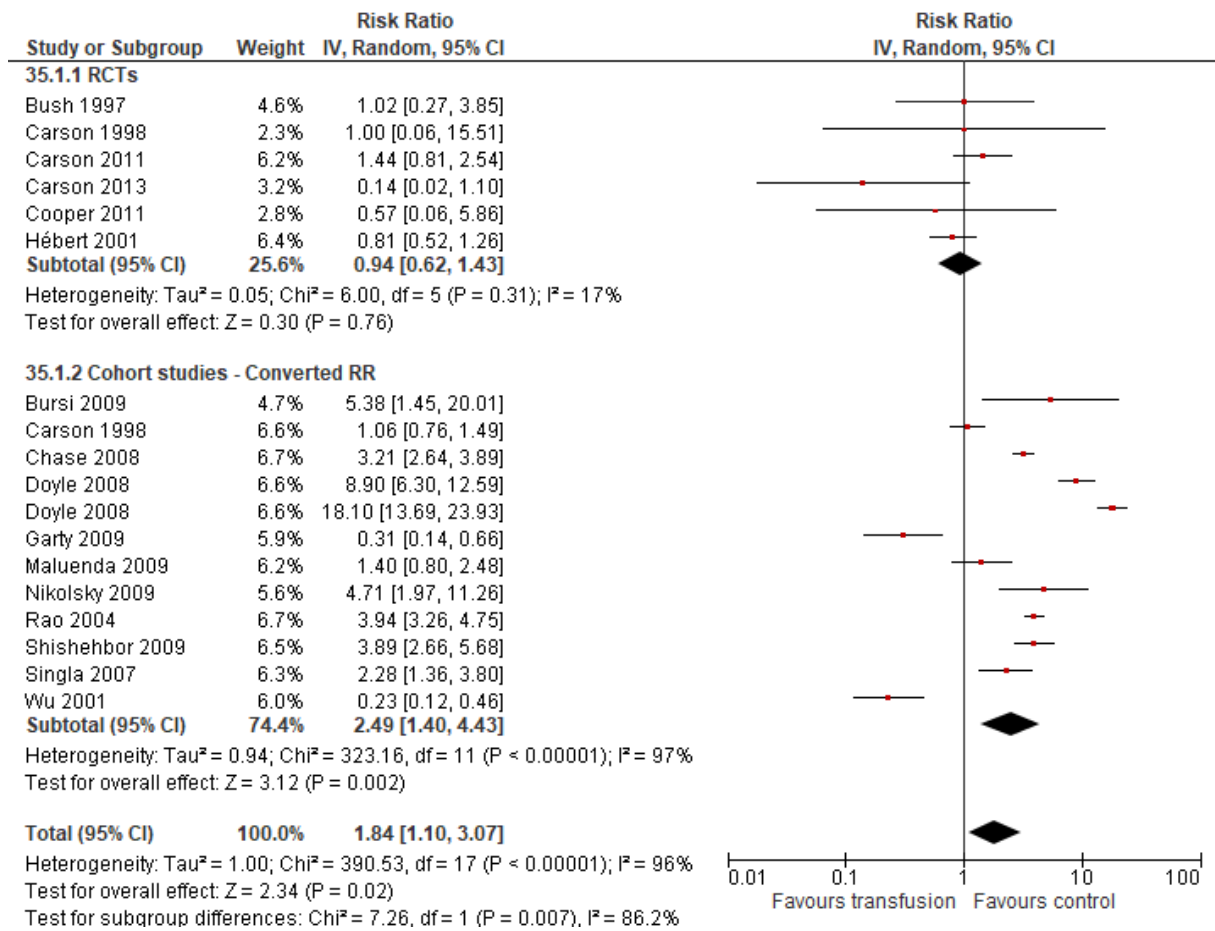

**Figure S56:** Kansagara 2013; Intervention/ Exposure: Transfusion; Outcome: All-cause mortality



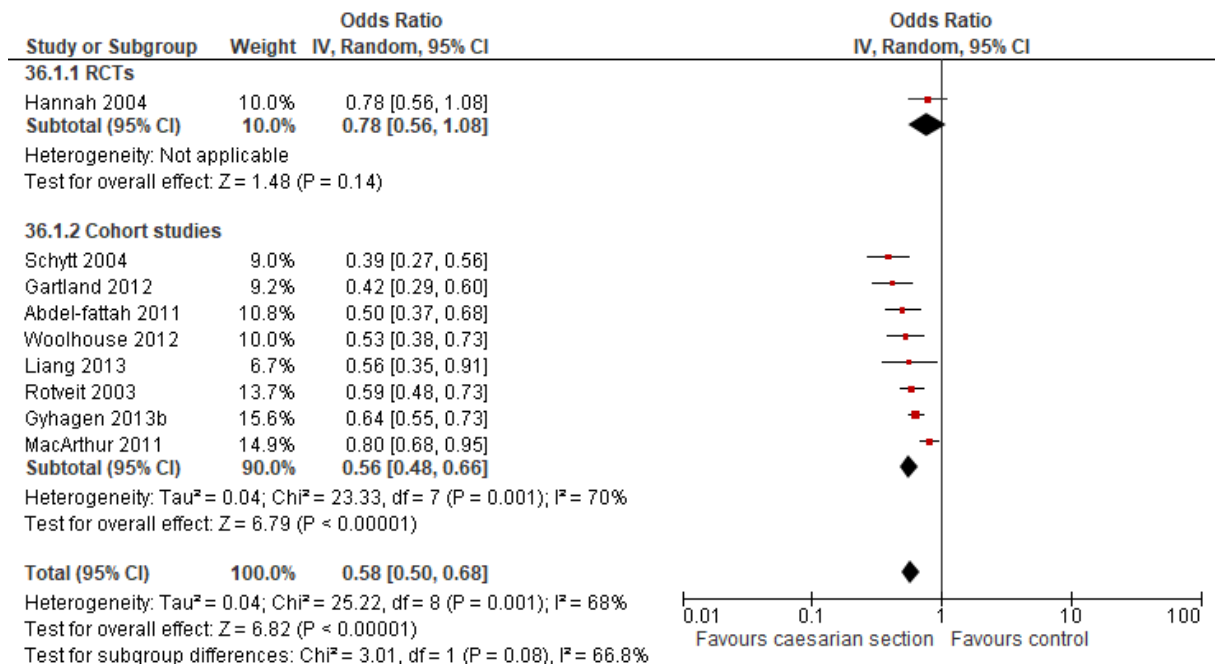

**Figure S57:** Keag 2018; Intervention/ Exposure: Caesarean section; Outcome: Urinary incontinence

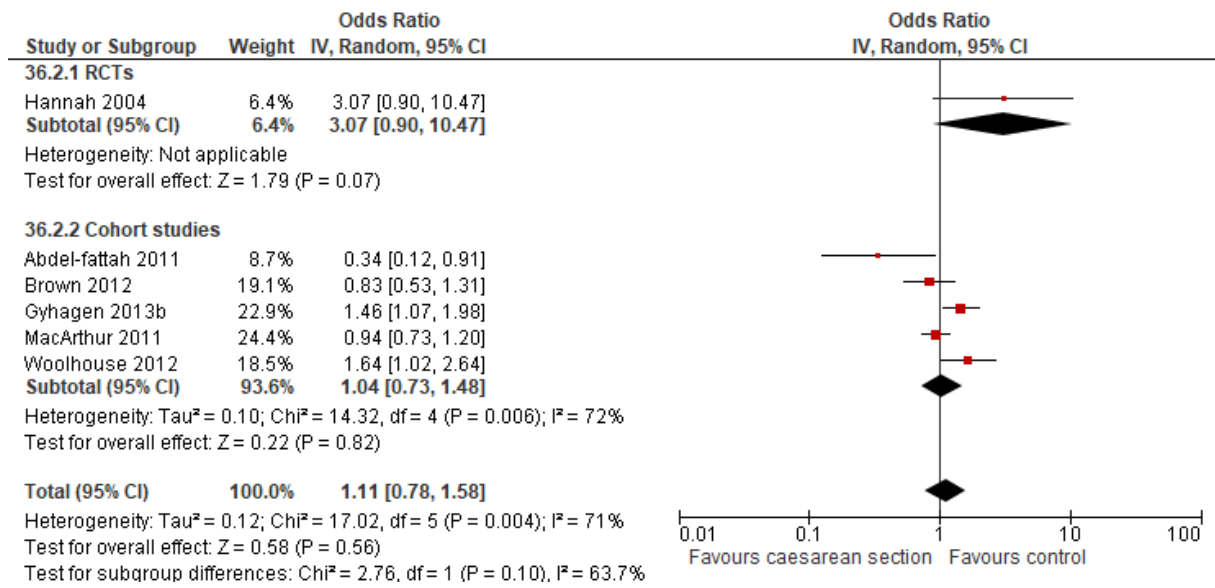

**Figure S58:** Keag 2018; Intervention/ Exposure: Caesarean section; Outcome: Fecal incontinence

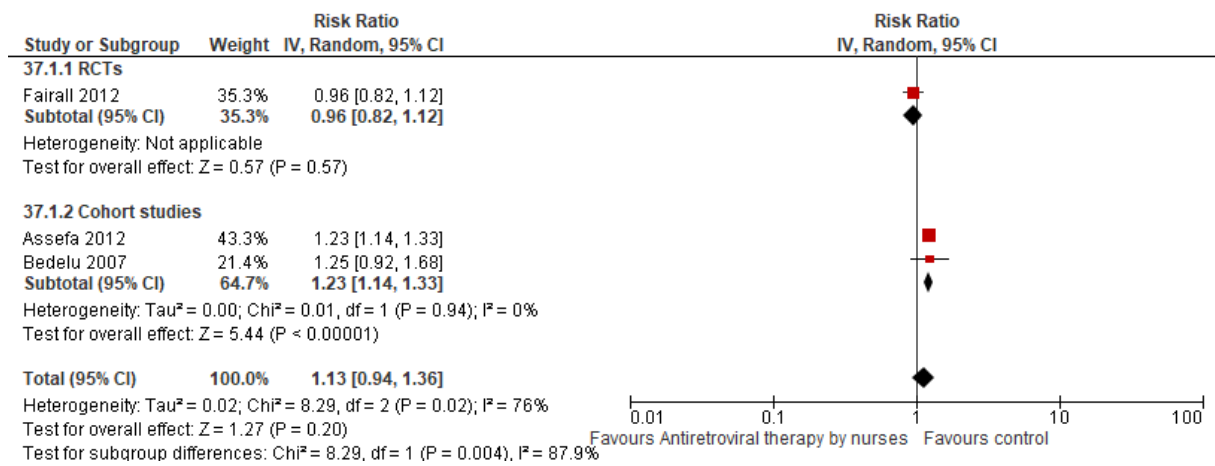

**Figure S59:** Kredo 2014; Intervention/ Exposure: Antiretroviral therapy by nurses; Outcome: All-cause mortality

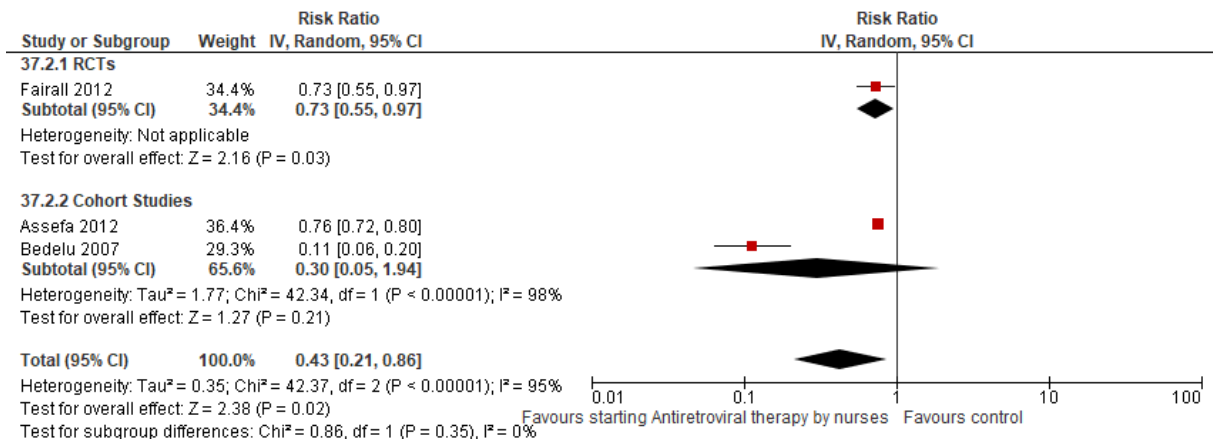

**Figure S60:** Kredo 2014; Intervention/ Exposure: Antiretroviral therapy by nurses; Outcome: Attrition

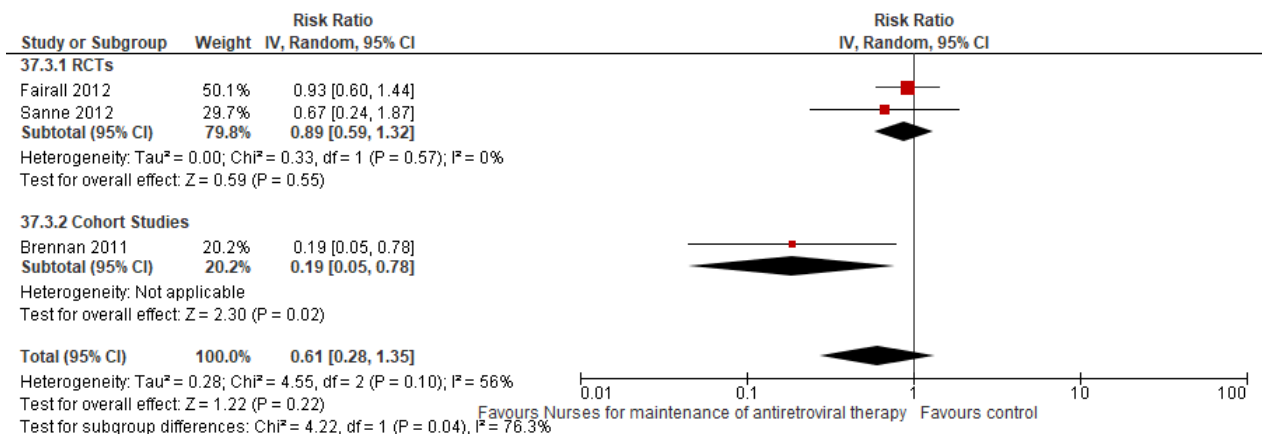

**Figure S61:** Kreda 2014; Intervention/ Exposure: Nurses for maintenance of antiretroviral therapy; Outcome: All-cause mortality

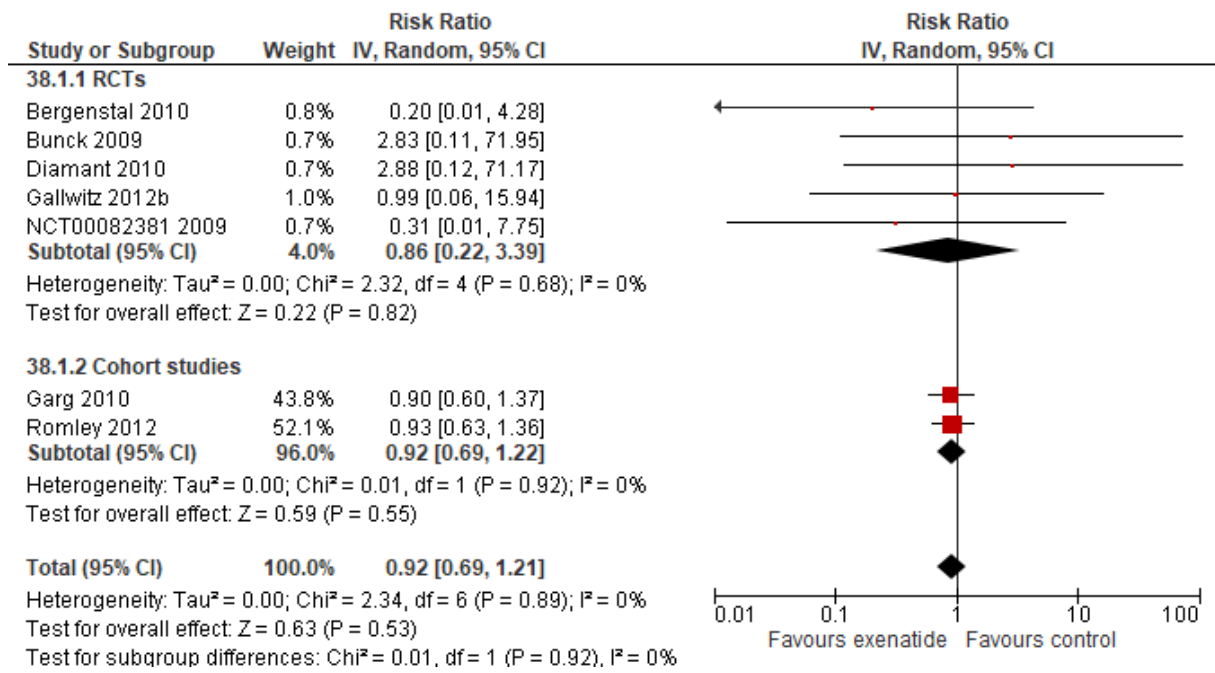

**Figure S62:** Li 2014; Intervention/ Exposure: Exenatide; Outcome: Acute pancreatitis

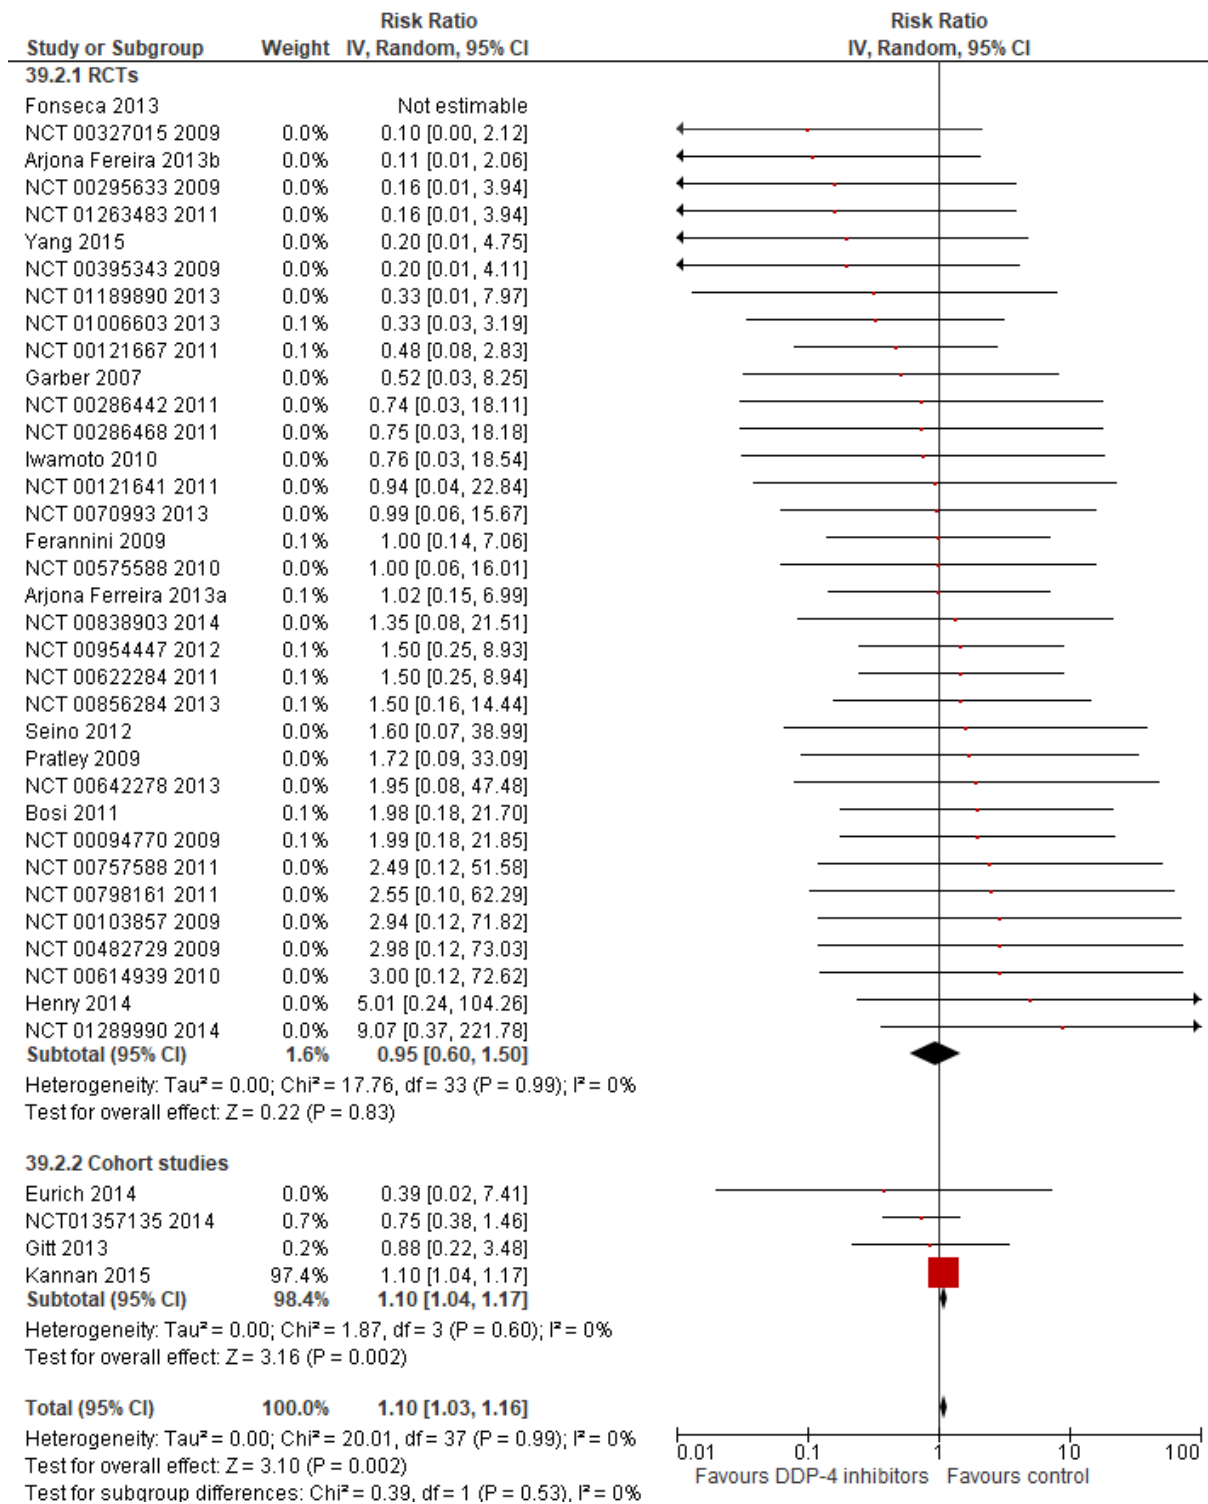

**Figure S63:** Li 2016; Intervention/ Exposure: DDP-4 inhibitors; Outcome: Heart failure

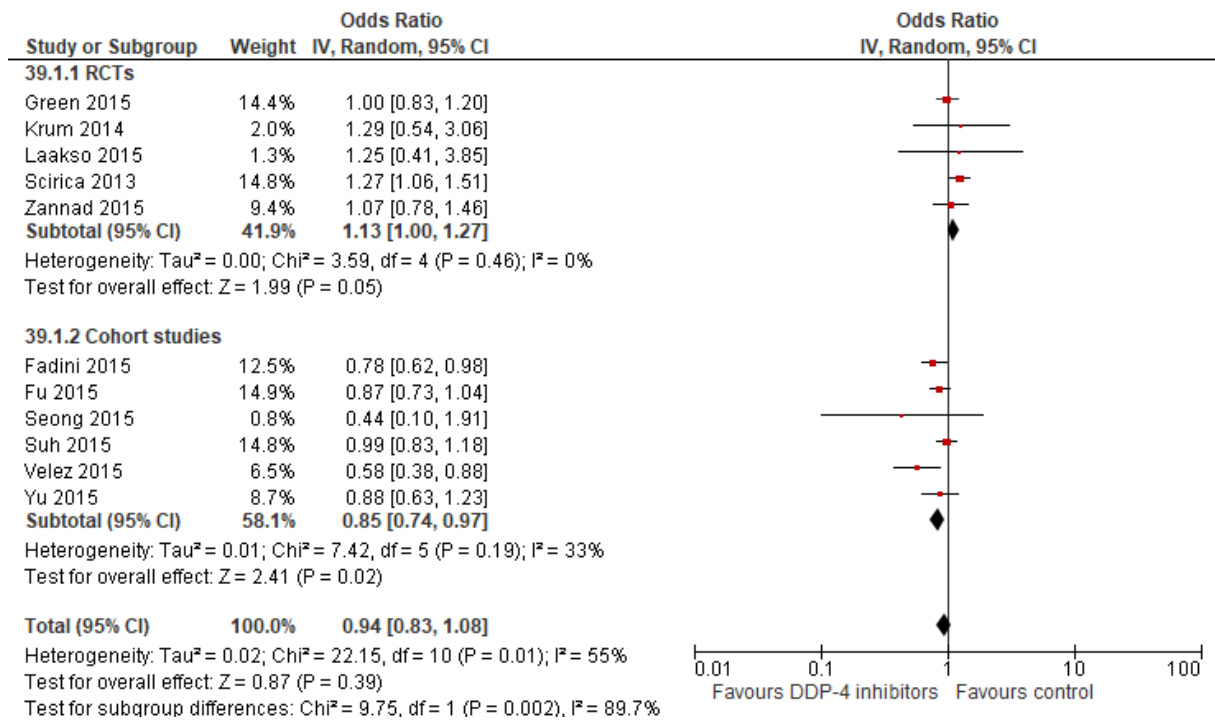

**Figure S64:** Li 2016; Intervention/ Exposure: DDP-4 inhibitors; Outcome: Hospital admission for heart failure



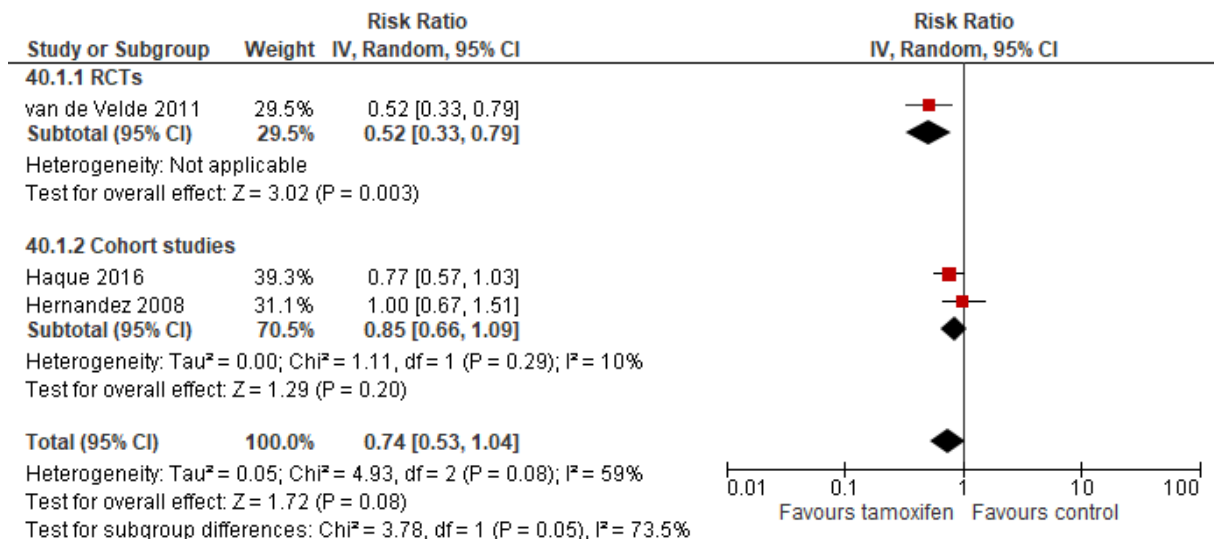

**Figure S65:** Matthews 2018; Intervention/ Exposure: Tamoxifen; Outcome: Heart failure

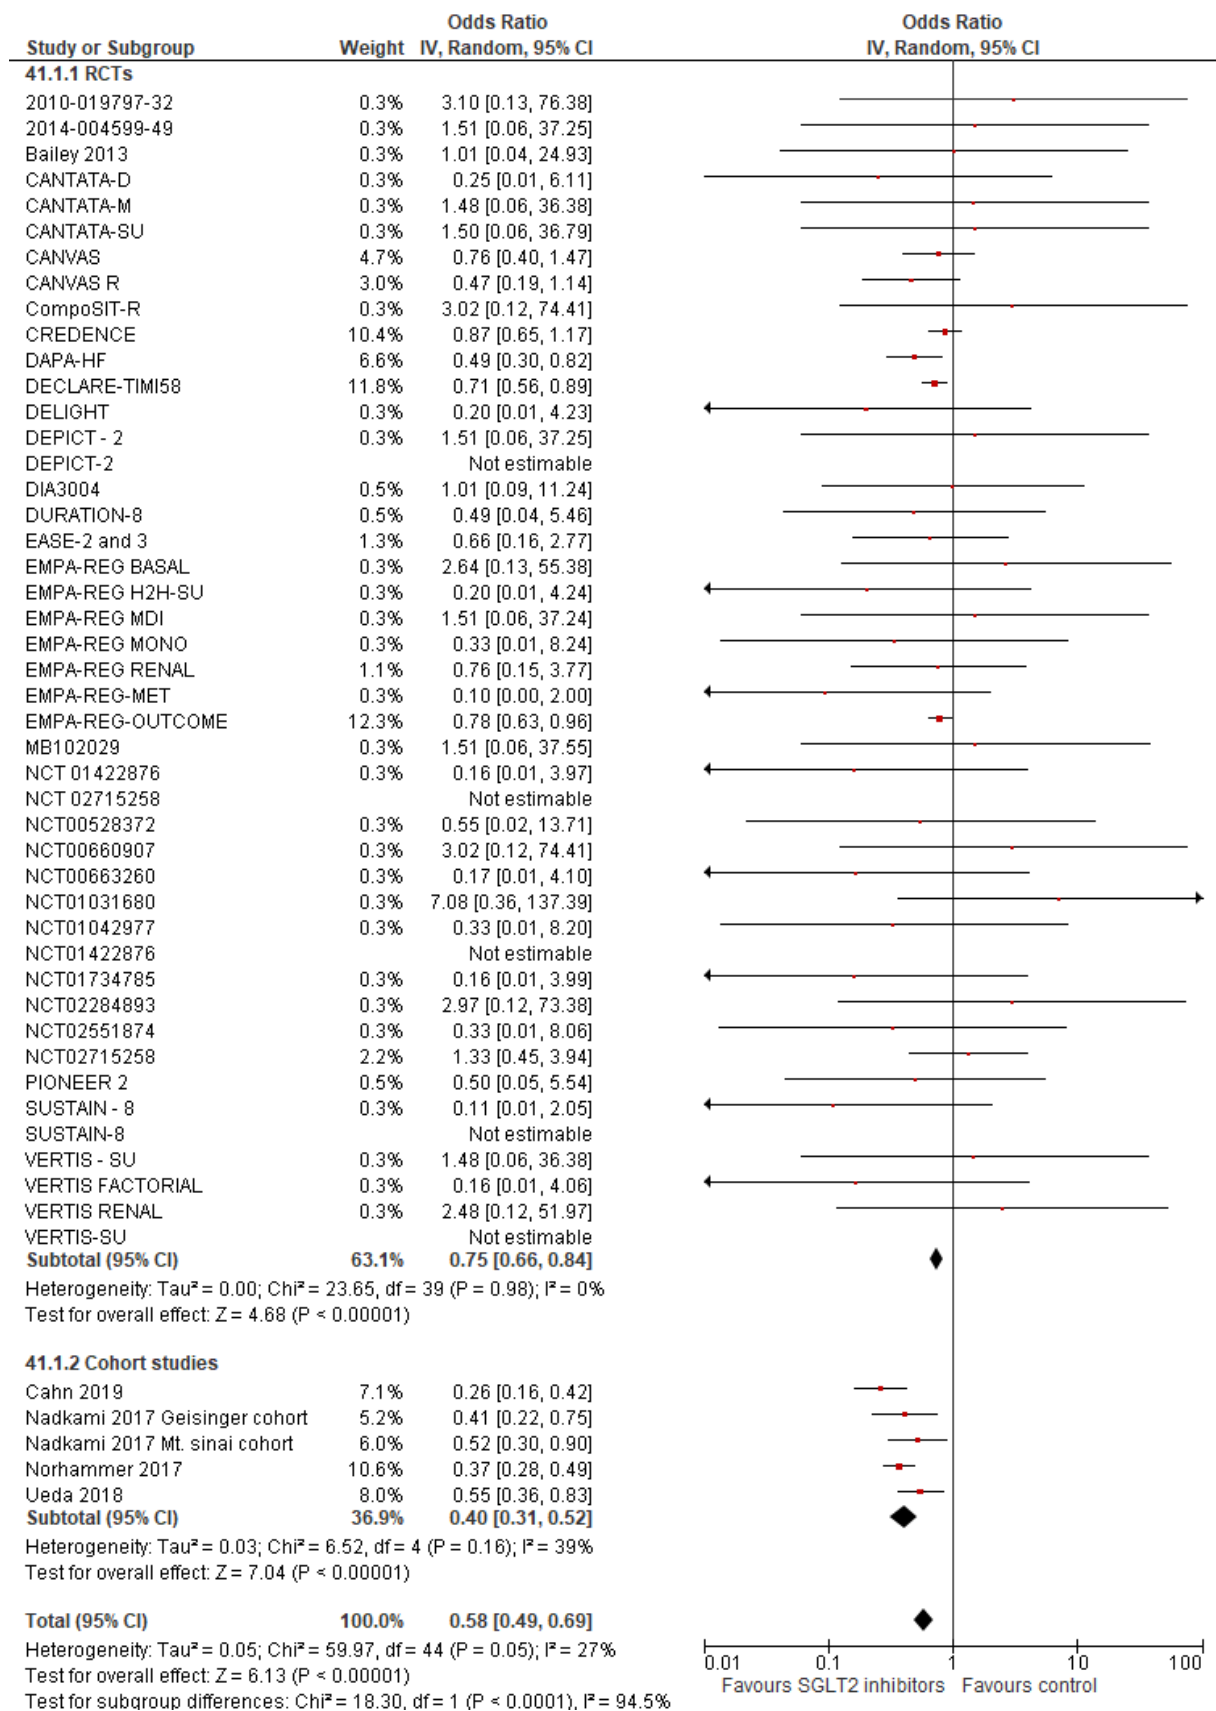

**Figure S66:** Menne 2019; Intervention/ Exposure: SGLT-2 inhibitors; Outcome: Acute kidney injury

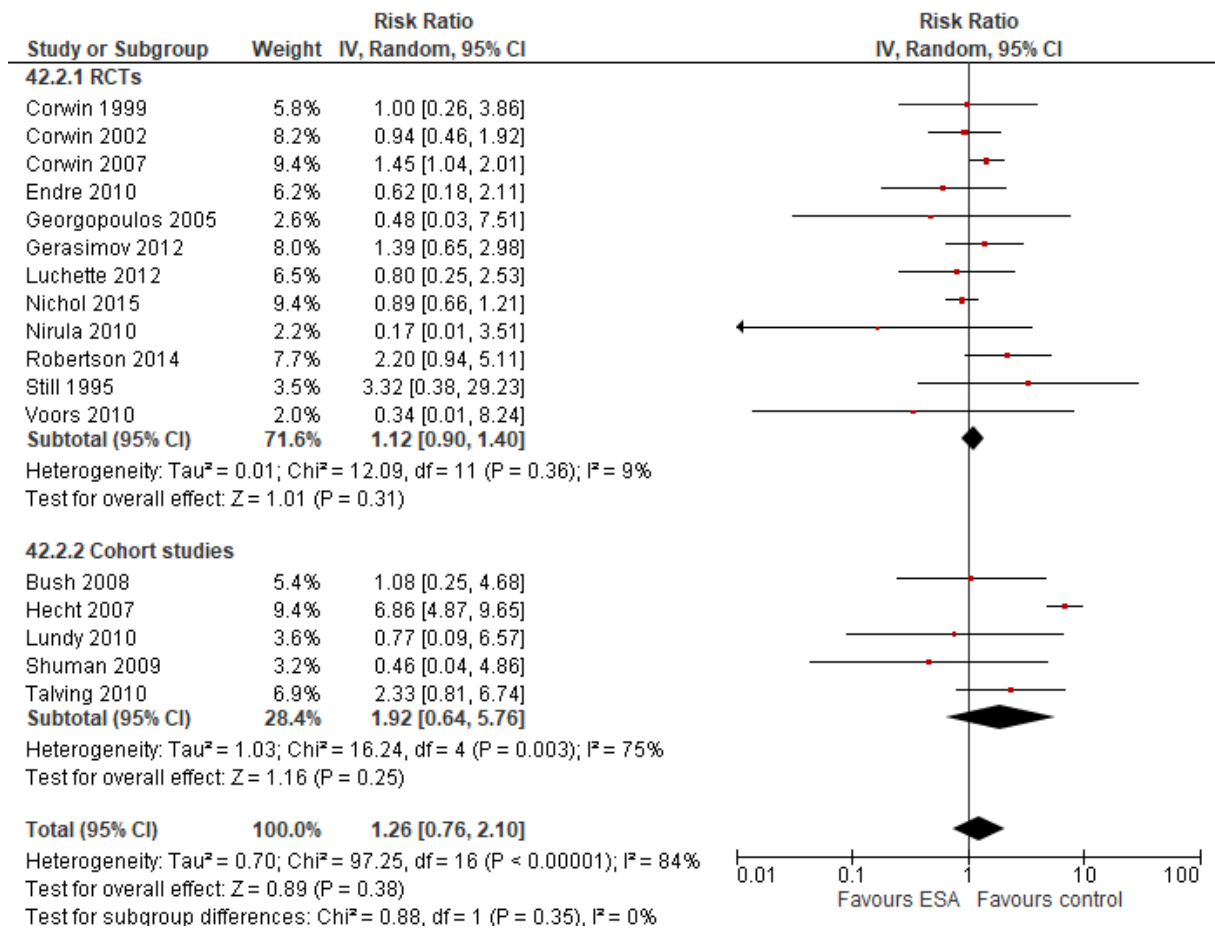

**Figure S67:** Mesgarpour 2017; Intervention/ Exposure: Erythropoiesis stimulating agents; Outcome: Venous thromboembolism

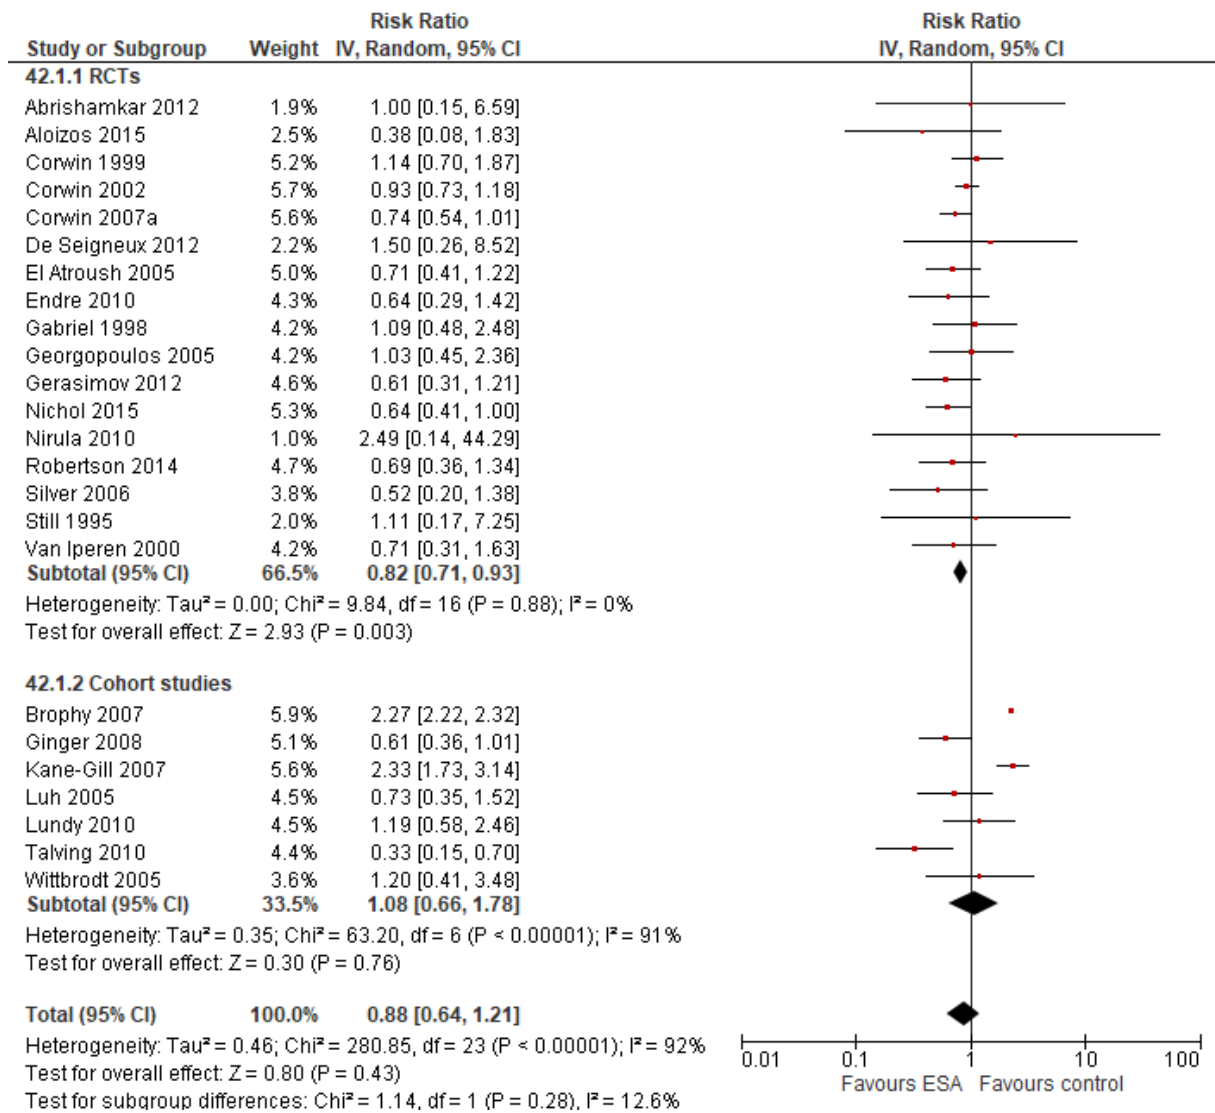

**Figure S68:** Mesgarpour 2017; Intervention/ Exposure: Erythropoiesis stimulating agents; Outcome: All-cause mortality

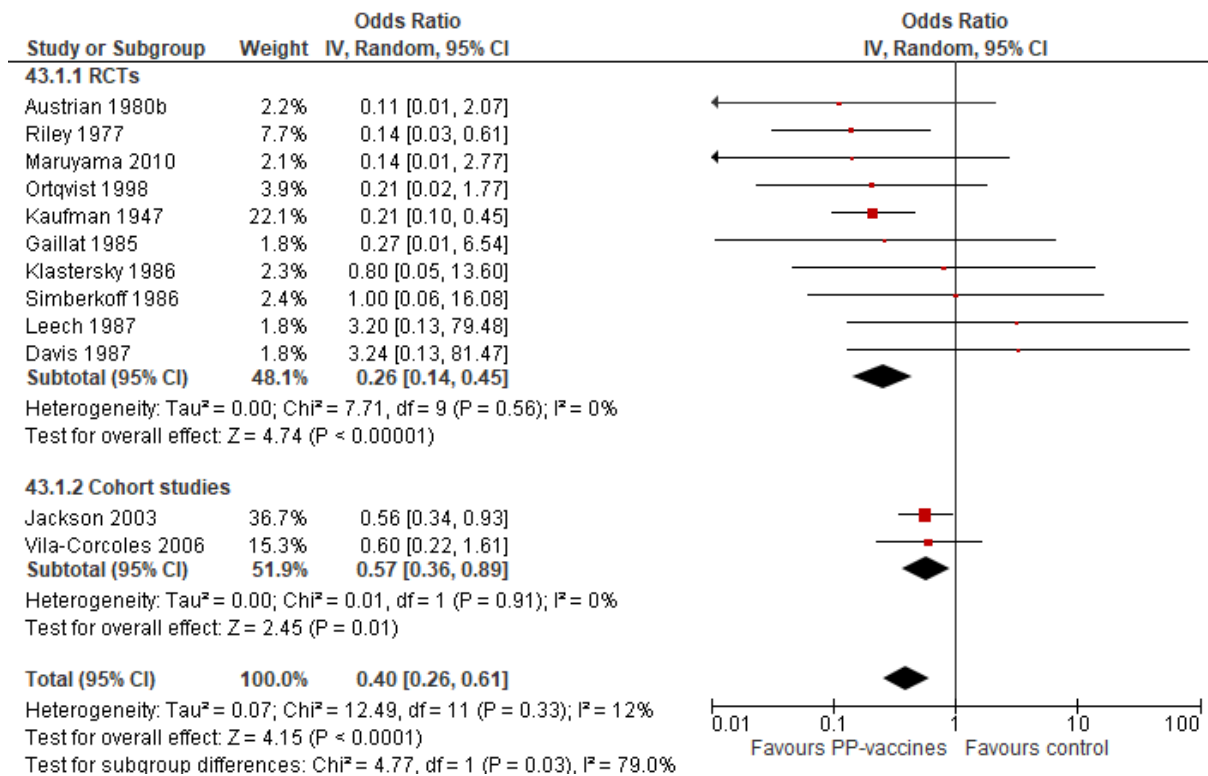

**Figure S69:** Moberley 2013; Intervention/ Exposure: Pneumococcal polysaccharide vaccines; Outcome: Invasive pneumococcal disease

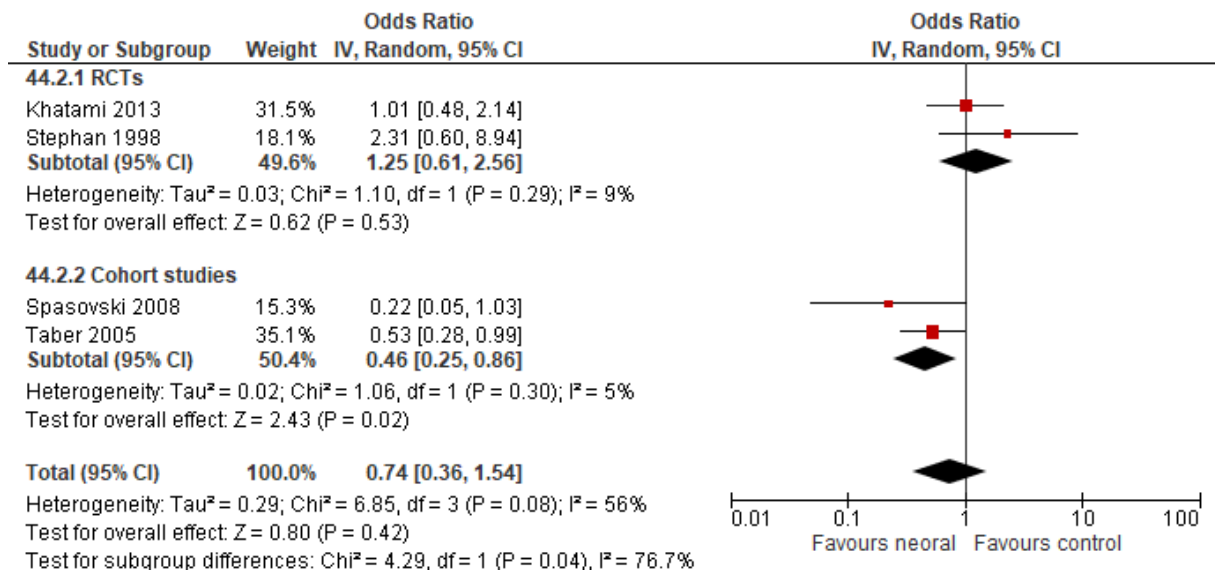

**Figure S70:** Molnar 2015; Intervention/ Exposure: Neoral (Cyclosporin); Outcome: Acute rejection of kidney transplant

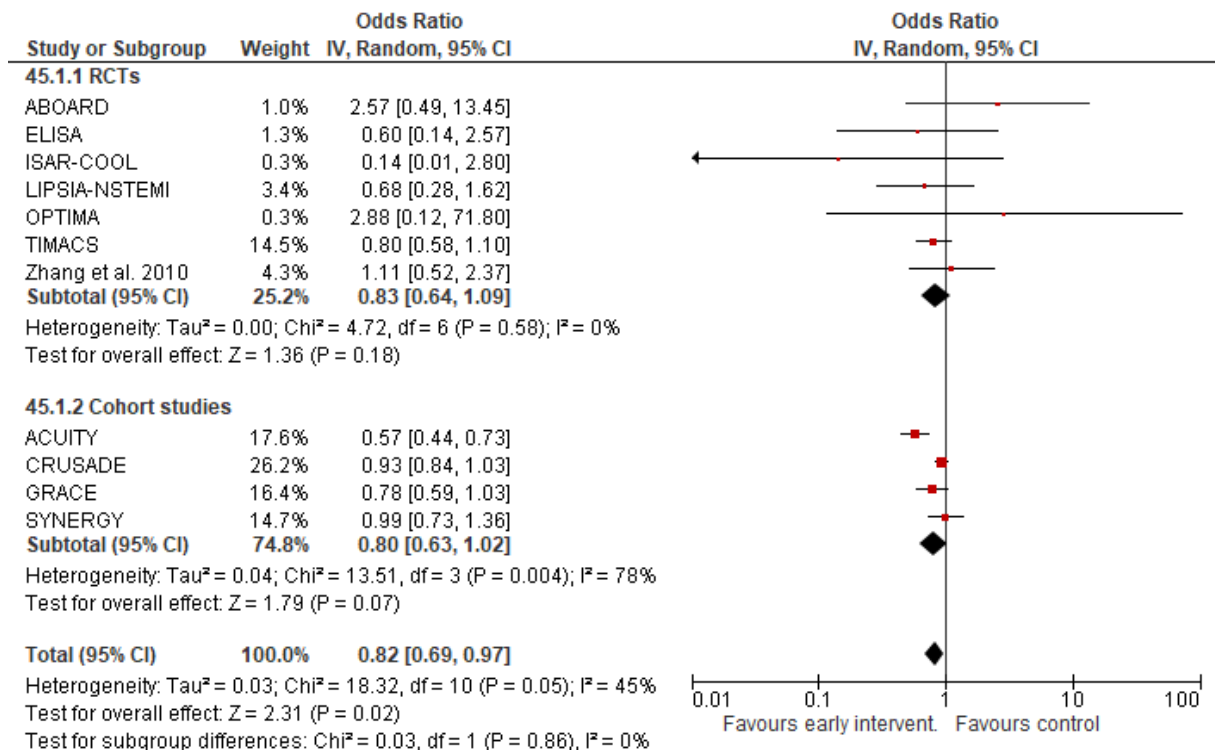

**Figure S71:** Navarese 2013; Intervention/ Exposure: Early intervention for NSTEMI-ACS; Outcome: All-cause mortality

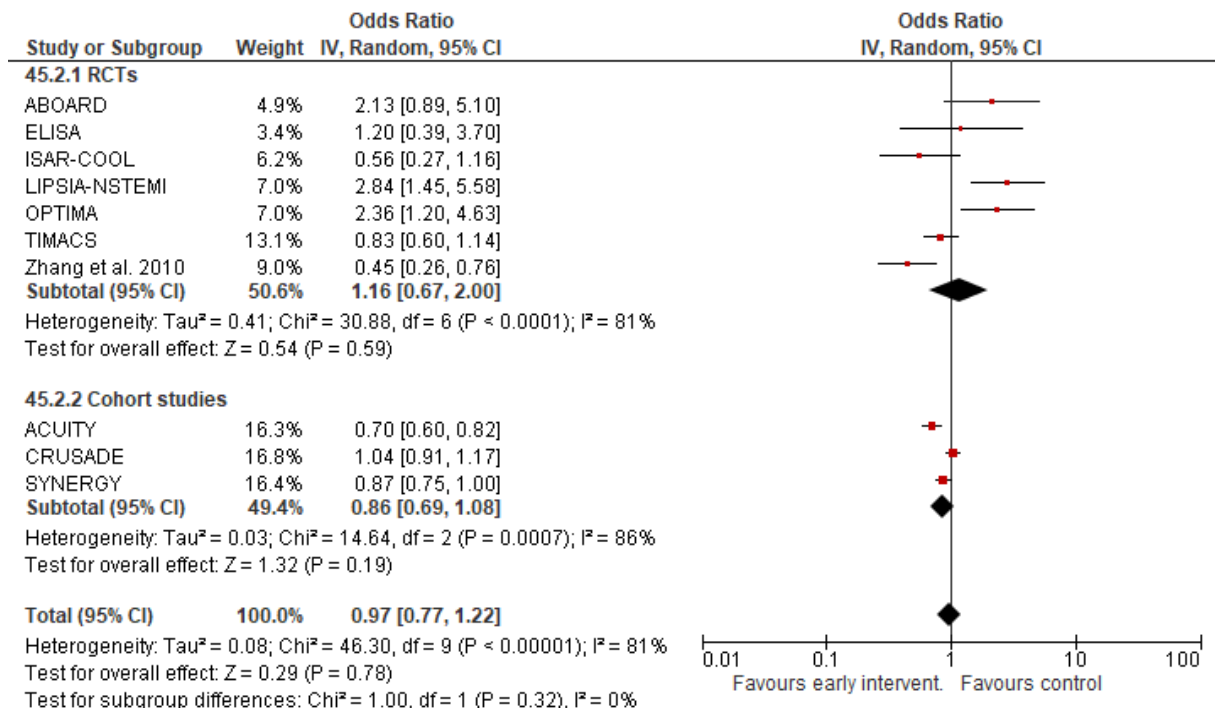

**Figure S72:** Navarese 2013; Intervention/ Exposure: Early intervention for NSTEMI-ACS; Outcome: Myocardial infarction



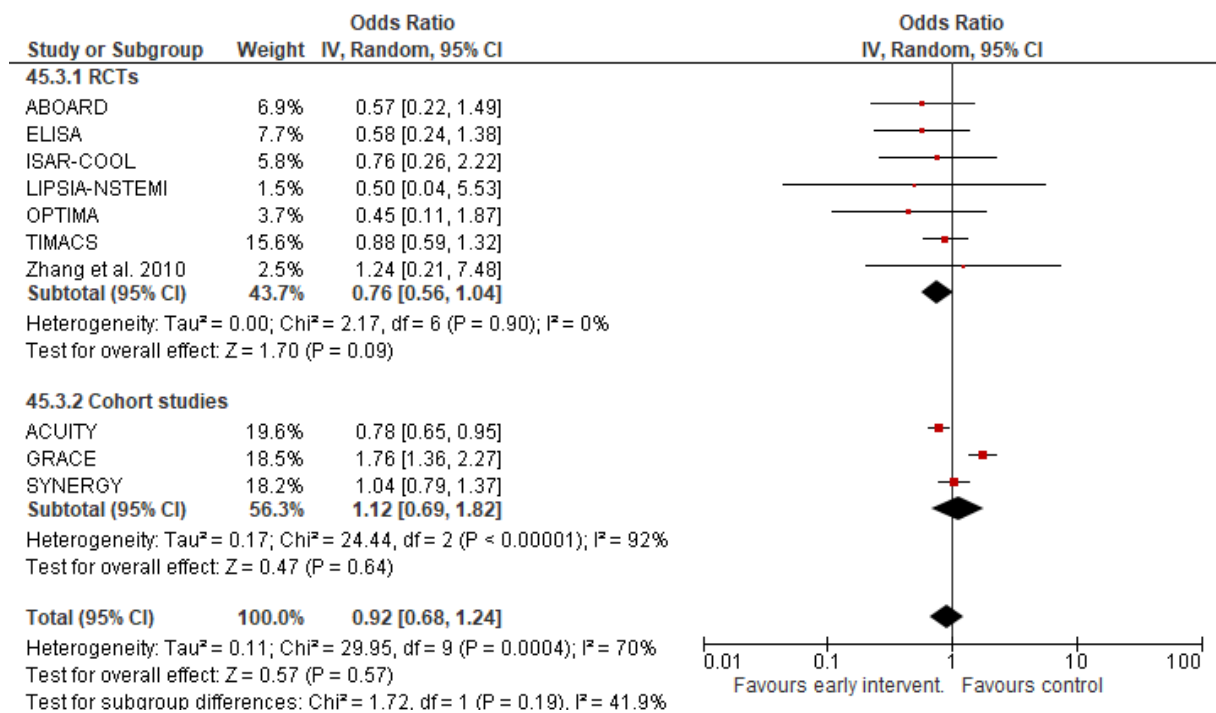

**Figure S73:** Navarese 2013; Intervention/ Exposure: Early intervention for NSTEMI-ACS; Outcome: Major bleeding

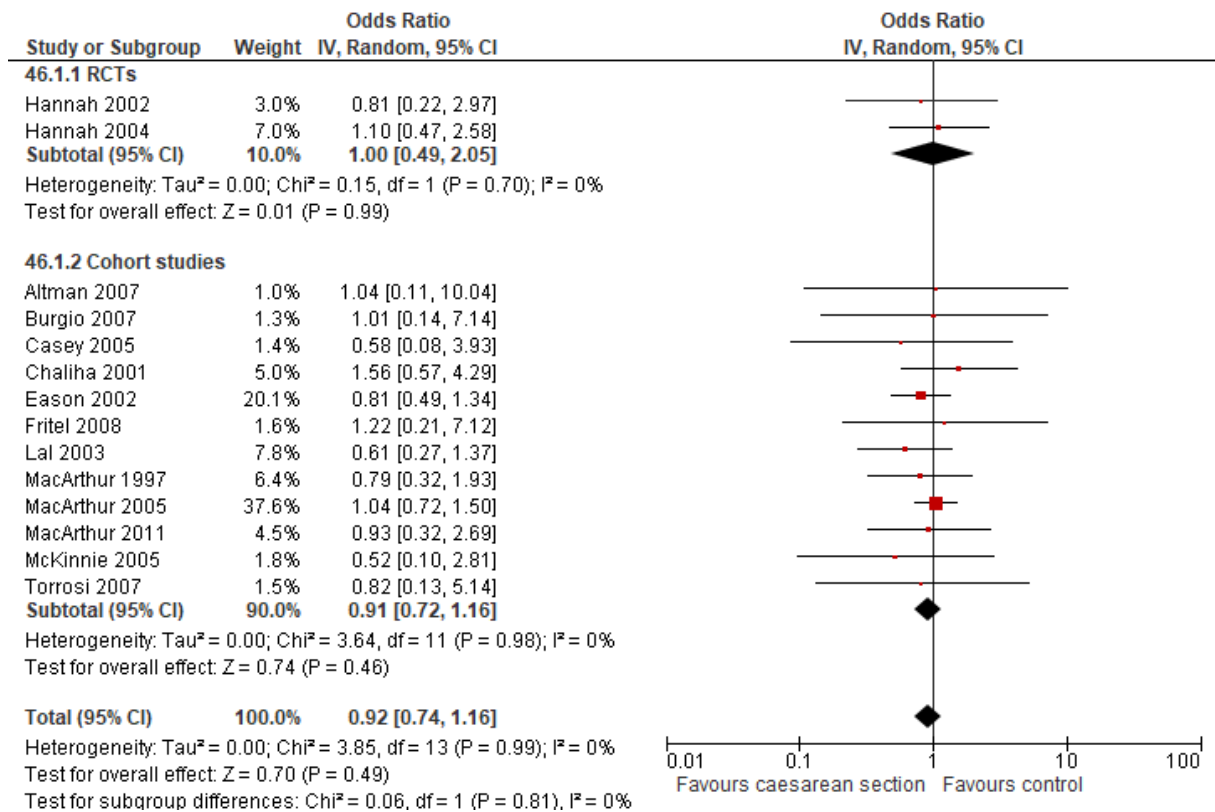

**Figure S74:** Nelson 2010; Intervention/ Exposure: Caesarean section; Outcome: Anal incontinence, feces

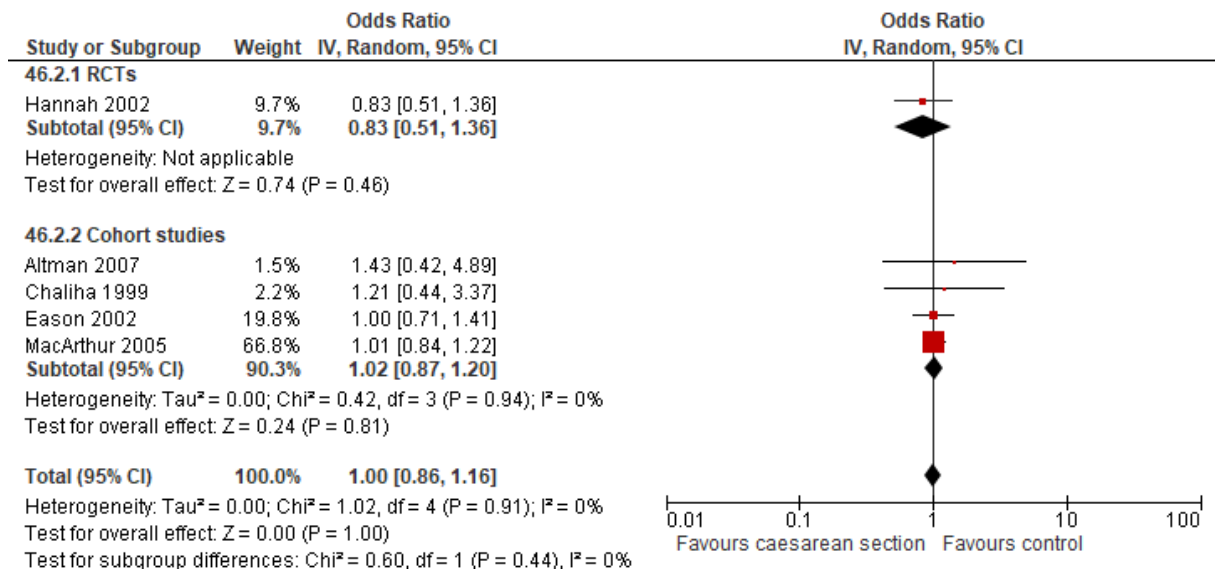

**Figure S75:** Nelson 2010; Intervention/ Exposure: Caesarean section; Outcome: Anal incontinence, flatus

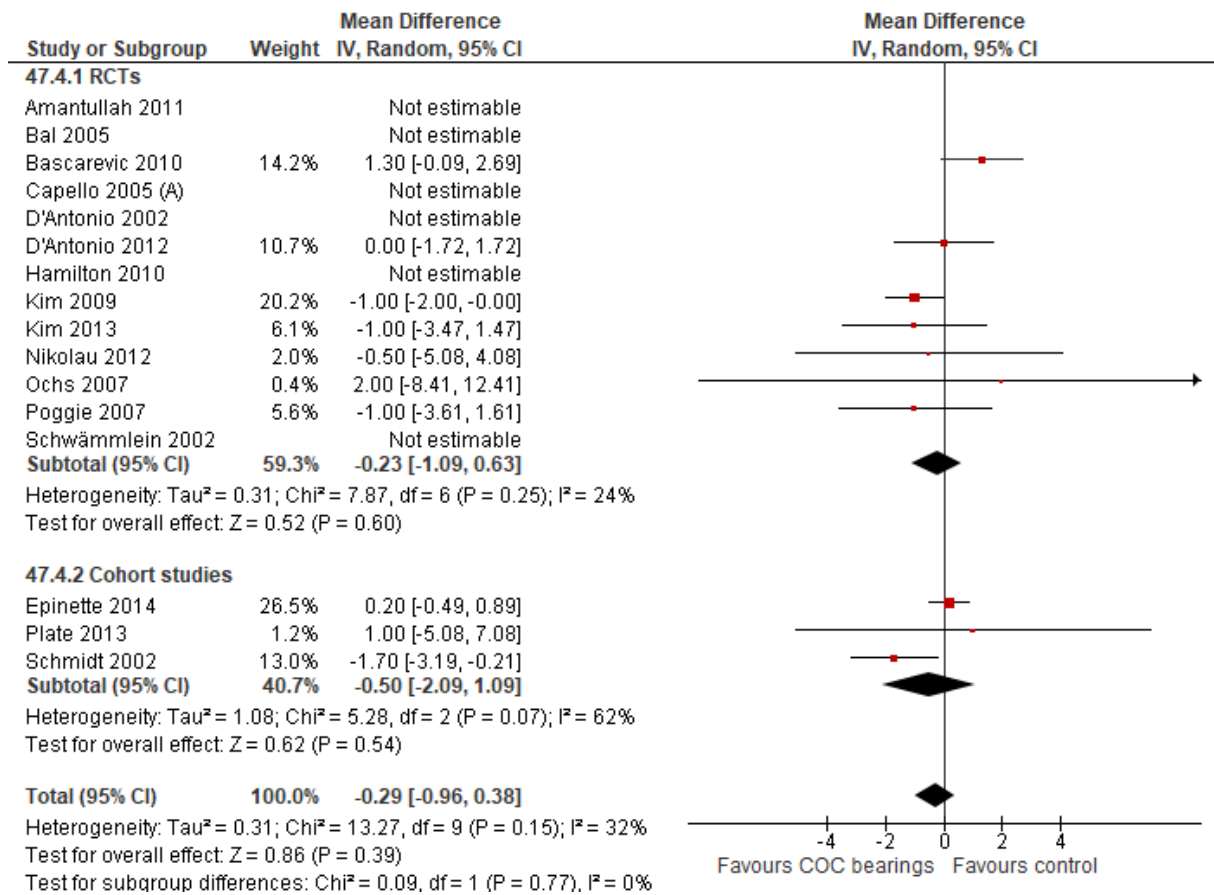

**Figure S76:** Nieuwenhuijse 2014; Intervention/ Exposure: Ceramic-on-ceramic bearings for total hip arthroplasty; Outcome: Harris Hip Score

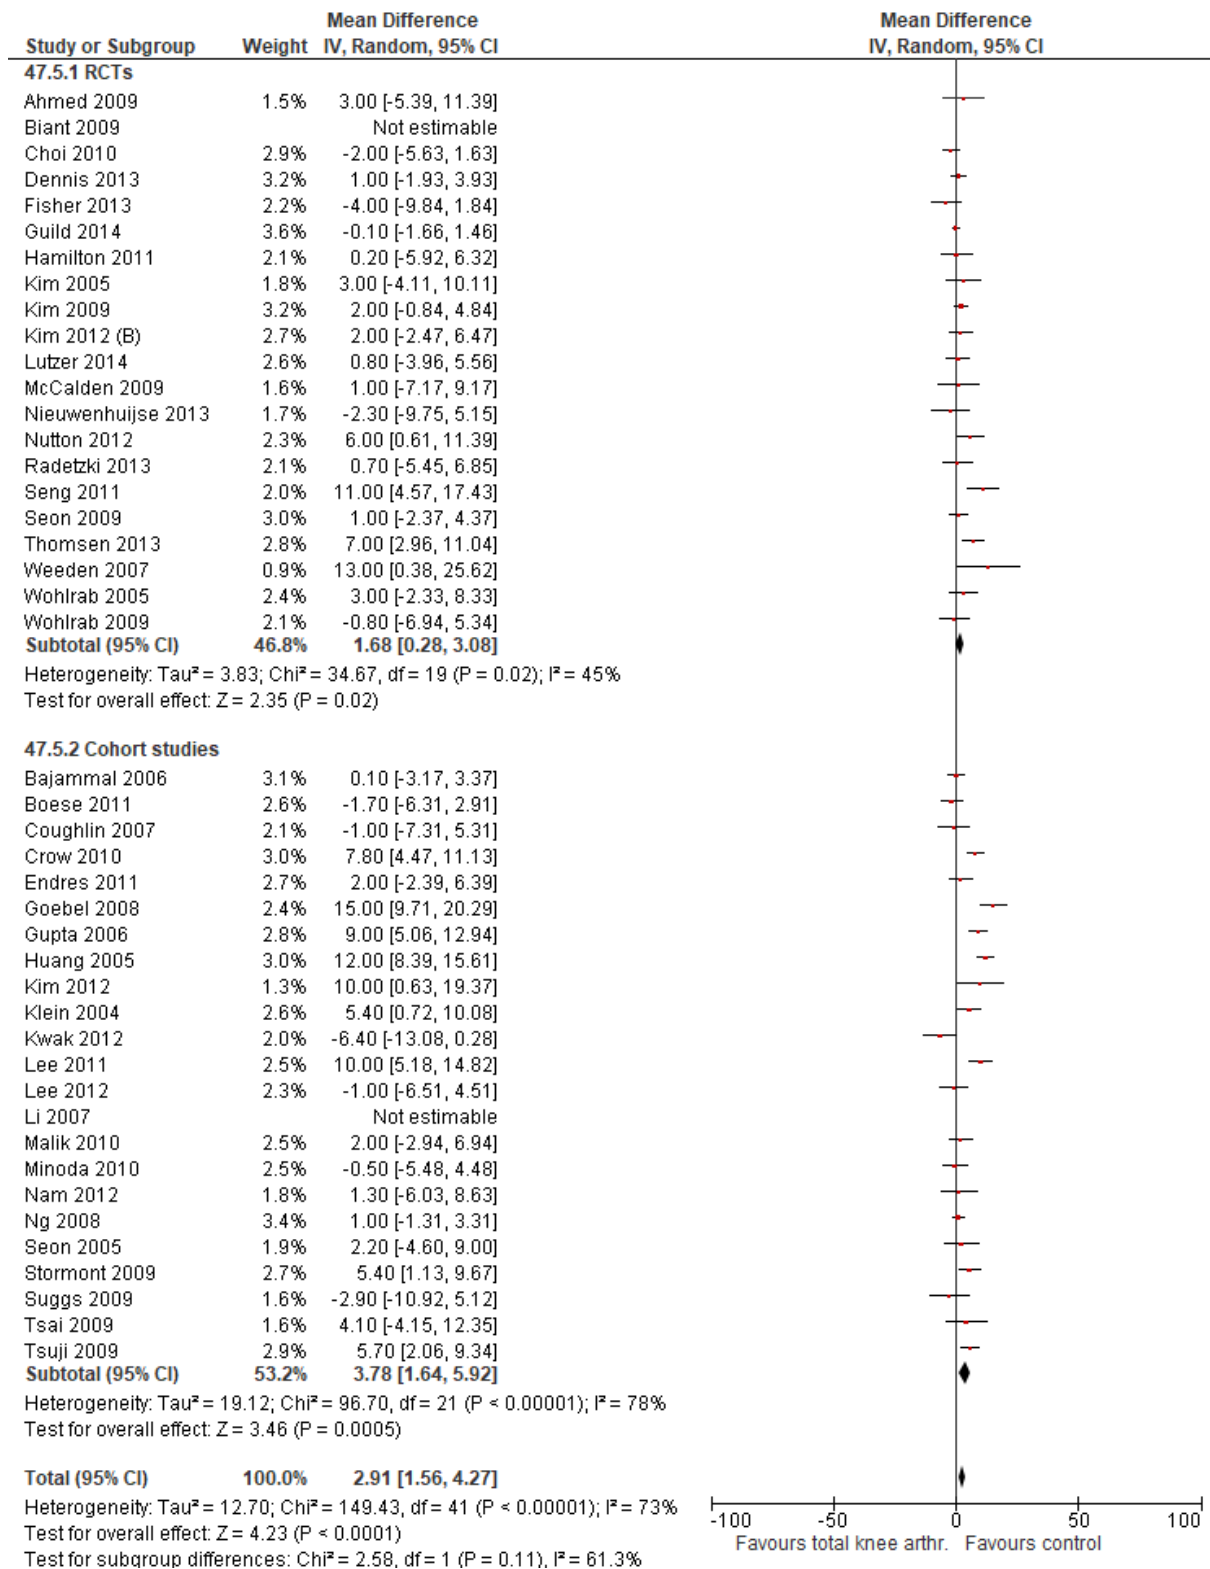

**Figure S77:** Nieuwenhuijse 2014; Intervention/ Exposure: High-flexion total knee arthroplasty; Outcome: Flexion in degrees

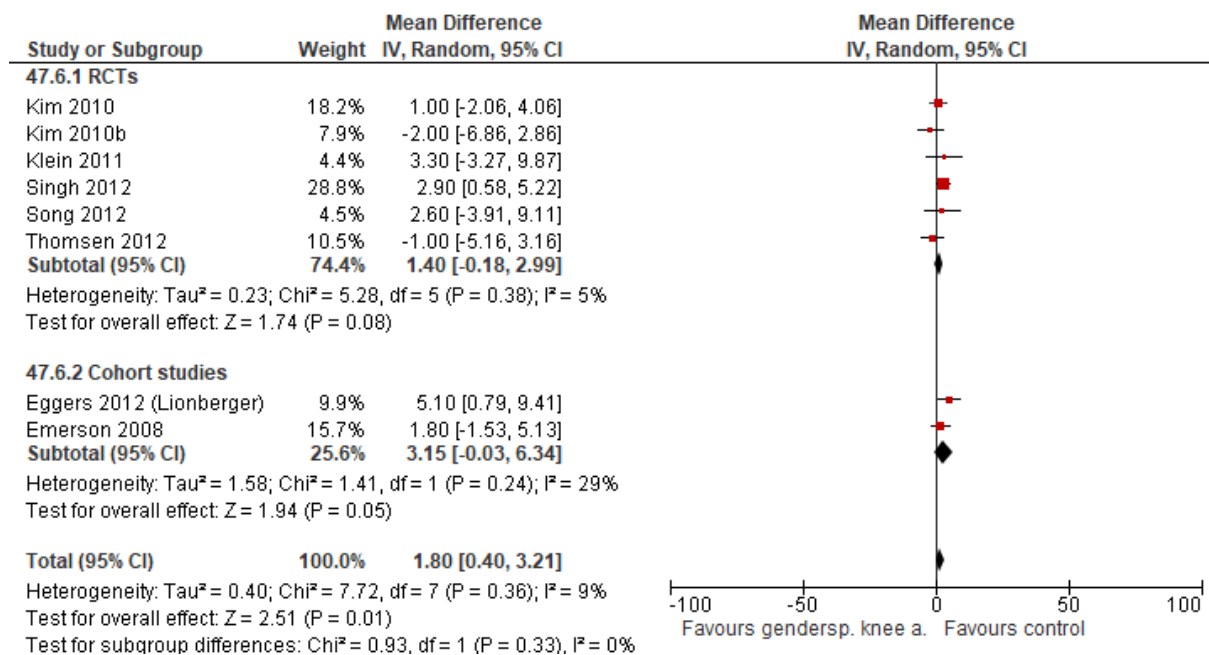

**Figure S78:** Nieuwenhuijse 2014; Intervention/ Exposure: Gender-specific total knee arthroplasty; Outcome: Flexion-extension range

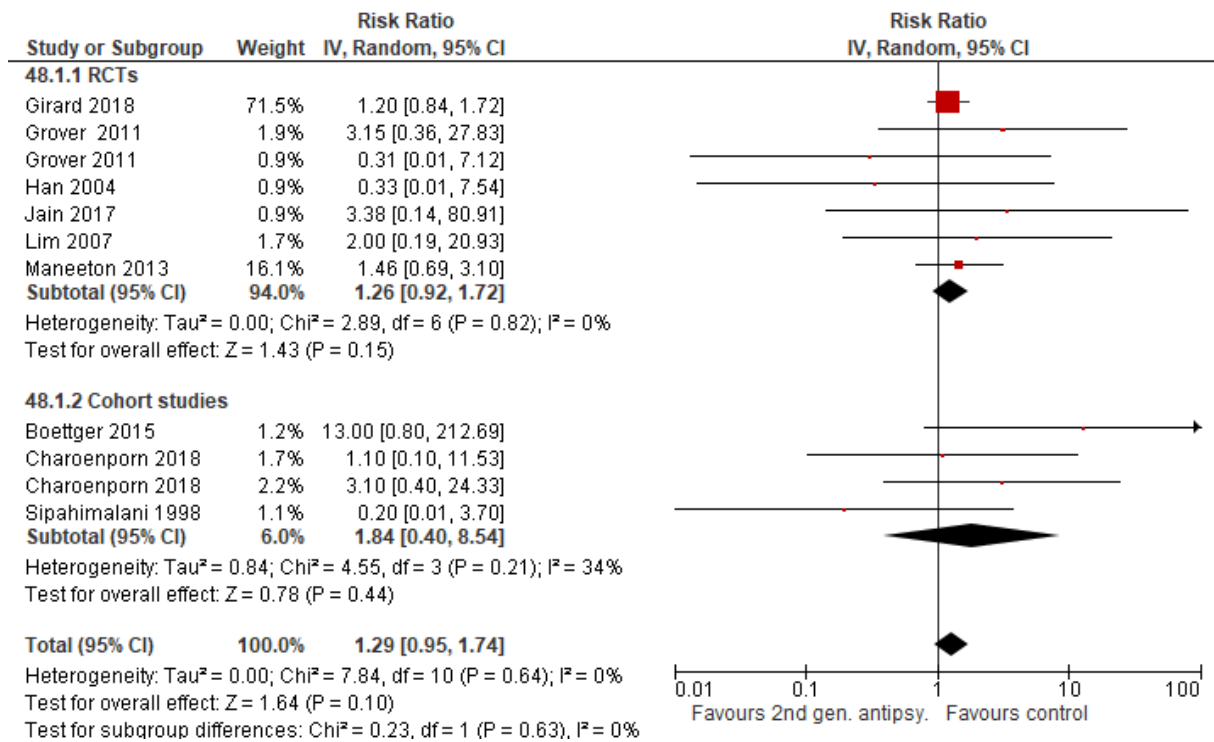

**Figure S79:** Nikooie 2019; Intervention/ Exposure: Second generation antipsychotics; Outcome: Sedation

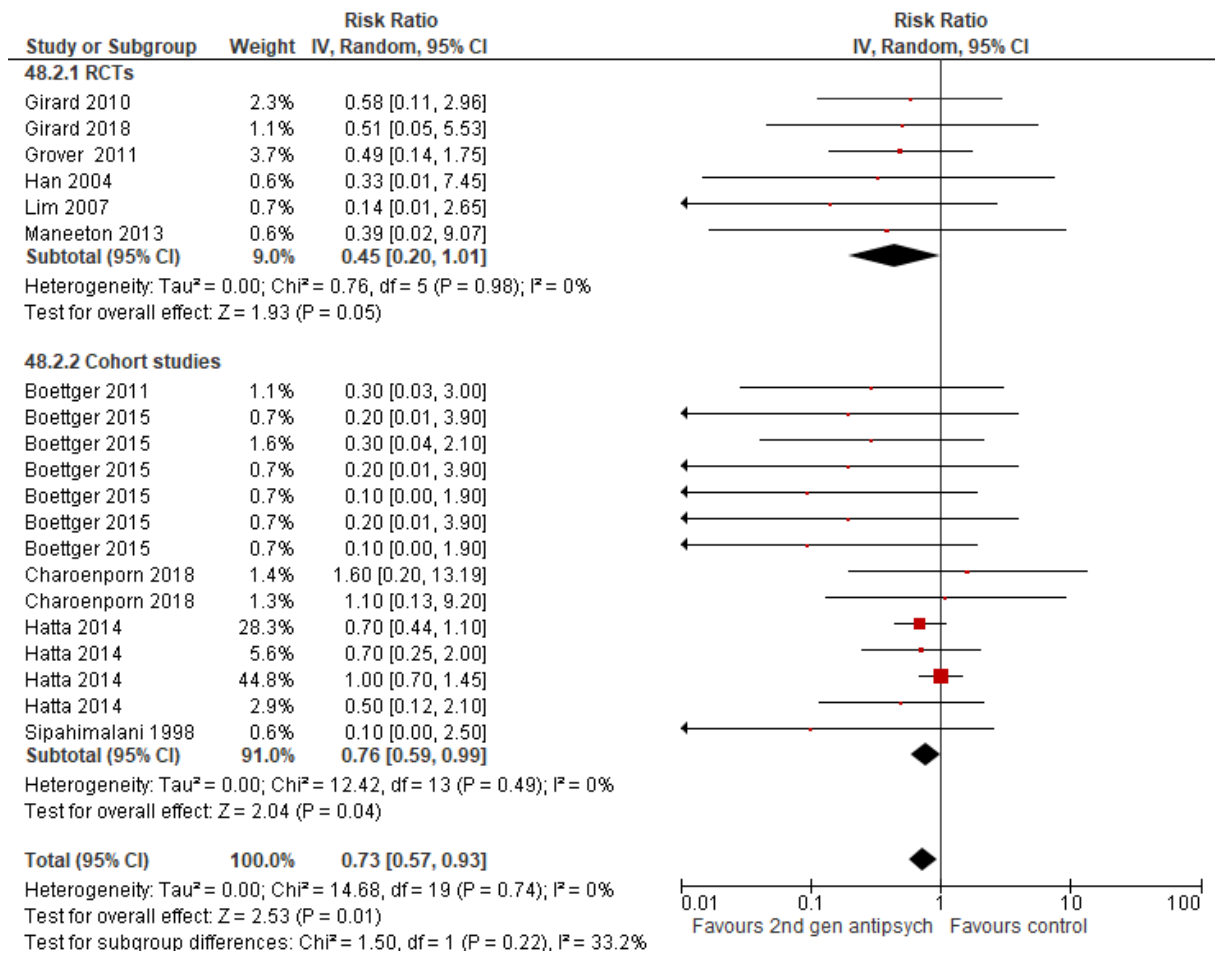

**Figure S80:** Nikooie 2019; Intervention/ Exposure: Second generation antipsychotics; Outcome: Neurologic outcomes



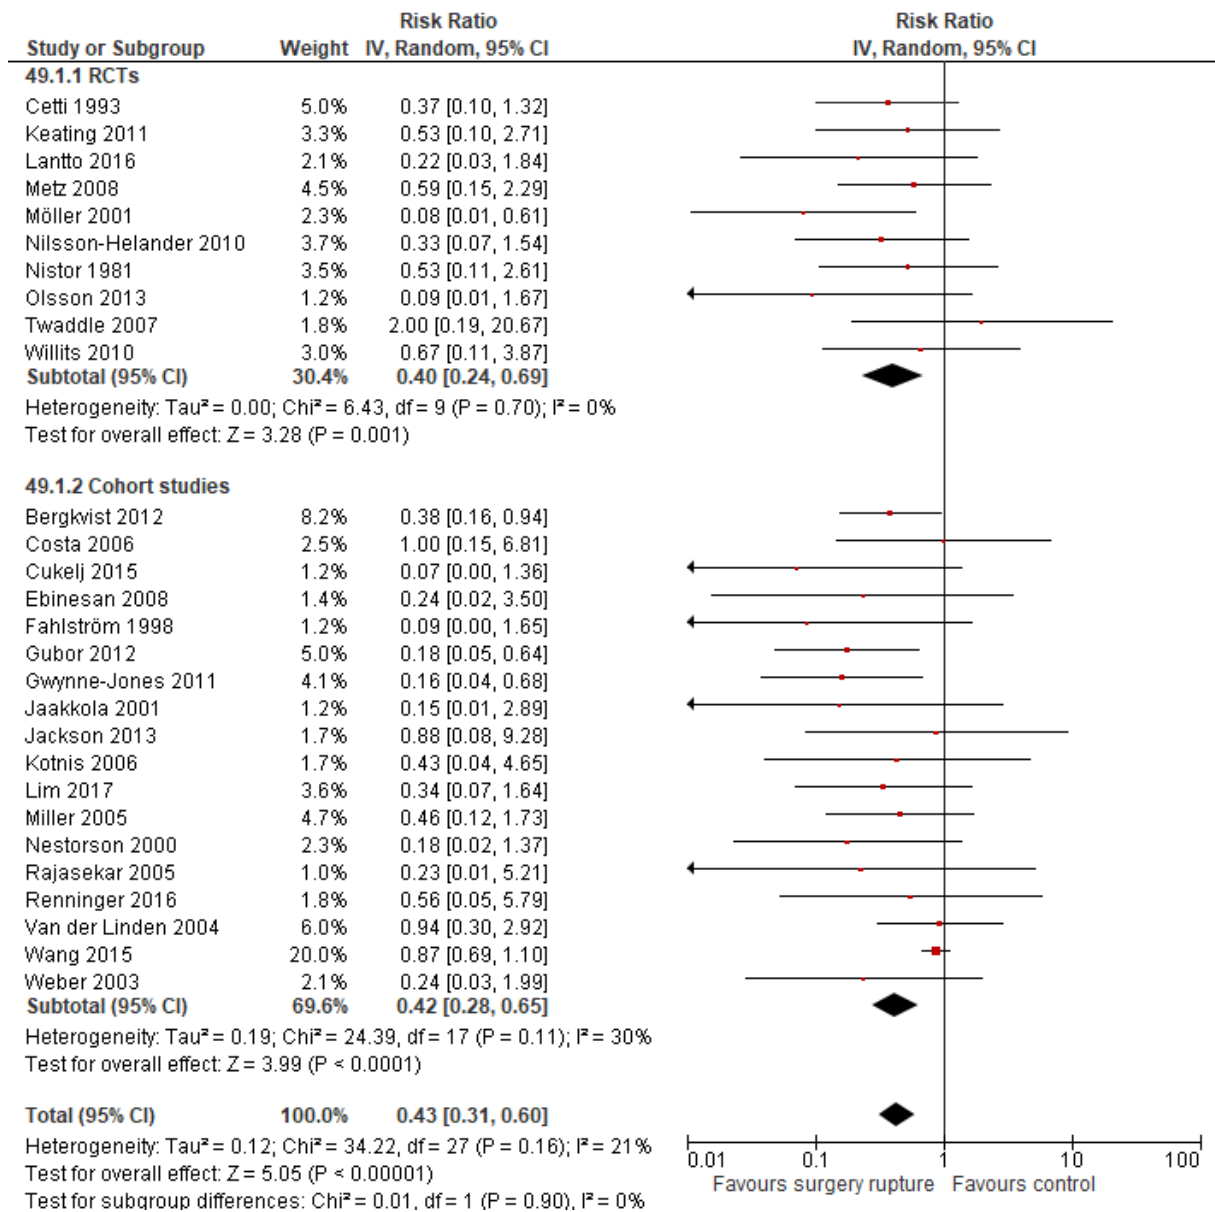

**Figure S81:** Ochen 2019; Intervention/ Exposure: Surgery for achilles tendon rupture; Outcome: Re-rupture

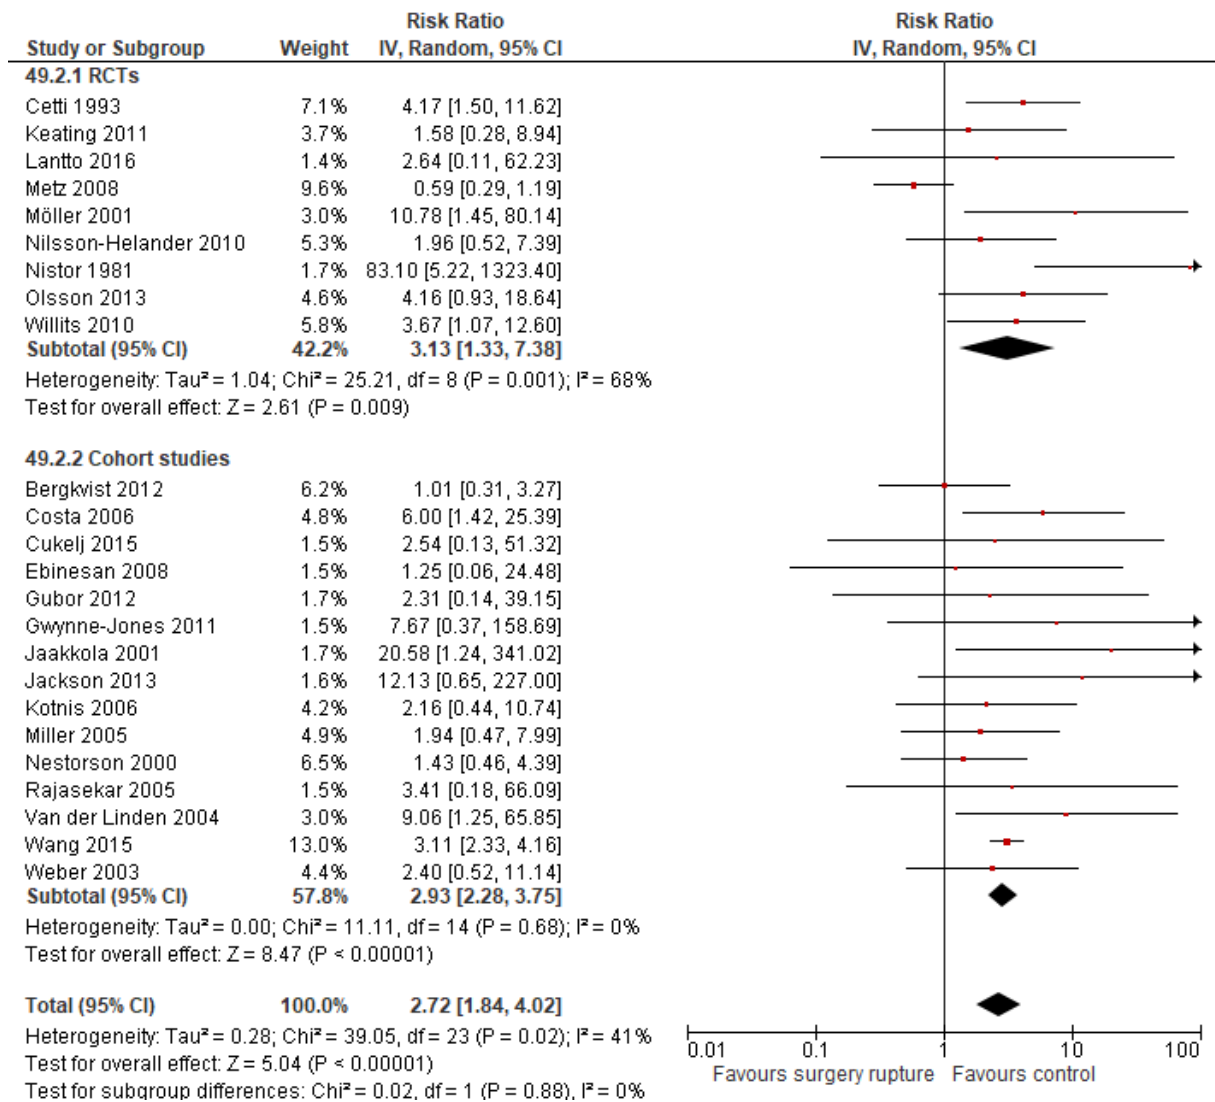

**Figure S82:** Ochen 2019; Intervention/ Exposure: Surgery for achilles tendon rupture; Outcome: Complications

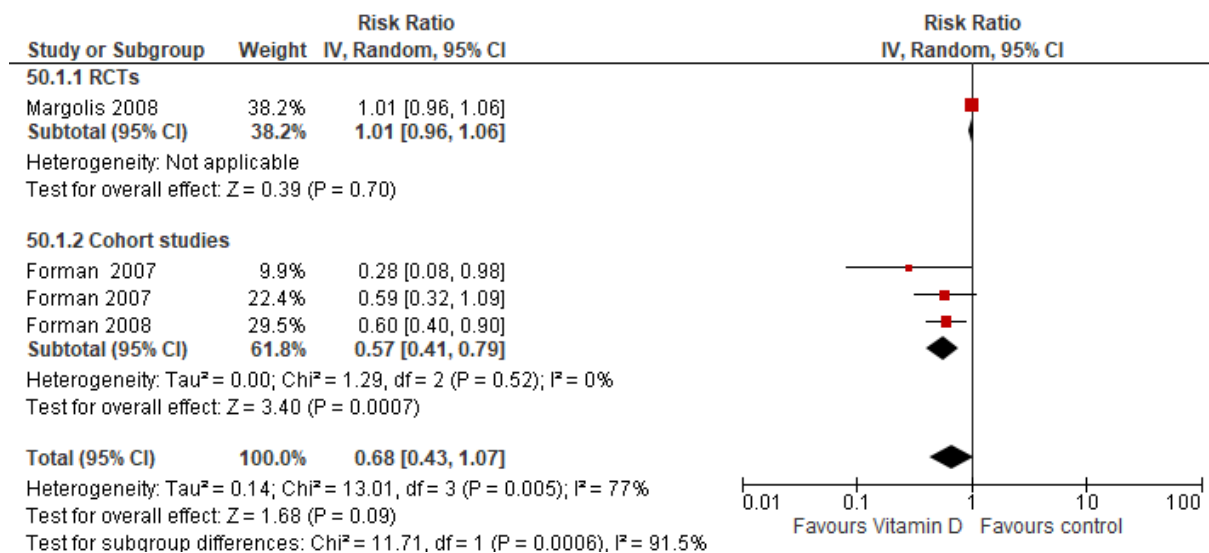

**Figure S83:** Pittas 2010; Intervention/ Exposure: High vitamin D; Outcome: Hypertension

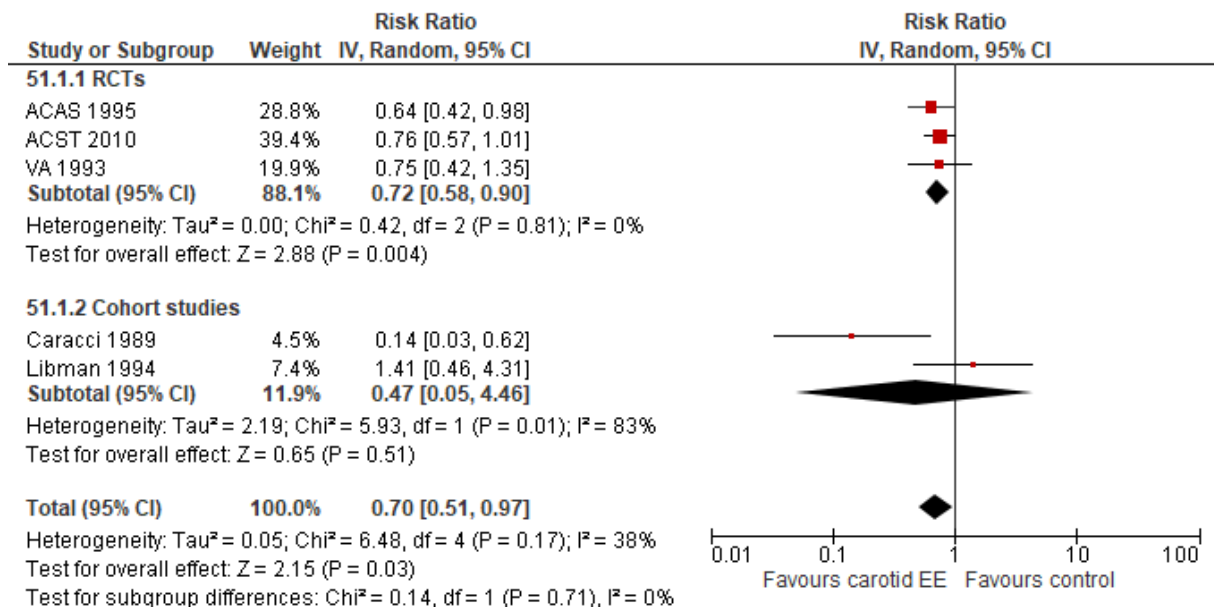

**Figure S84:** Raman 2013; Intervention/ Exposure: Carotid endarterectomy; Outcome: Ipsilateral stroke

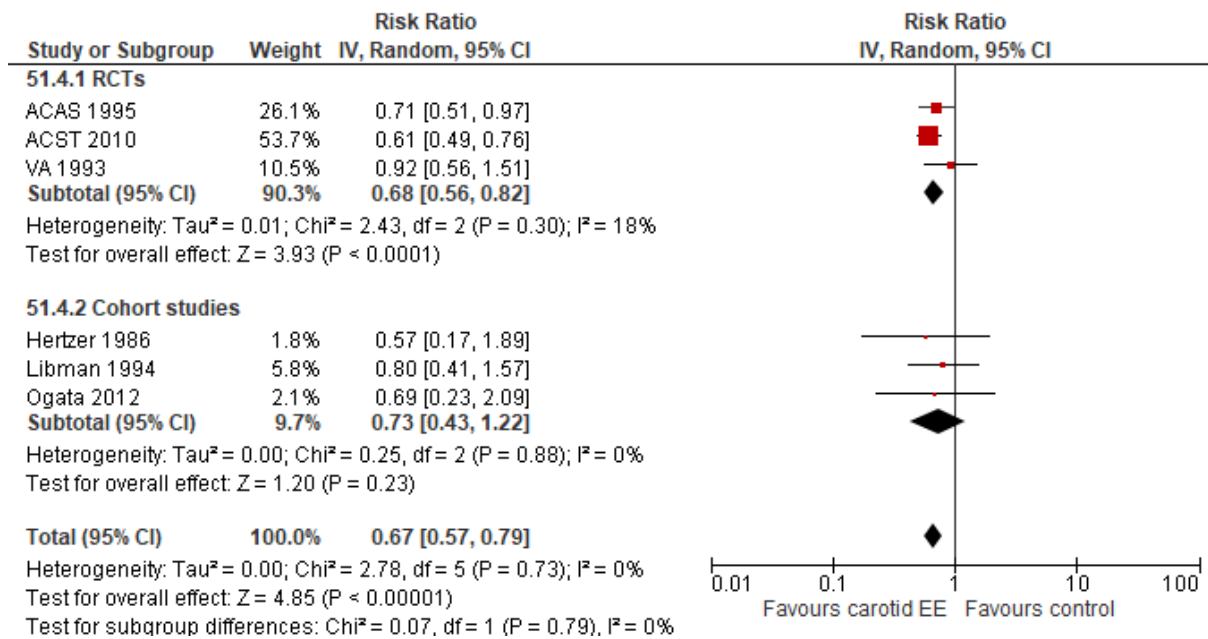

**Figure S85:** Raman 2013; Intervention/ Exposure: Carotid endarterectomy; Outcome: Stroke

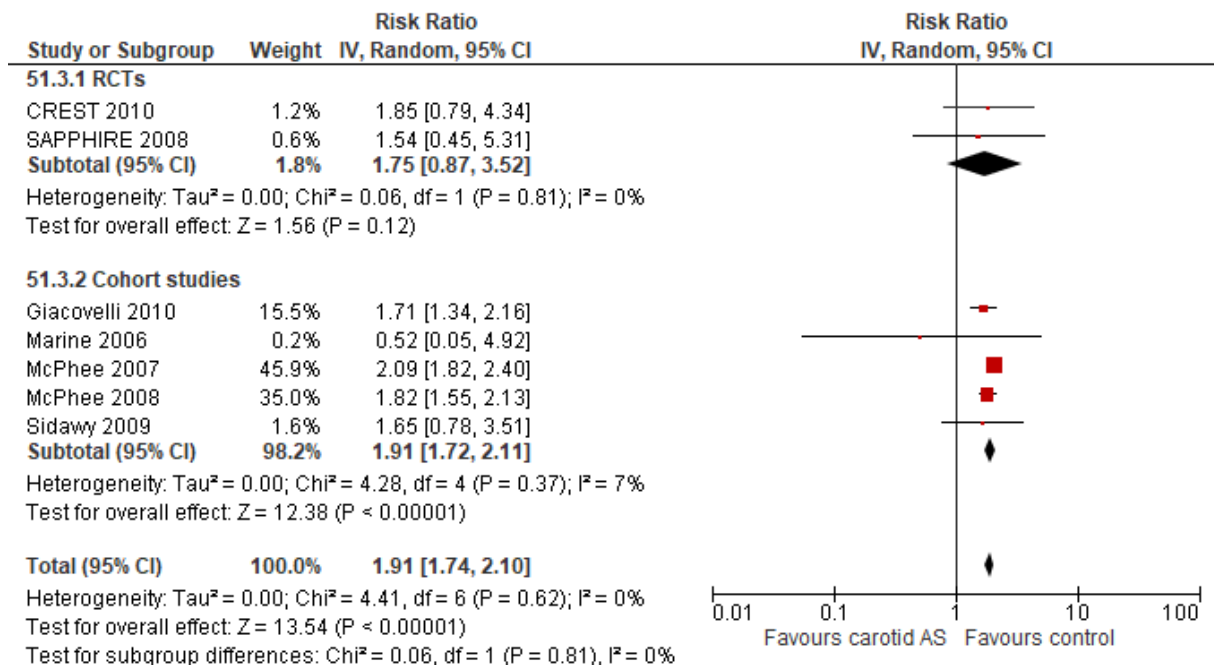

**Figure S86:** Raman 2013; Intervention/ Exposure: Carotid artery stenting; Outcome: Periprocedural stroke

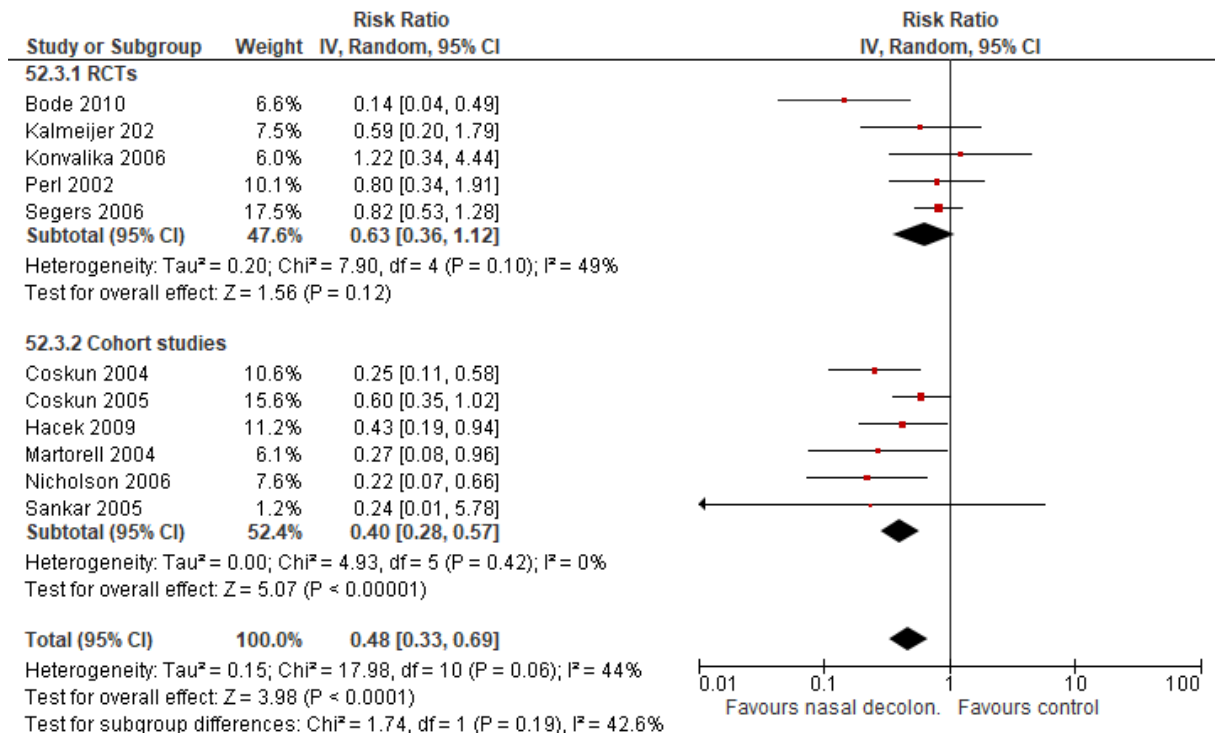

**Figure S87:** Schweizer 2013; Intervention/ Exposure: Nasal decontamination; Outcome: Surgical site infection

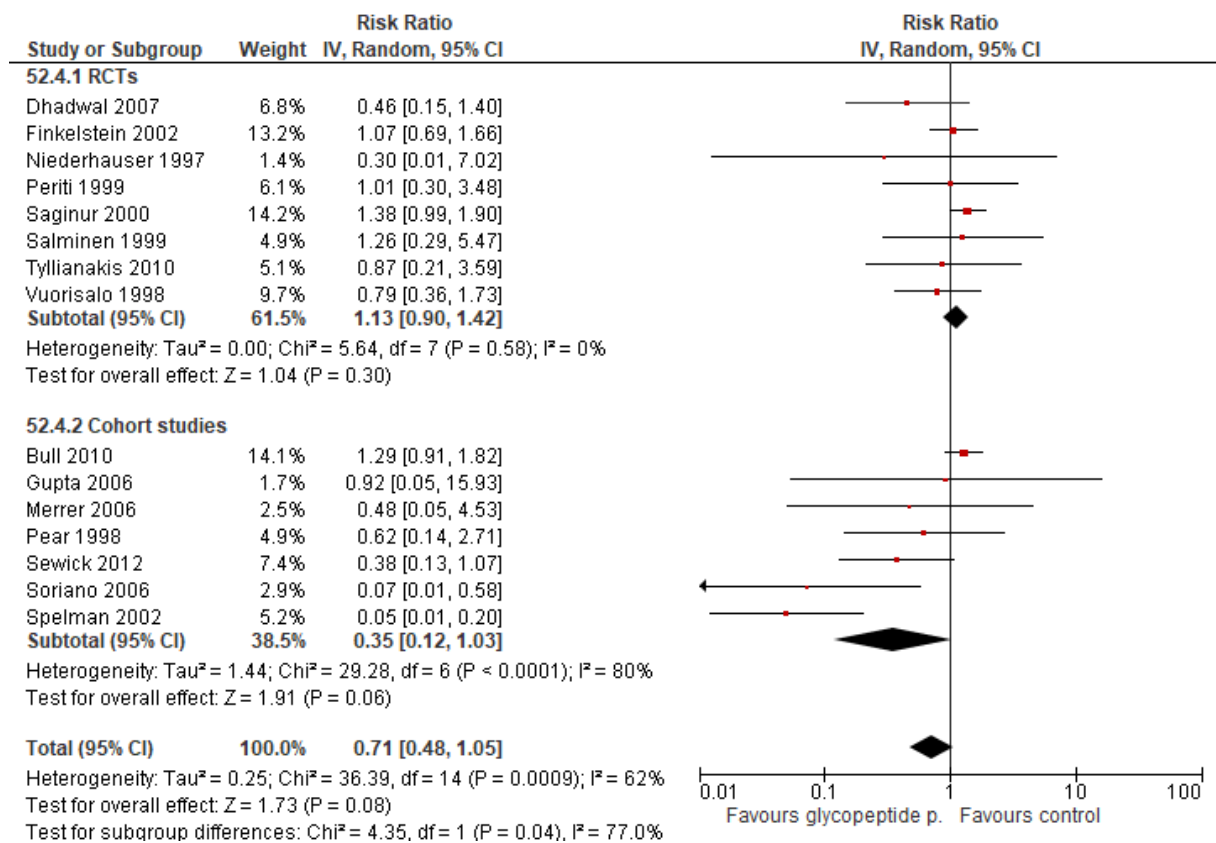

**Figure S88:** Schweizer 2013; Intervention/ Exposure: Glycopeptide prophylaxis; Outcome: Surgical site infection



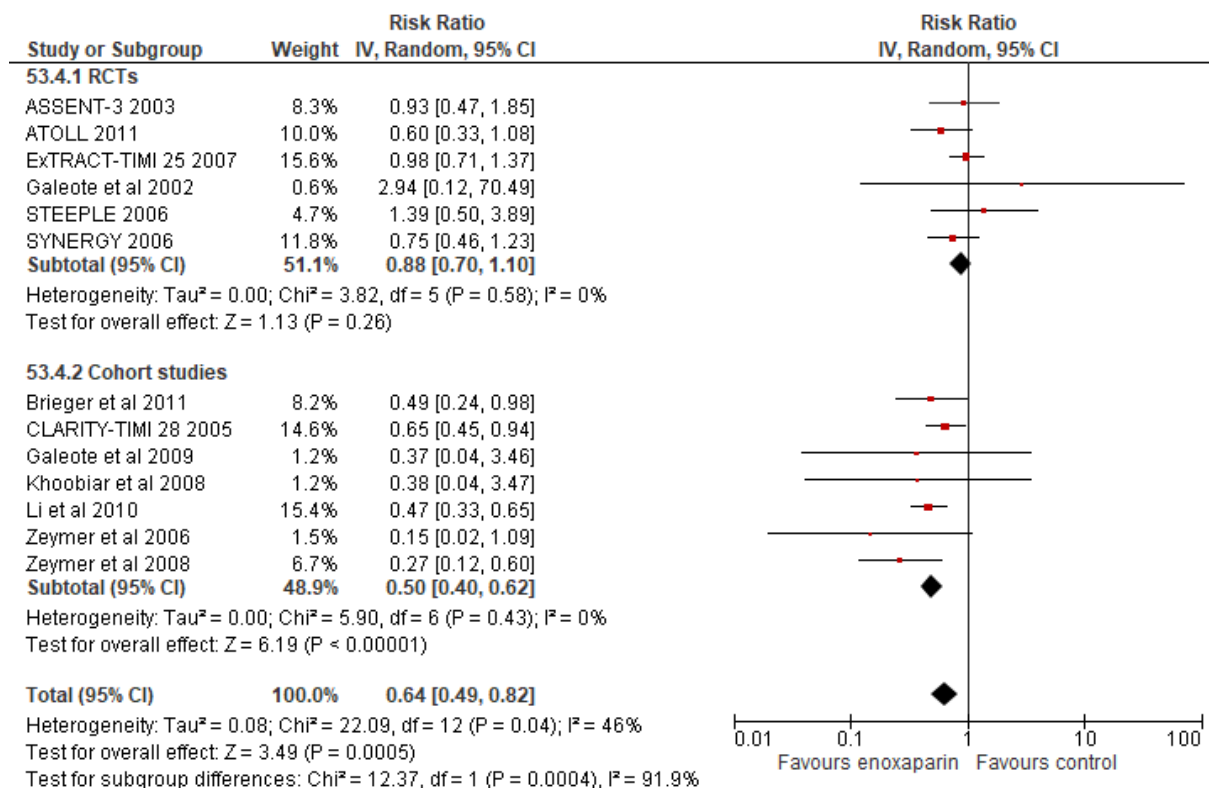

**Figure S89:** Silvain 2012; Intervention/ Exposure: Enoxaparin; Outcome: All-cause mortality

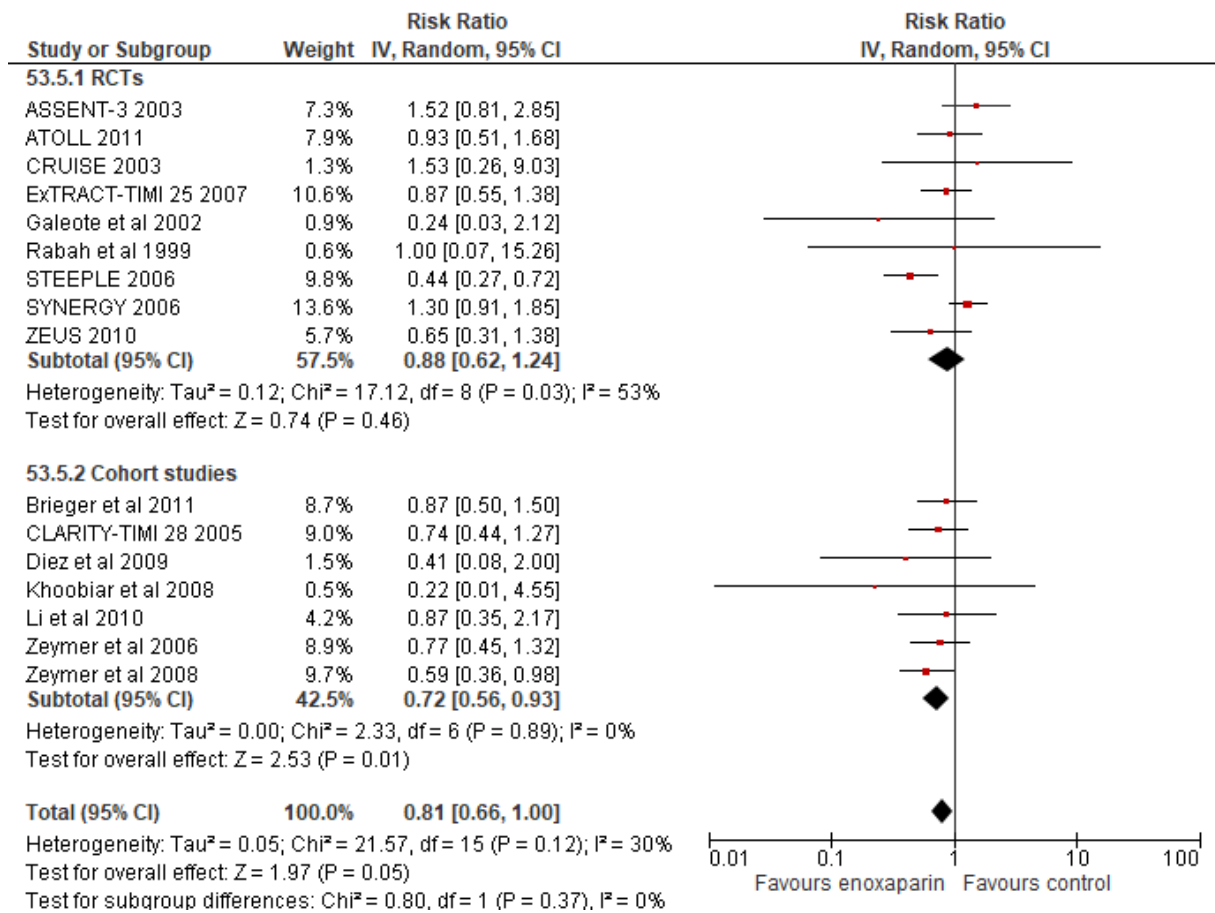

**Figure S90:** Silvain 2012; Intervention/ Exposure: Enoxaparin; Outcome: Major bleeding

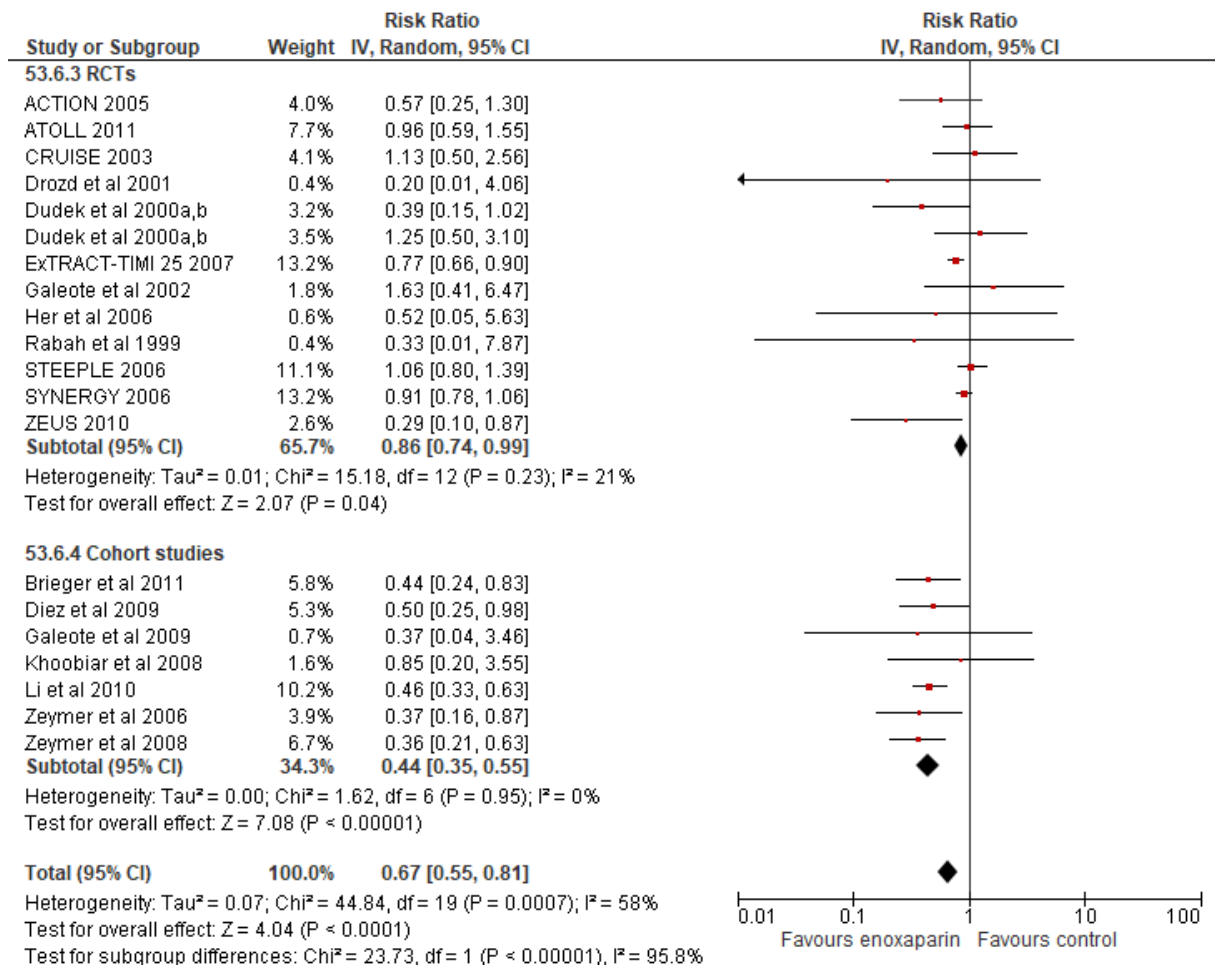

**Figure S91:** Silvain 2012; Intervention/ Exposure: Enoxaparin; Outcome: All-cause mortality or myocardial infarction

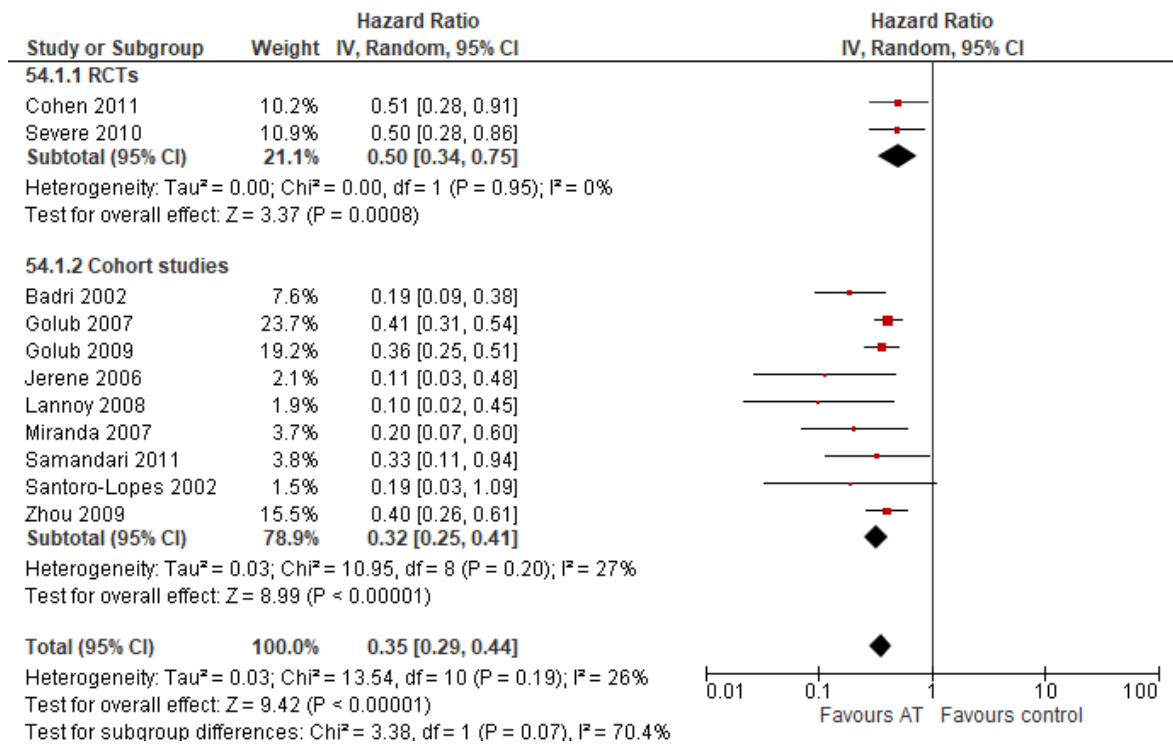

**Figure S92:** Suthar 2012; Intervention/ Exposure: Antiretroviral therapy; Outcome: Tuberculosis infection

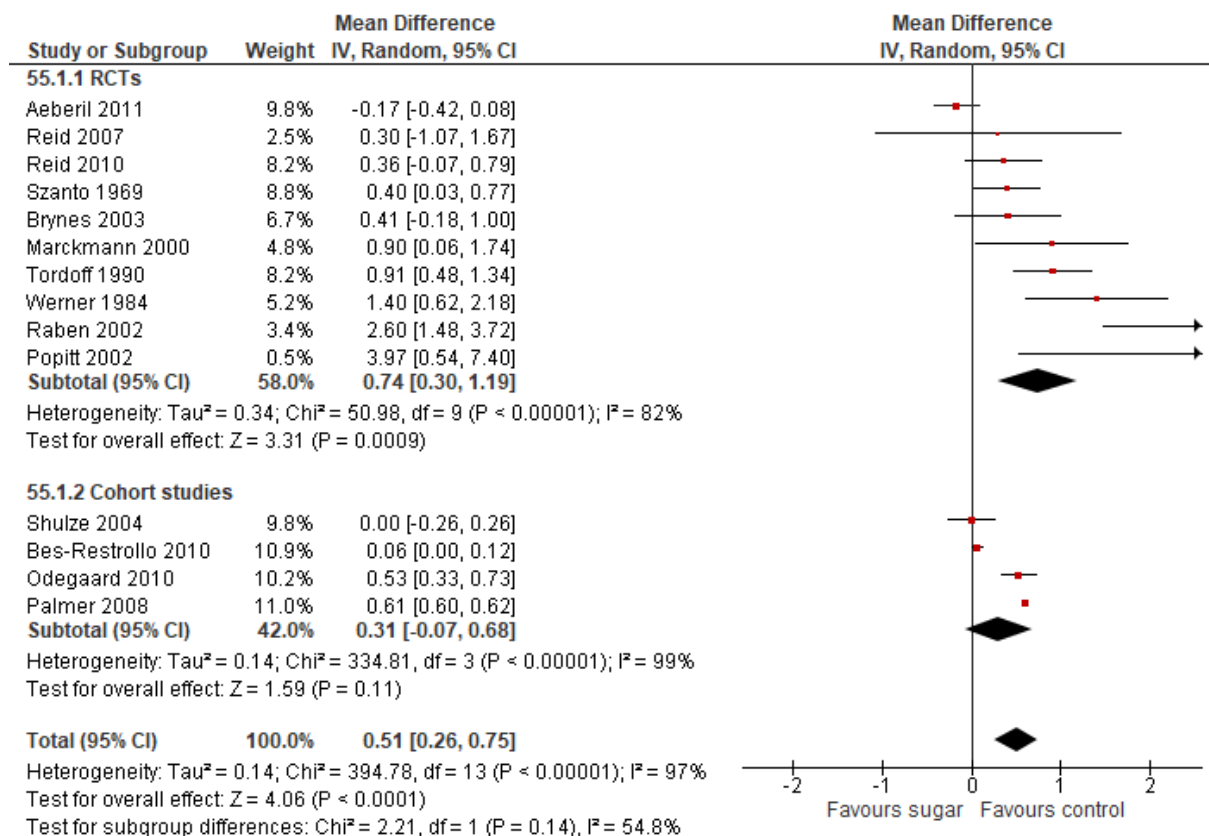

**Figure S93:** Te Morenga 2013; Intervention/ Exposure: High sugar intake; Outcome: Weight gain

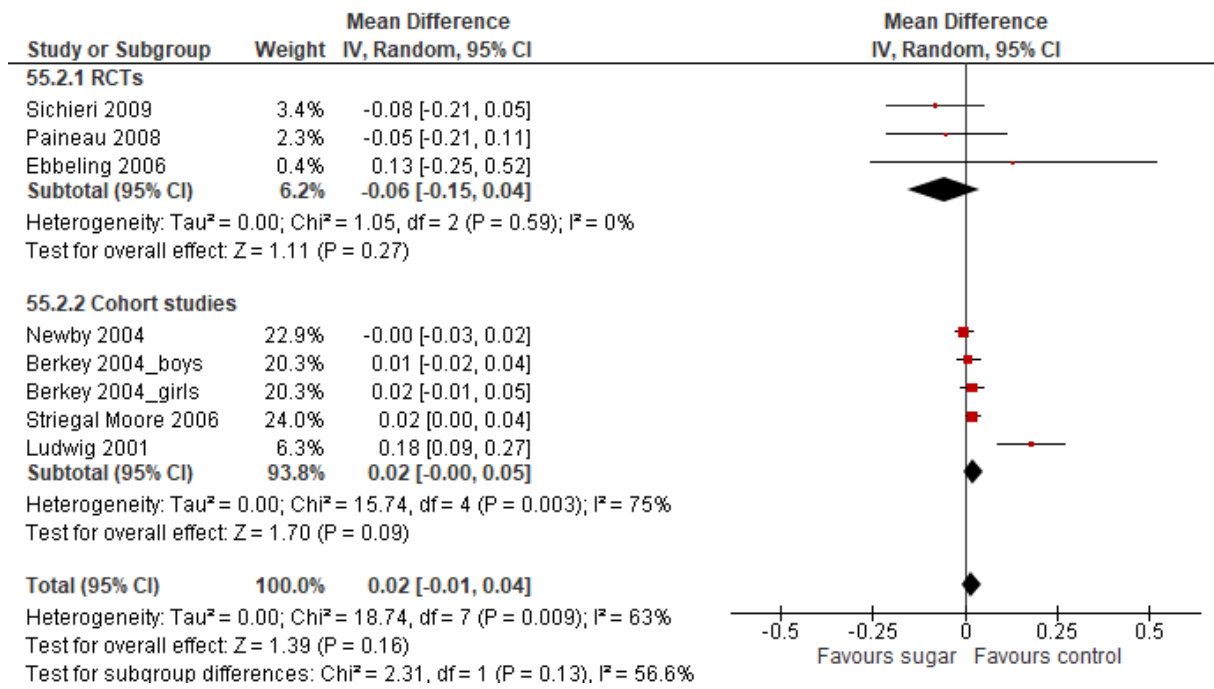

**Figure S94:** Te Morenga 2013; Intervention/ Exposure: High sugar intake; Outcome: Body Mass Index

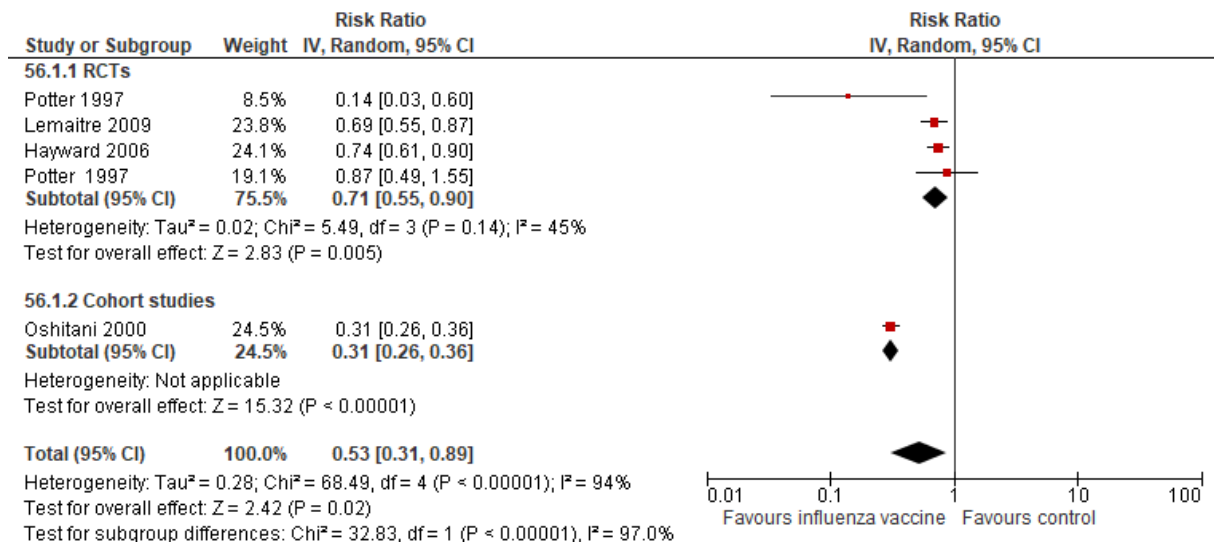

**Figure S95:** Thomas 2010; Intervention/ Exposure: Influenza vaccines; Outcome: Influenza-like illness

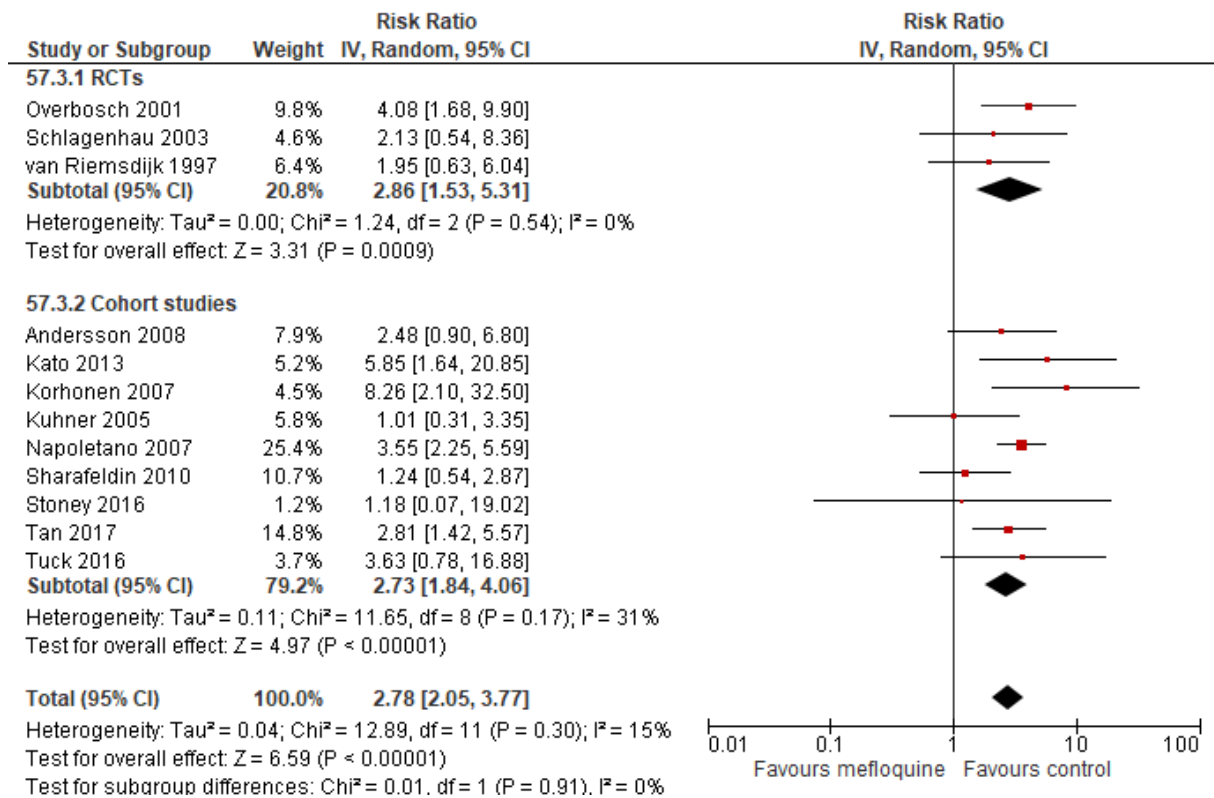

**Figure S96:** Tickell-Painter 2017; Intervention/ Exposure: Mefloquine; Outcome: Discontinuation due to adverse effects



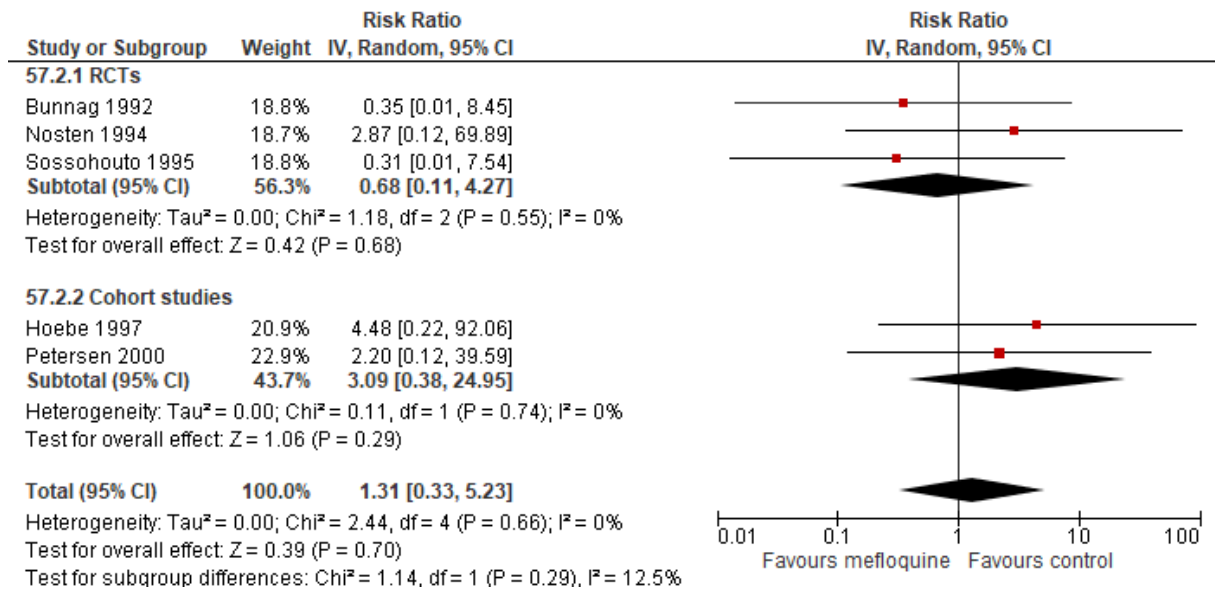

**Figure S97:** Tickell-Painter 2017; Intervention/ Exposure: Mefloquine; Outcome: Serious adverse events or effects

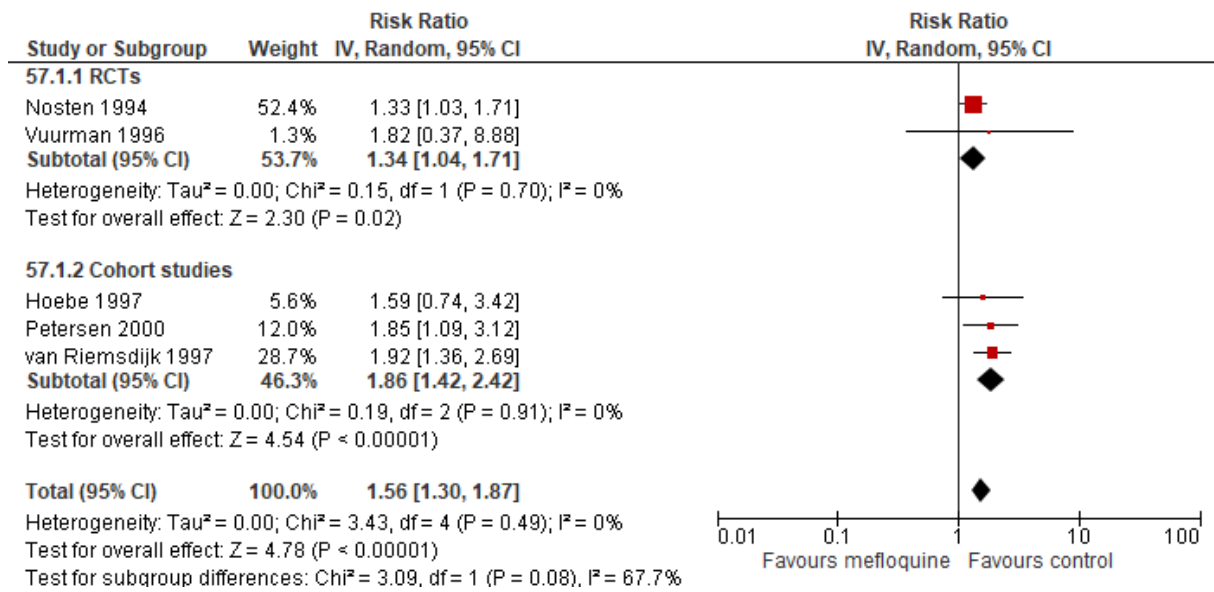

**Figure S98:** Tickell-Painter 2017; Intervention/ Exposure: Mefloquine; Outcome: Nausea

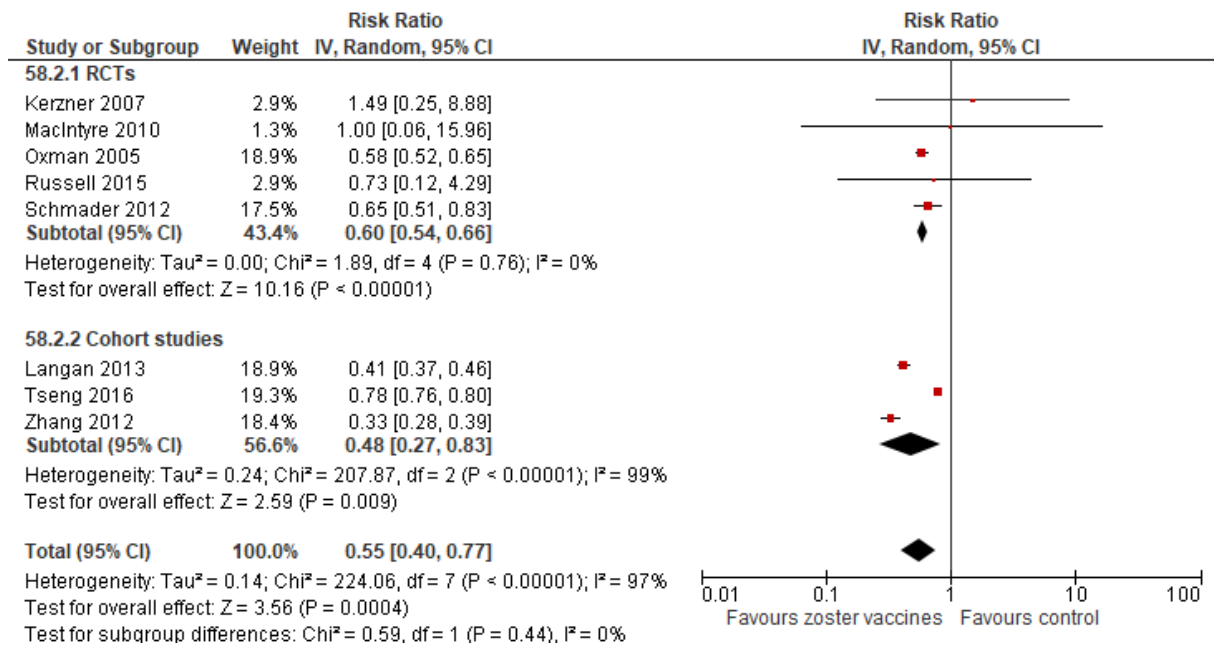

**Figure S99:** Tricco 2018; Intervention/ Exposure: Live-attenuated zoster vaccines; Outcome: Suspected Herpes Zoster

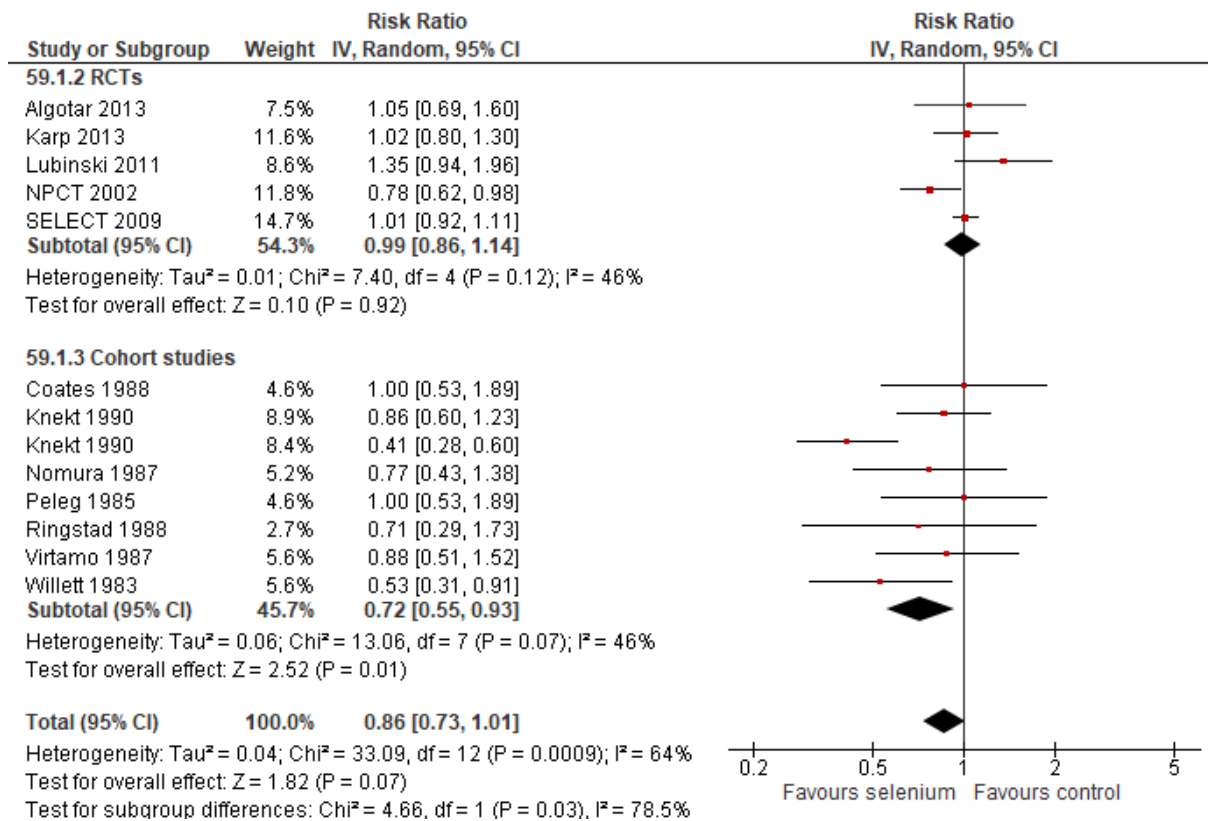

**Figure S100:** Vinceti 2018; Intervention/ Exposure: High selenium; Outcome: Cancer

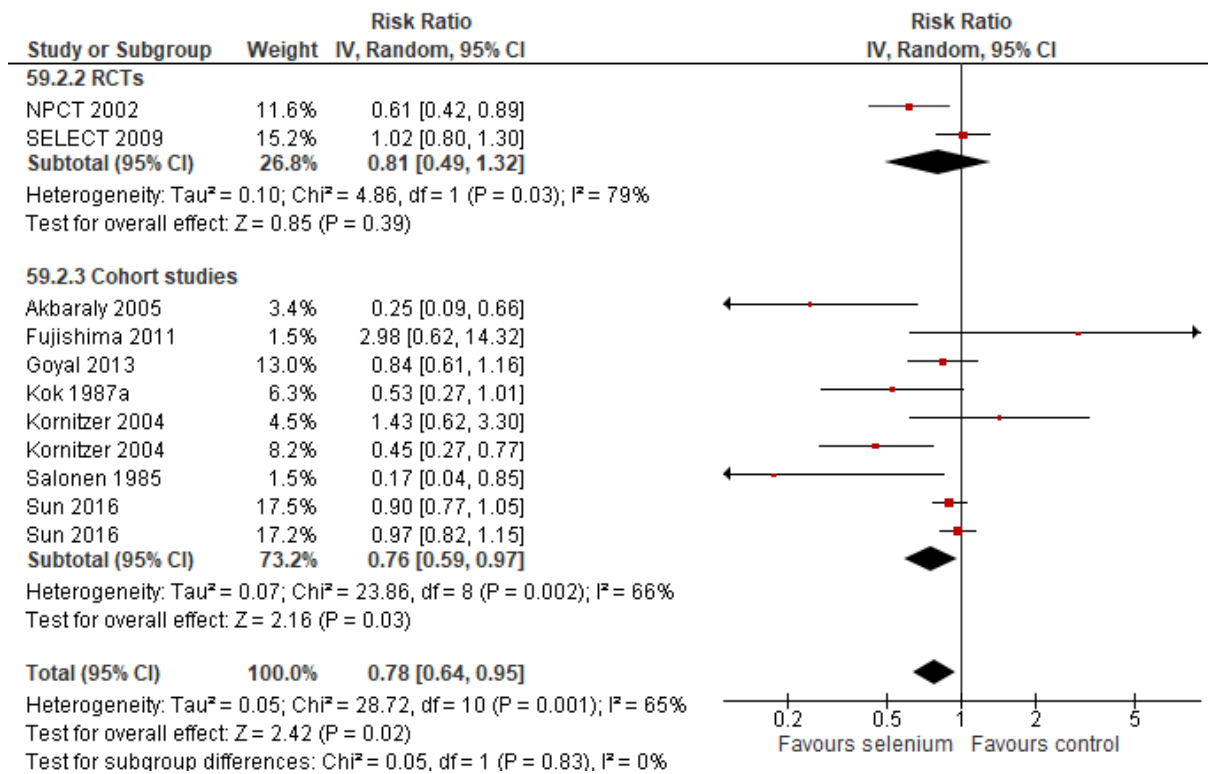

**Figure S101:** Vinceti 2018; Intervention/ Exposure: High selenium; Outcome: Cancer mortality

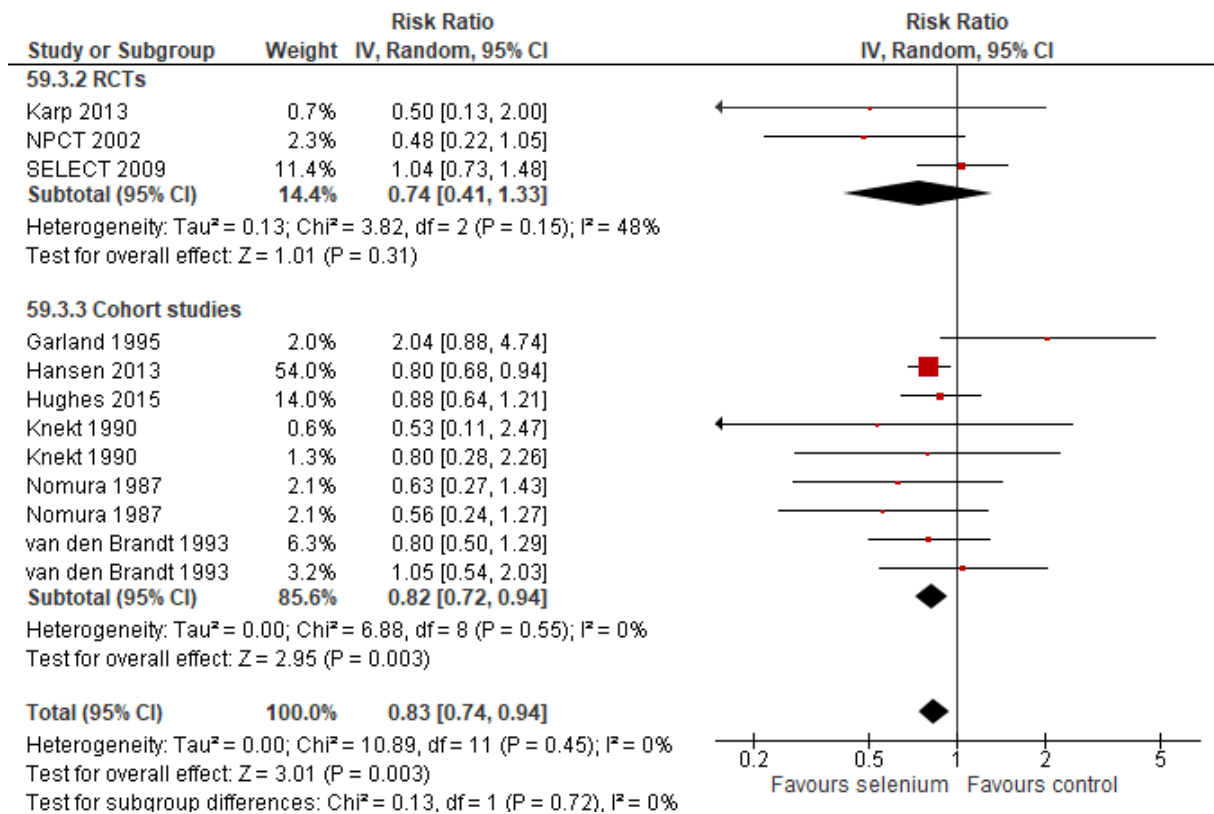

**Figure S102:** Vinceti 2018; Intervention/ Exposure: High selenium; Outcome: Colorectal cancer

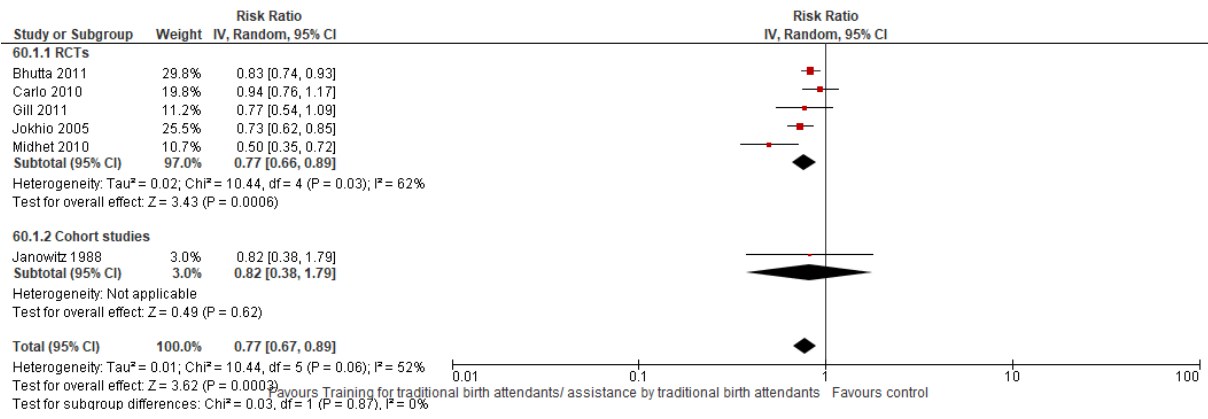

**Figure S103:** Wilson 2011; Intervention/ Exposure: Training for traditional birth attendants/ assistance by traditional birth attendants; Outcome: Perinatal mortality

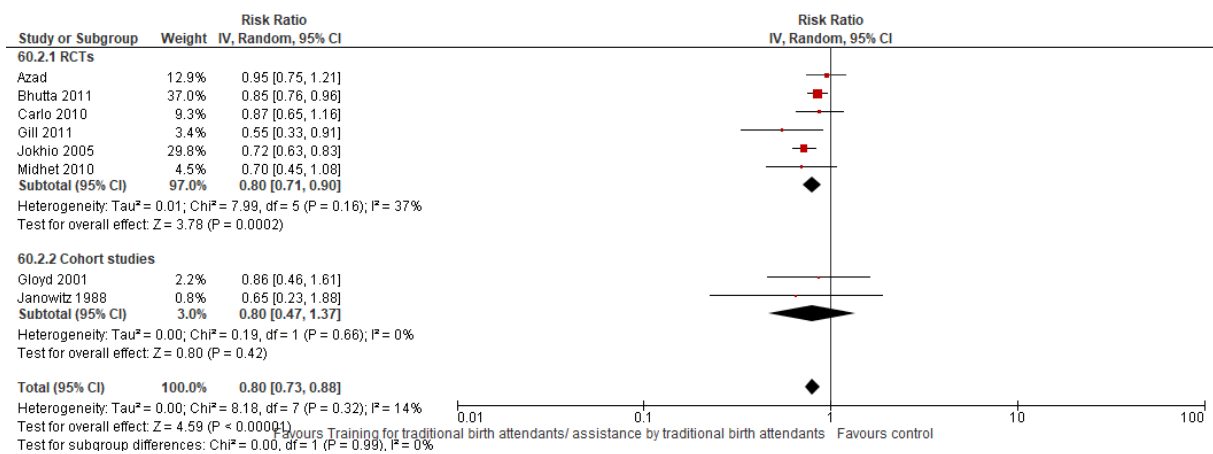

**Figure S104:** Wilson 2011; Intervention/ Exposure: Training for traditional birth attendants/ assistance by traditional birth attendants; Outcome: Neonatal mortality



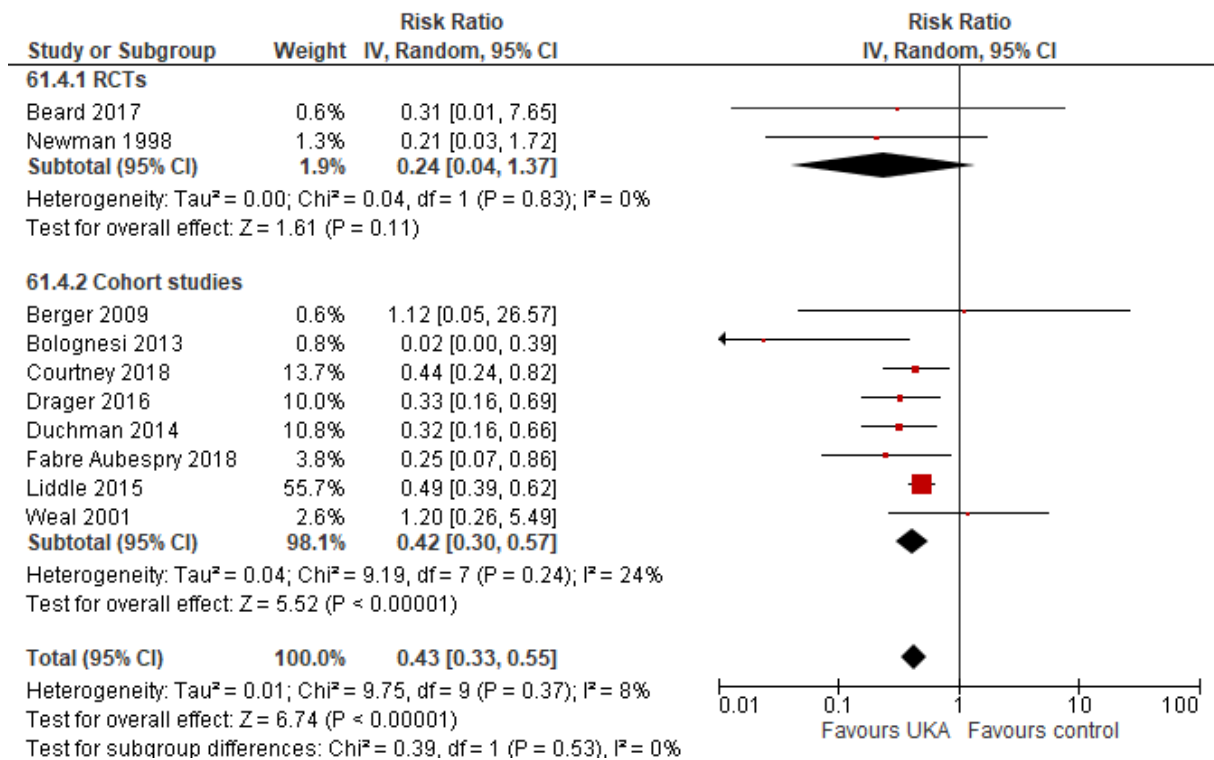

**Figure S105:** Wilson 2019; Intervention/ Exposure: Unicompartimental knee arthroplasty; Outcome: Venous thromboembolism

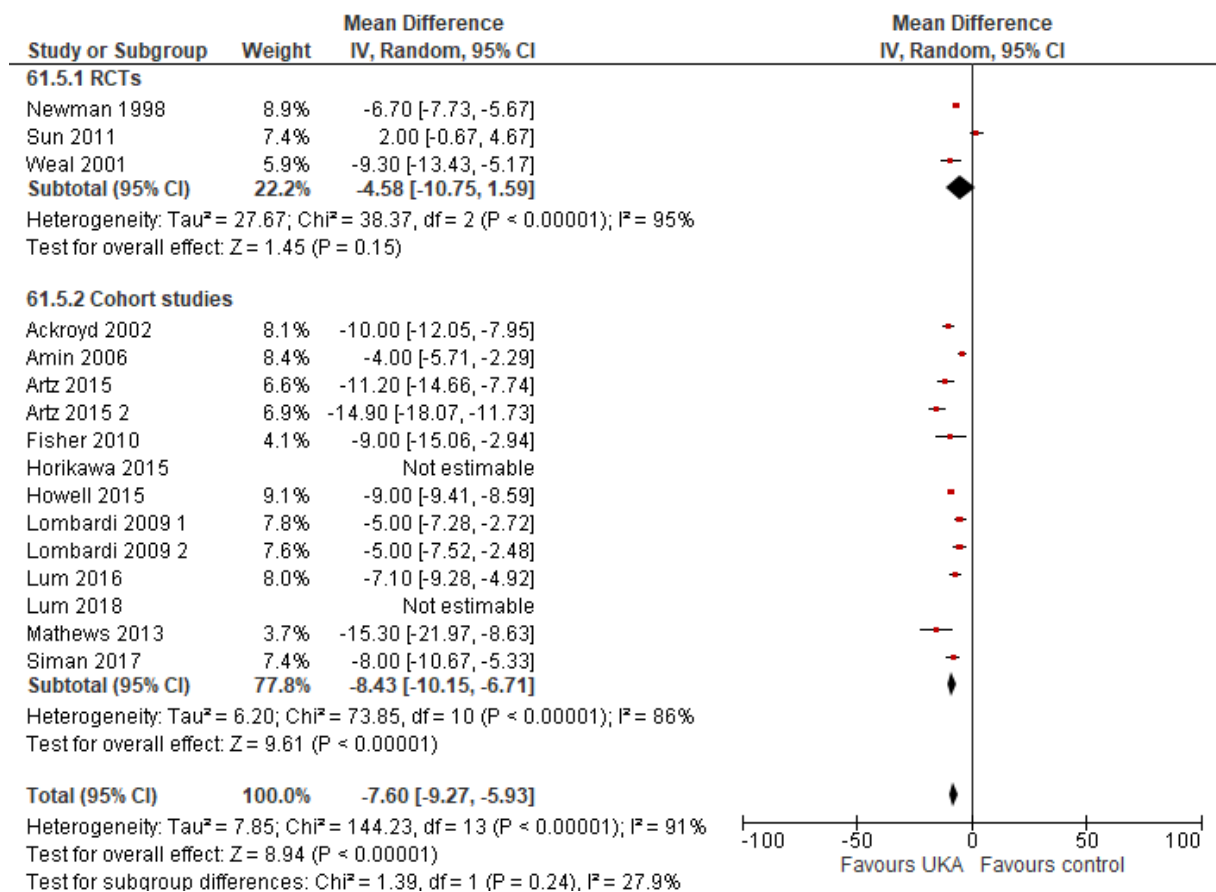

**Figure S106:** Wilson 2019; Intervention/ Exposure: Unicompartmental knee arthroplasty; Outcome: Flexion-extension range

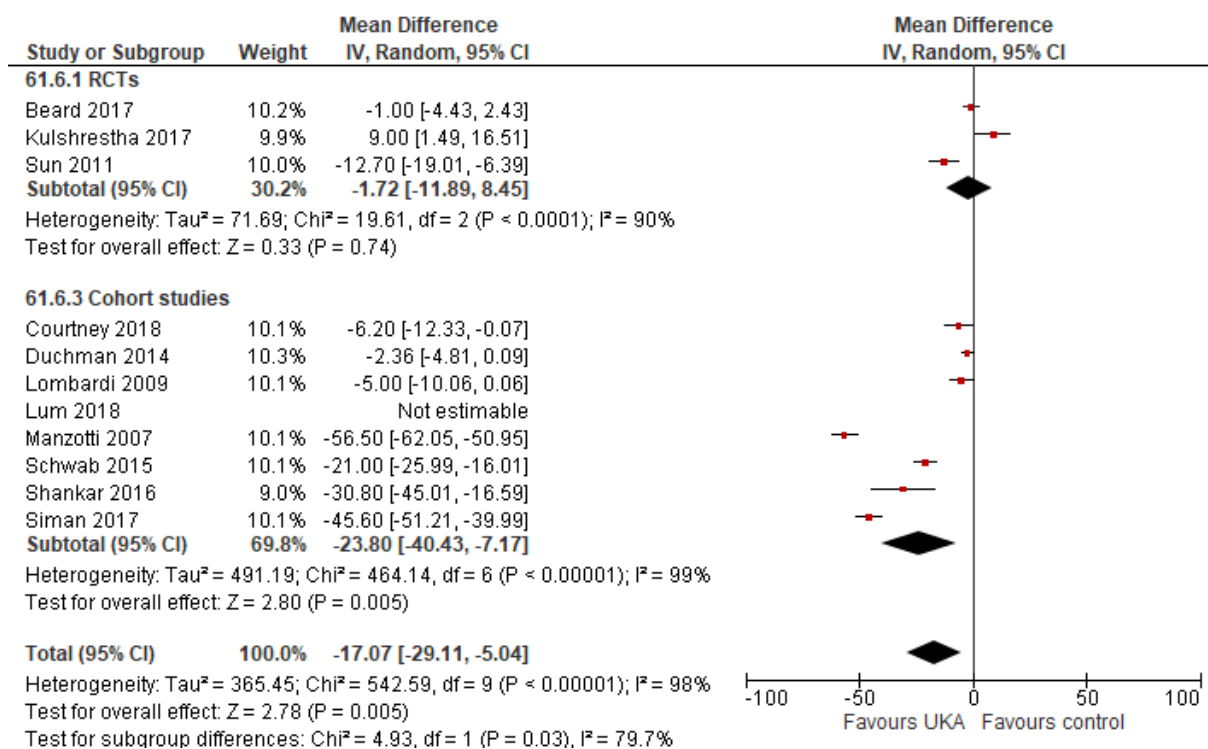

**Figure S107:** Wilson 2019; Intervention/ Exposure: Unicompartmental knee arthroplasty; Outcome: Operation duration

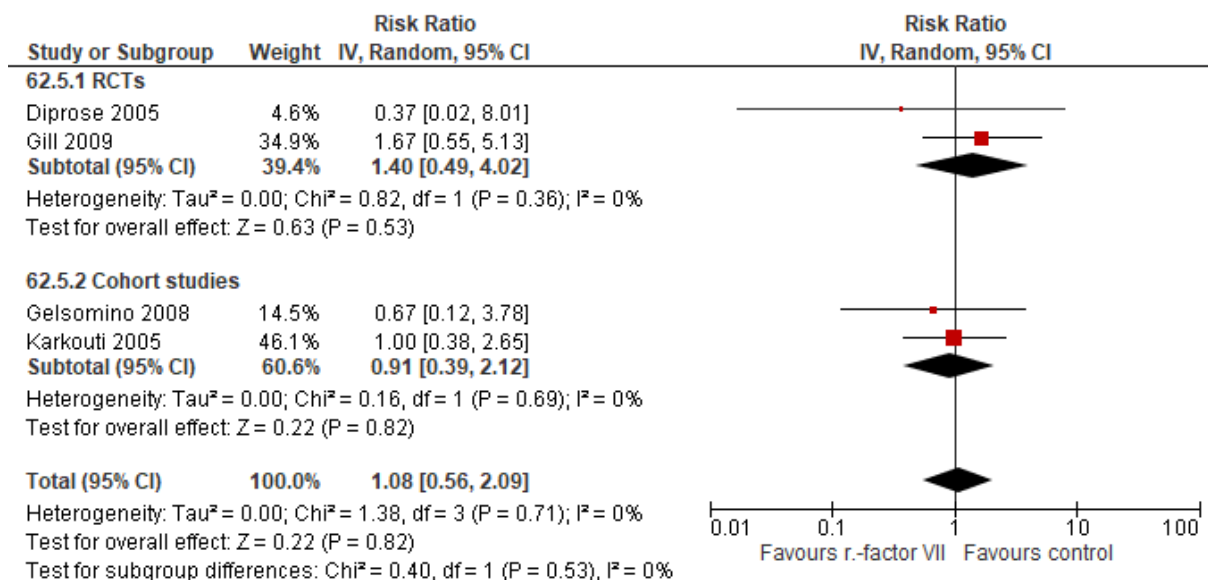

**Figure S108:** Yank 2011; Intervention/ Exposure: Recombinant factor VII; Outcome: All-cause mortality

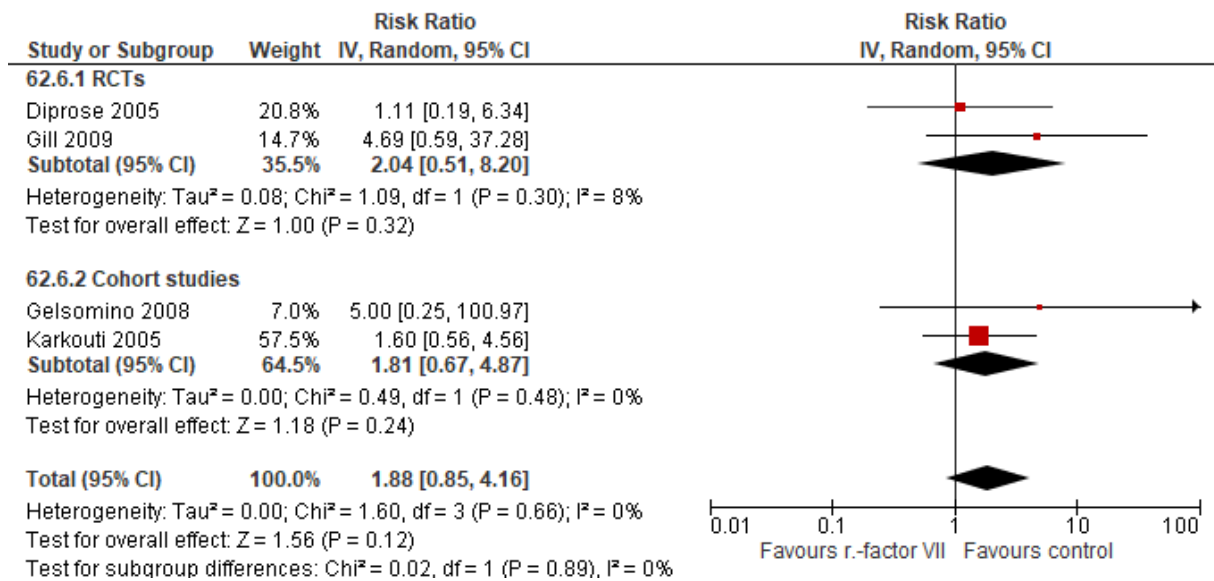

**Figure S109:** Yank 2011; Intervention/ Exposure: Recombinant factor VII; Outcome: Thromboembolism

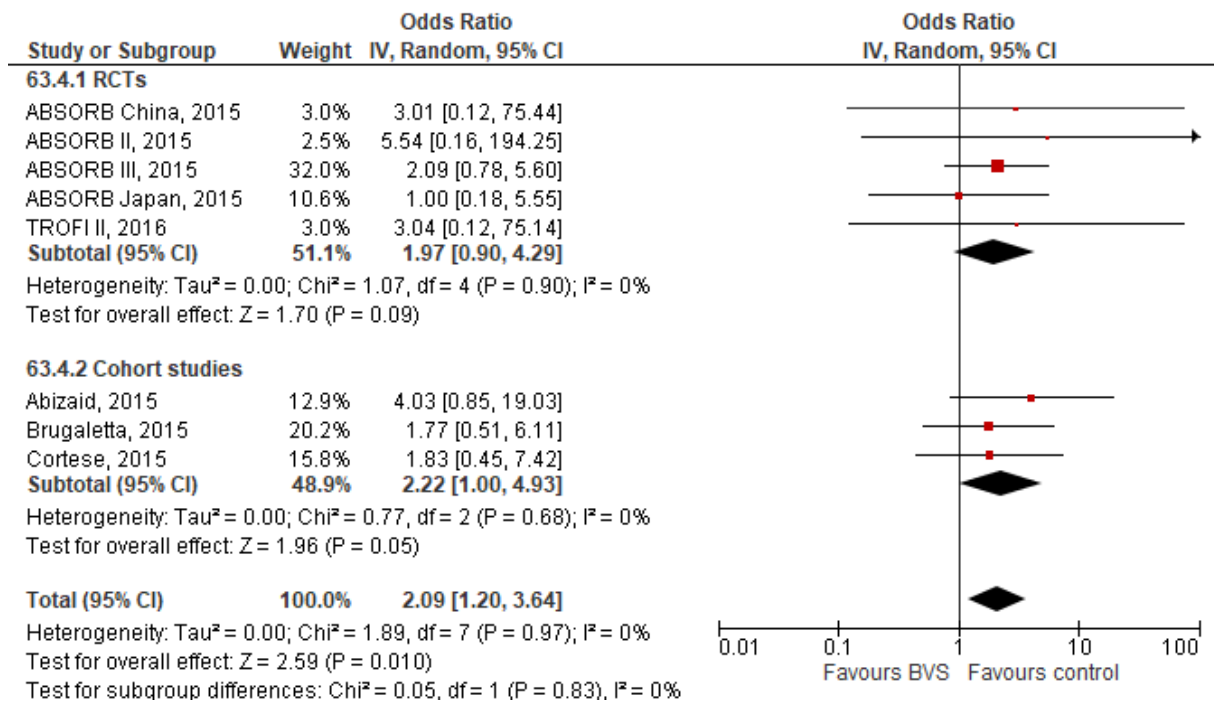

**Figure S110:** Zhang 2016; Intervention/ Exposure: Everolimus-eluting bioresorbable vascular scaffold; Outcome: Stent thrombosis

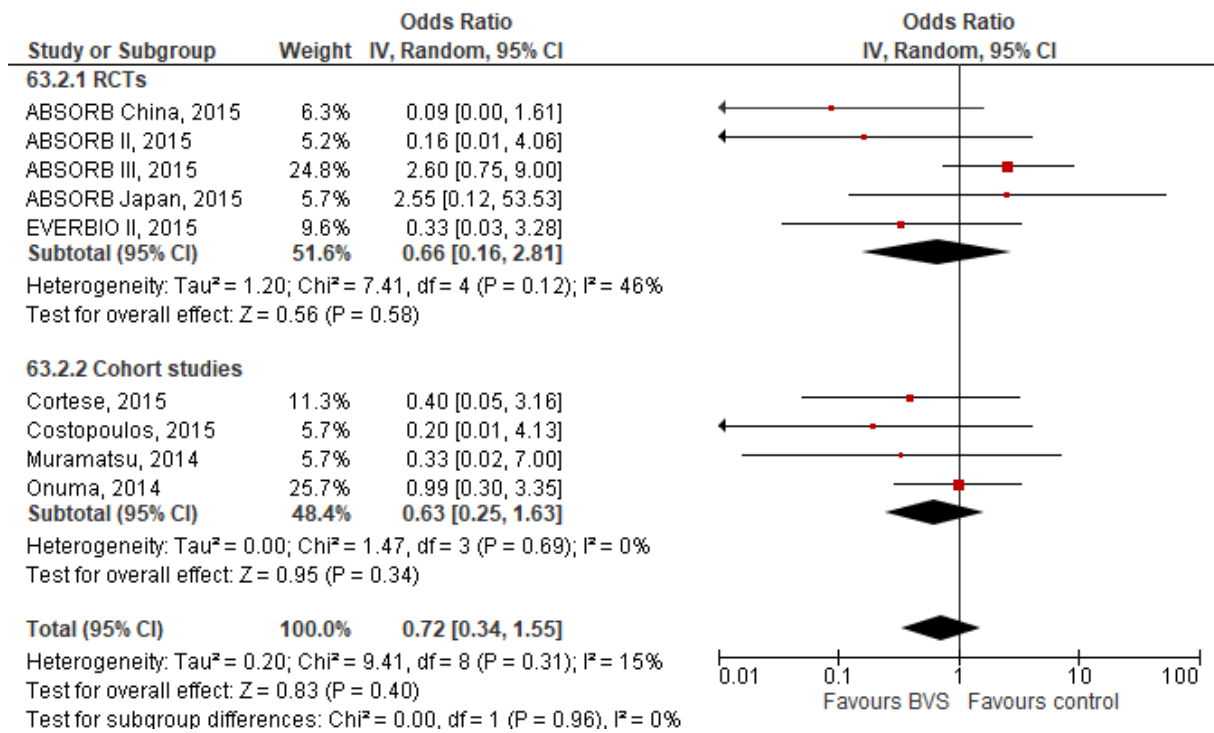

**Figure S111:** Zhang 2016; Intervention/ Exposure: Everolimus-eluting bioresorbable vascular scaffold; Outcome: All-cause mortality

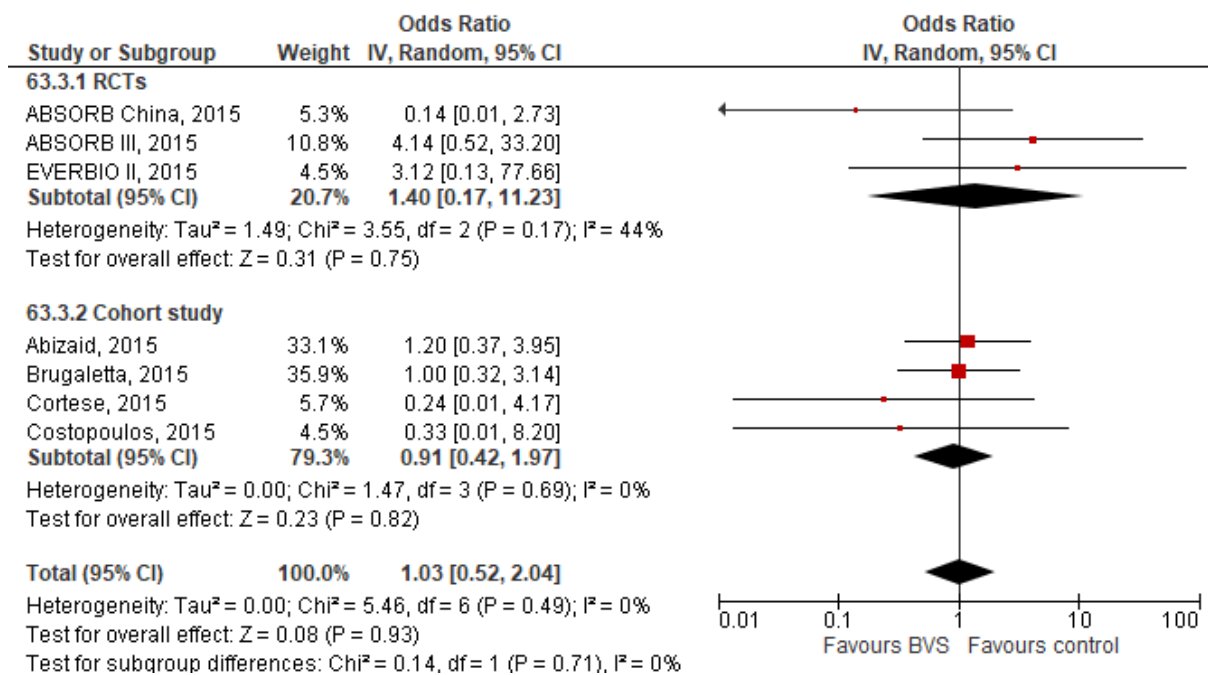

**Figure S112:** Zhang 2016; Intervention/ Exposure: Everolimus-eluting bioresorbable vascular scaffold; Outcome: Coronary heart disease mortality



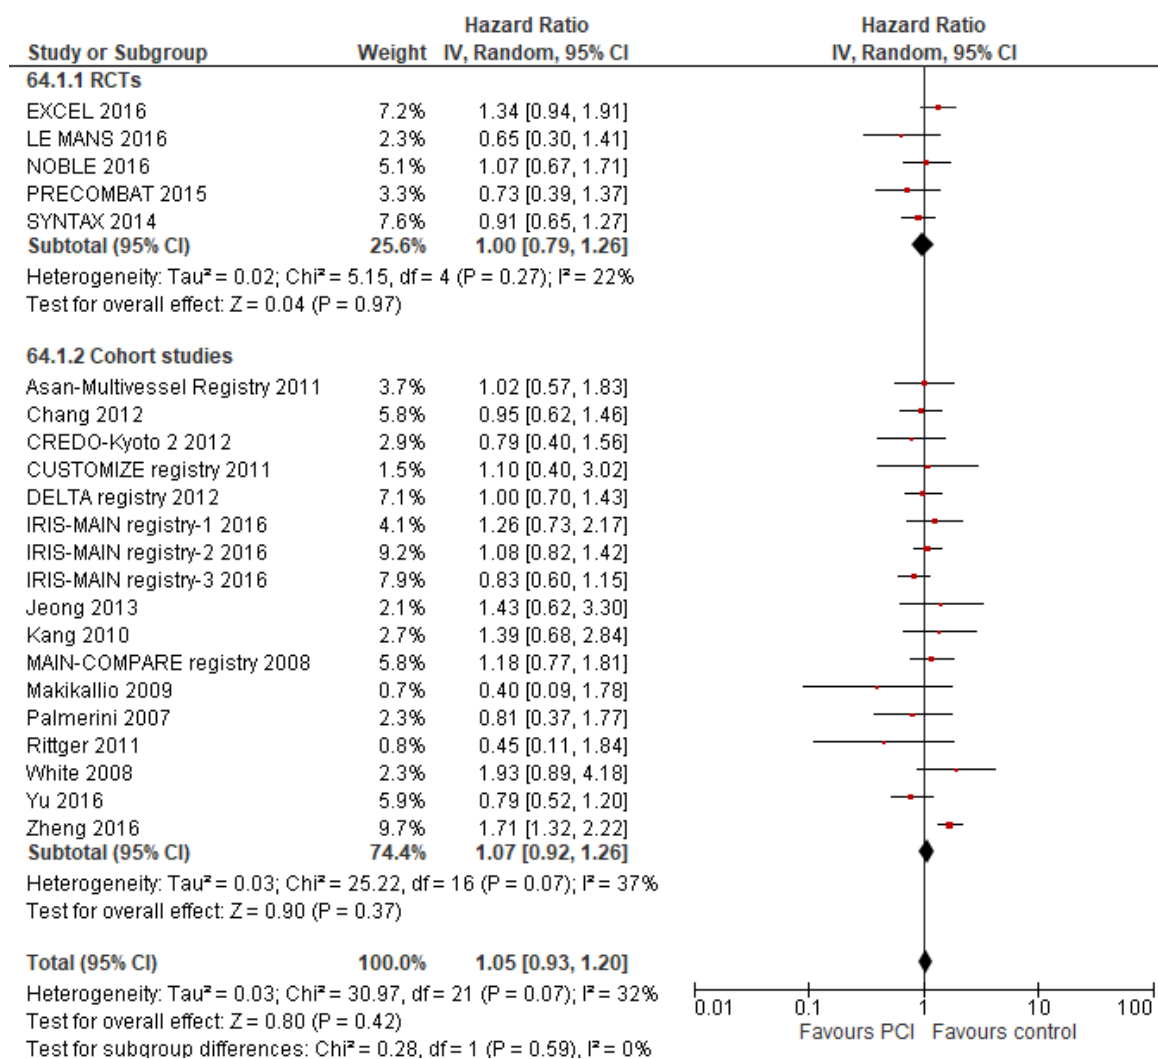

**Figure S113:** Zhang 2017; Intervention/ Exposure: Percutaneous coronary intervention; Outcome: All-cause mortality

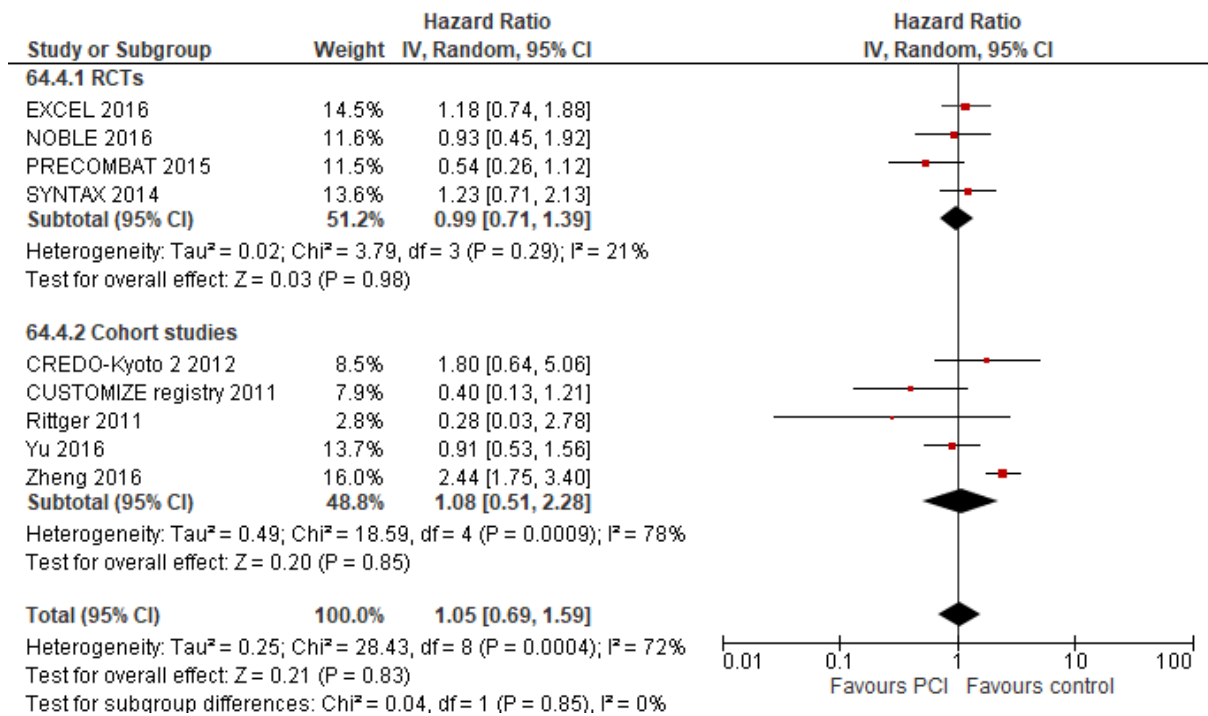

**Figure S114:** Zhang 2017; Intervention/ Exposure: Percutaneous coronary intervention; Outcome: Cardiovascular mortality

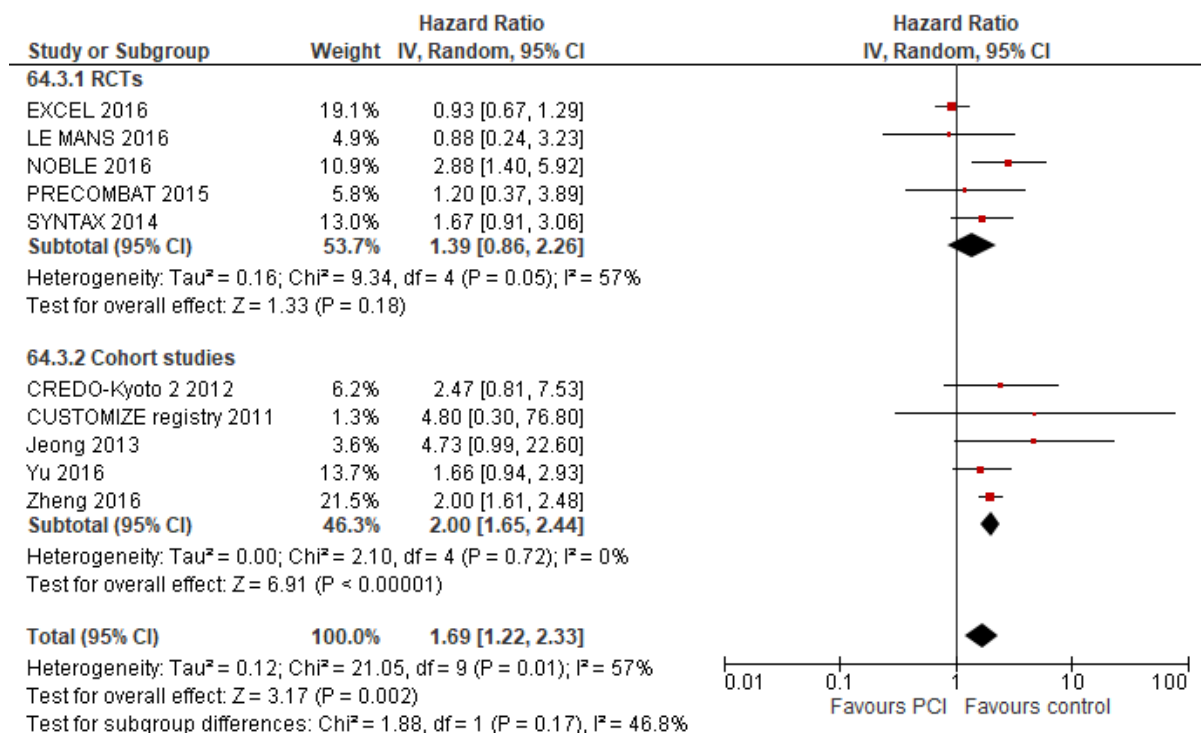

**Figure S115:** Zhang 2017; Intervention/ Exposure: Percutaneous coronary intervention; Outcome: Myocardial infarction

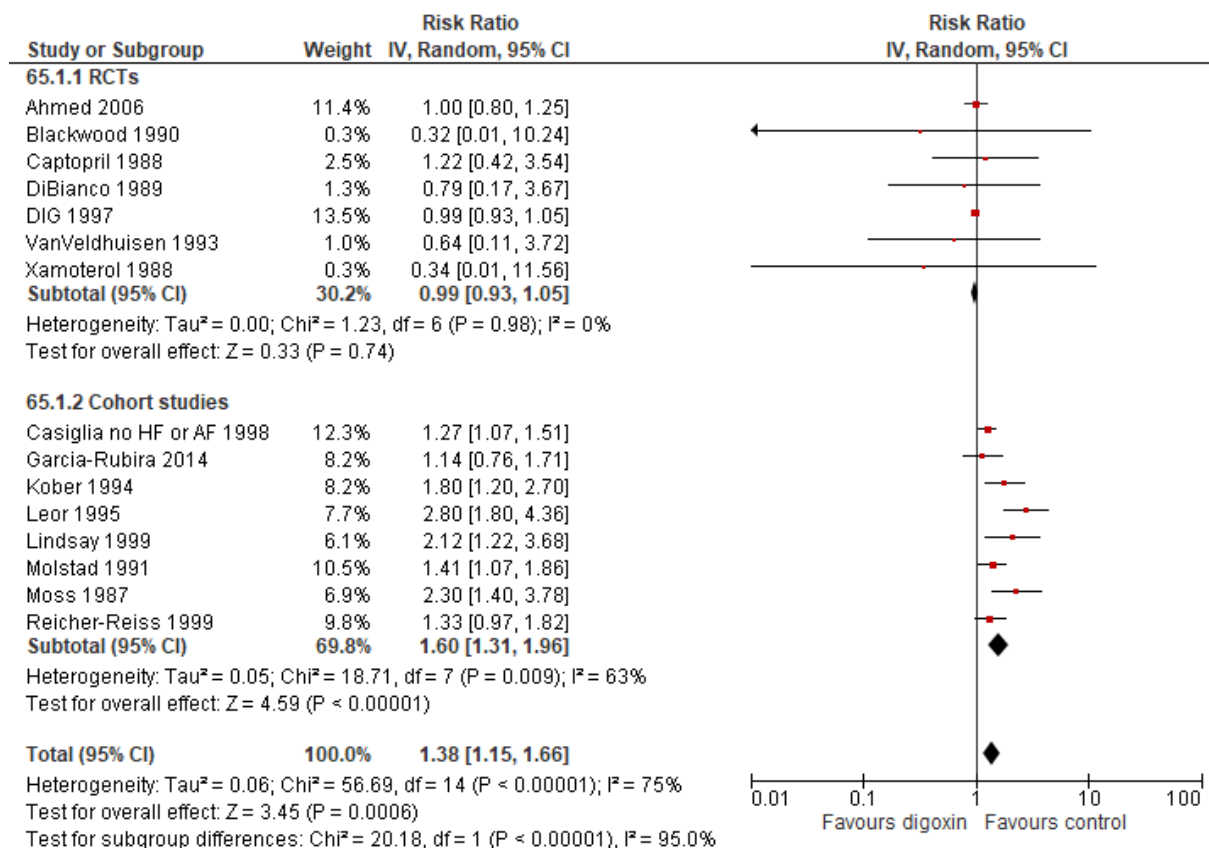

**Figure S116:** Ziff 2015; Intervention/ Exposure: Digoxin;

Outcome: All-cause mortality

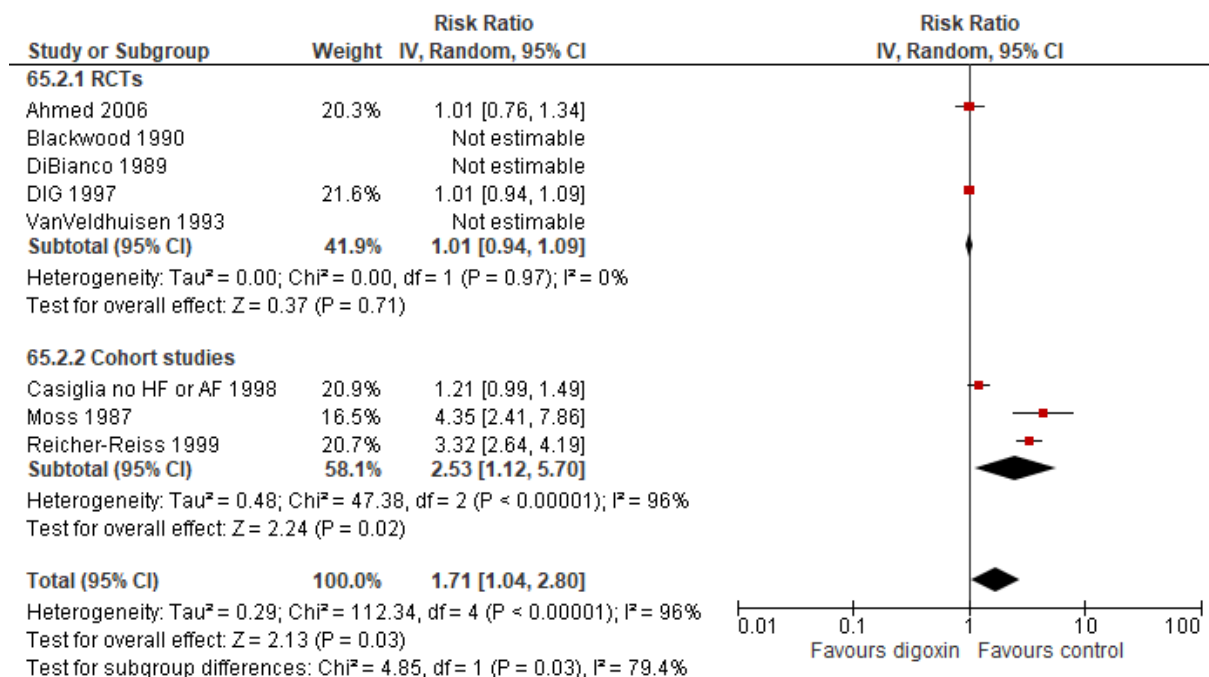

**Figure S117:** Ziff 2015; Intervention/ Exposure: Digoxin; Outcome: Cardiovascular mortality

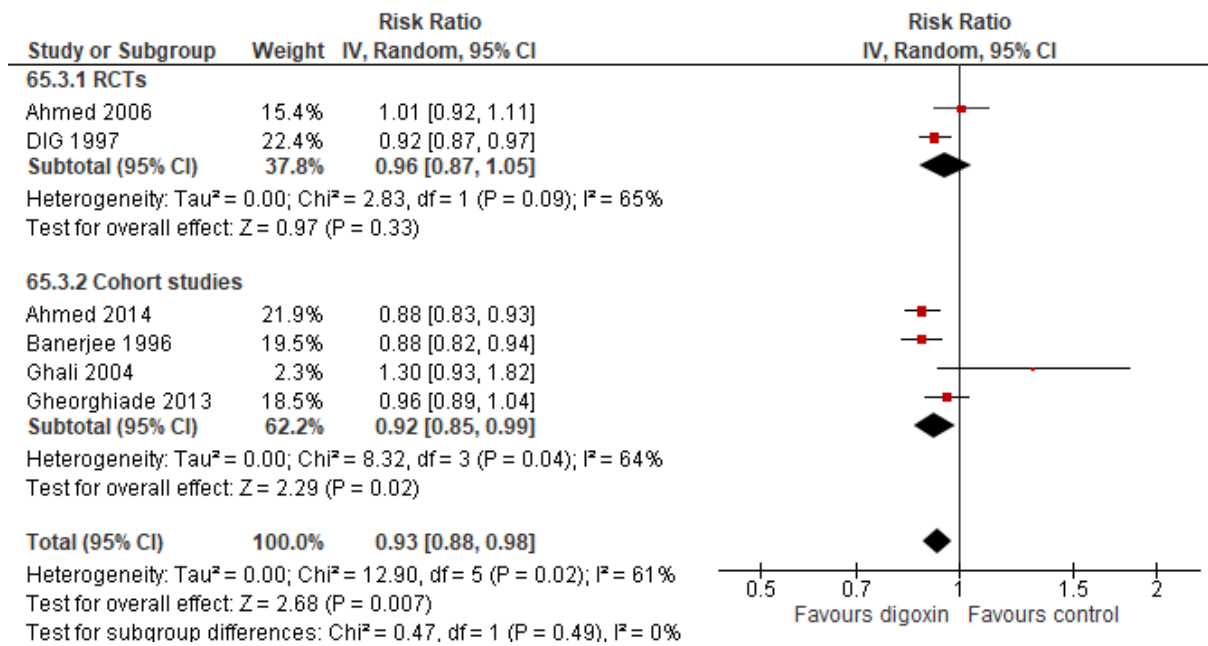

**Figure S118:** Ziff 2015; Intervention/ Exposure: Digoxin; Outcome: Hospital admission

## Supplementary References

1. Abou-Setta AM, Beaupre LA, Rashiq S, Dryden DM, Hamm MP, Sadowski CA, et al. Comparative effectiveness of pain management interventions for hip fracture: a systematic review. *Ann Intern Med.* 2011;155(4):234-45.
2. Aburto NJ, Ziolkovska A, Hooper L, Elliott P, Cappuccio FP, Meerpohl JJ. Effect of lower sodium intake on health: systematic review and meta-analyses. *Bmj.* 2013;346:f1326.
3. Ahmad Y, Sen S, Shun-Shin MJ, Ouyang J, Finegold JA, Al-Lamee RK, et al. Intra-aortic Balloon Pump Therapy for Acute Myocardial Infarction: A Meta-analysis. *JAMA Intern Med.* 2015;175(6):931-9.
4. Alexander DD, Miller PE, Van Elswyk ME, Kuratko CN, Bylsma LC. A Meta-Analysis of Randomized Controlled Trials and Prospective Cohort Studies of Eicosapentaenoic and Docosahexaenoic Long-Chain Omega-3 Fatty Acids and Coronary Heart Disease Risk. *Mayo Clin Proc.* 2017;92(1):15-29.
5. Alipanah N, Jarlsberg L, Miller C, Linh NN, Falzon D, Jaramillo E, et al. Adherence interventions and outcomes of tuberculosis treatment: A systematic review and meta-analysis of trials and observational studies. *PLoS Med.* 2018;15(7):e1002595.
6. Anglemyer A, Rutherford GW, Horvath T, Baggaley RC, Egger M, Siegfried N. Antiretroviral therapy for prevention of HIV transmission in HIV-discordant couples. *Cochrane Database Syst Rev.* 2013(4):Cd009153.
7. Azad MB, Abou-Setta AM, Chauhan BF, Rabbani R, Lys J, Copstein L, et al. Nonnutritive sweeteners and cardiometabolic health: a systematic review and meta-analysis of randomized controlled trials and prospective cohort studies. *Canadian Medical Association Journal.* 2017;189(28):E929.
8. Barnard S, Kim C, Park MH, Ngo TD. Doctors or mid-level providers for abortion. *Cochrane Database Syst Rev.* 2015(7):Cd011242.
9. Bellemain-Appaix A, O'Connor SA, Silvain J, Cucherat M, Beygui F, Barthelemy O, et al. Association of clopidogrel pretreatment with mortality, cardiovascular events, and major bleeding among patients undergoing percutaneous coronary intervention: a systematic review and meta-analysis. *JAMA.* 2012;308(23):2507-16.
10. Bellemain-Appaix A, Kerneis M, O'Connor SA, Silvain J, Cucherat M, Beygui F, et al. Reappraisal of thienopyridine pretreatment in patients with non-ST elevation acute coronary syndrome: a systematic review and meta-analysis. *Bmj.* 2014;349:g6269.
11. Bloomfield HE, Koeller E, Greer N, MacDonald R, Kane R, Wilt TJ. Effects on Health Outcomes of a Mediterranean Diet With No Restriction on Fat Intake: A Systematic Review and Meta-analysis. *Ann Intern Med.* 2016;165(7):491-500.
12. Bolland MJ, Leung W, Tai V, Bastin S, Gamble GD, Grey A, et al. Calcium intake and risk of fracture: systematic review. *Bmj.* 2015;351:h4580.
13. Brenner H, Stock C, Hoffmeister M. Effect of screening sigmoidoscopy and screening colonoscopy on colorectal cancer incidence and mortality: systematic review and meta-analysis of randomised controlled trials and observational studies. *Bmj.* 2014;348:g2467.

14. Chowdhury R, Stevens S, Gorman D, Pan A, Warnakula S, Chowdhury S, et al. Association between fish consumption, long chain omega 3 fatty acids, and risk of cerebrovascular disease: systematic review and meta-analysis. *Bmj*. 2012;345:e6698.
15. Chowdhury R, Warnakula S, Kunutsor S, Crowe F, Ward HA, Johnson L, et al. Association of dietary, circulating, and supplement fatty acids with coronary risk: a systematic review and meta-analysis. *Ann Intern Med*. 2014;160(6):398-406.
16. Chowdhury R, Kunutsor S, Vitezova A, Oliver-Williams C, Chowdhury S, Kieft-de-Jong JC, et al. Vitamin D and risk of cause specific death: systematic review and meta-analysis of observational cohort and randomised intervention studies. *Bmj*. 2014;348:g1903.
17. Chung M, Lee J, Terasawa T, Lau J, Trikalinos TA. Vitamin D with or without calcium supplementation for prevention of cancer and fractures: an updated meta-analysis for the U.S. Preventive Services Task Force. *Ann Intern Med*. 2011;155(12):827-38.
18. Chung M, Tang AM, Fu Z, Wang DD, Newberry SJ. Calcium Intake and Cardiovascular Disease Risk: An Updated Systematic Review and Meta-analysis. *Ann Intern Med*. 2016;165(12):856-66.
19. Ding M, Huang T, Bergholdt HK, Nordestgaard BG, Ellervik C, Qi L. Dairy consumption, systolic blood pressure, and risk of hypertension: Mendelian randomization study. *Bmj*. 2017;356:j1000.
20. Fenton JJ, Weyrich MS, Durbin S, Liu Y, Bang H, Melnikow J. Prostate-Specific Antigen-Based Screening for Prostate Cancer: Evidence Report and Systematic Review for the US Preventive Services Task Force. *JAMA*. 2018;319(18):1914-31.
21. Filippini G, Del Giovane C, Clerico M, Beiki O, Mattoscio M, Piazza F, et al. Treatment with disease-modifying drugs for people with a first clinical attack suggestive of multiple sclerosis. *Cochrane Database Syst Rev*. 2017;4:Cd012200.
22. Fluri F, Engelter S, Lyrer P. Extracranial-intracranial arterial bypass surgery for occlusive carotid artery disease. *Cochrane Database Syst Rev*. 2010(2):Cd005953.
23. Gargiulo G, Sannino A, Capodanno D, Barbanti M, Buccheri S, Perrino C, et al. Transcatheter Aortic Valve Implantation Versus Surgical Aortic Valve Replacement: A Systematic Review and Meta-analysis. *Ann Intern Med*. 2016;165(5):334-44.
24. Hartling L, Dryden DM, Guthrie A, Muise M, Vandermeer B, Donovan L. Benefits and harms of treating gestational diabetes mellitus: a systematic review and meta-analysis for the U.S. Preventive Services Task Force and the National Institutes of Health Office of Medical Applications of Research. *Ann Intern Med*. 2013;159(2):123-9.
25. Henderson JT, Webber EM, Bean SI. Screening for Asymptomatic Bacteriuria in Adults: Updated Evidence Report and Systematic Review for the US Preventive Services Task Force. *JAMA*. 2019;322(12):1195-205.
26. Higgins JP, Soares-Weiser K, Lopez-Lopez JA, Kakourou A, Chaplin K, Christensen H, et al. Association of BCG, DTP, and measles containing vaccines with childhood mortality: systematic review. *Bmj*. 2016;355:i5170.
27. Hopley C, Stengel D, Ekkernkamp A, Wich M. Primary total hip arthroplasty versus hemiarthroplasty for displaced intracapsular hip fractures in older patients: systematic review. *Bmj*. 2010;340:c2332.



28. Hüpfel M, Selig HF, Nagele P. Chest-compression-only versus standard cardiopulmonary resuscitation: a meta-analysis. *Lancet*. 2010;376(9752):1552-7.
29. Jamal SA, Vandermeer B, Raggi P, Mendelssohn DC, Chatterley T, Dorgan M, et al. Effect of calcium-based versus non-calcium-based phosphate binders on mortality in patients with chronic kidney disease: an updated systematic review and meta-analysis. *Lancet*. 2013;382(9900):1268-77.
30. Jefferson T, Di Pietrantonj C, Al-Ansary LA, Ferroni E, Thorning S, Thomas RE. Vaccines for preventing influenza in the elderly. *Cochrane Database Syst Rev*. 2010(2):Cd004876.
31. Jefferson T, Rivetti A, Di Pietrantonj C, Demicheli V, Ferroni E. Vaccines for preventing influenza in healthy children. *Cochrane Database Syst Rev*. 2012(8):Cd004879.
32. Jin H, Leng Q, Li C. Dietary flavonoid for preventing colorectal neoplasms. *Cochrane Database Syst Rev*. 2012(8):Cd009350.
33. Johnston BC, Zeraatkar D, Han MA, Vernooij RWM, Valli C, El Dib R, et al. Unprocessed Red Meat and Processed Meat Consumption: Dietary Guideline Recommendations From the Nutritional Recommendations (NutriRECS) Consortium. *Ann Intern Med*. 2019;171(10):756-64.
34. Kansagara D, Dyer E, Englander H, Fu R, Freeman M, Kagen D. Treatment of anemia in patients with heart disease: a systematic review. *Ann Intern Med*. 2013;159(11):746-57.
35. Keag OE, Norman JE, Stock SJ. Long-term risks and benefits associated with cesarean delivery for mother, baby, and subsequent pregnancies: Systematic review and meta-analysis. *PLoS Med*. 2018;15(1):e1002494.
36. Kredo T, Adeniyi FB, Bateganya M, Pienaar ED. Task shifting from doctors to non-doctors for initiation and maintenance of antiretroviral therapy. *Cochrane Database Syst Rev*. 2014(7):Cd007331.
37. Li L, Shen J, Bala MM, Busse JW, Ebrahim S, Vandvik PO, et al. Incretin treatment and risk of pancreatitis in patients with type 2 diabetes mellitus: systematic review and meta-analysis of randomised and non-randomised studies. *Bmj*. 2014;348:g2366.
38. Li L, Li S, Deng K, Liu J, Vandvik PO, Zhao P, et al. Dipeptidyl peptidase-4 inhibitors and risk of heart failure in type 2 diabetes: systematic review and meta-analysis of randomised and observational studies. *Bmj*. 2016;352:i610.
39. Matthews A, Stanway S, Farmer RE, Strongman H, Thomas S, Lyon AR, et al. Long term adjuvant endocrine therapy and risk of cardiovascular disease in female breast cancer survivors: systematic review. *Bmj*. 2018;363:k3845.
40. Menne J, Dumann E, Haller H, Schmidt BMW. Acute kidney injury and adverse renal events in patients receiving SGLT2-inhibitors: A systematic review and meta-analysis. *PLoS Med*. 2019;16(12):e1002983.
41. Mesgarpour B, Heidinger BH, Roth D, Schmitz S, Walsh CD, Herkner H. Harms of off-label erythropoiesis-stimulating agents for critically ill people. *Cochrane Database Syst Rev*. 2017;8:Cd010969.
42. Moberley S, Holden J, Tatham DP, Andrews RM. Vaccines for preventing pneumococcal infection in adults. *Cochrane Database Syst Rev*. 2013(1):Cd000422.

43. Molnar AO, Fergusson D, Tsampalieros AK, Bennett A, Fergusson N, Ramsay T, et al. Generic immunosuppression in solid organ transplantation: systematic review and meta-analysis. *Bmj*. 2015;350:h3163.
44. Navarese EP, Gurbel PA, Andreotti F, Tantry U, Jeong YH, Kozinski M, et al. Optimal timing of coronary invasive strategy in non-ST-segment elevation acute coronary syndromes: a systematic review and meta-analysis. *Ann Intern Med*. 2013;158(4):261-70.
45. Nelson RL, Furner SE, Westercamp M, Farquhar C. Cesarean delivery for the prevention of anal incontinence. *Cochrane Database Syst Rev*. 2010(2):Cd006756.
46. Nieuwenhuijse MJ, Nelissen RG, Schoones JW, Sedrakyan A. Appraisal of evidence base for introduction of new implants in hip and knee replacement: a systematic review of five widely used device technologies. *Bmj*. 2014;349:g5133.
47. Nikooie R, Neufeld KJ, Oh ES, Wilson LM, Zhang A, Robinson KA, et al. Antipsychotics for Treating Delirium in Hospitalized Adults: A Systematic Review. *Ann Intern Med*. 2019.
48. Ochen Y, Beks RB, van Heijl M, Hietbrink F, Leenen LPH, van der Velde D, et al. Operative treatment versus nonoperative treatment of Achilles tendon ruptures: systematic review and meta-analysis. *Bmj*. 2019;364:k5120.
49. Pittas AG, Chung M, Trikalinos T, Mitri J, Brendel M, Patel K, et al. Systematic review: Vitamin D and cardiometabolic outcomes. *Ann Intern Med*. 2010;152(5):307-14.
50. Raman G, Moorthy D, Hadar N, Dahabreh IJ, O'Donnell TF, Thaler DE, et al. Management strategies for asymptomatic carotid stenosis: a systematic review and meta-analysis. *Ann Intern Med*. 2013;158(9):676-85.
51. Schweizer M, Perencevich E, McDanel J, Carson J, Formanek M, Hafner J, et al. Effectiveness of a bundled intervention of decolonization and prophylaxis to decrease Gram positive surgical site infections after cardiac or orthopedic surgery: systematic review and meta-analysis. *Bmj*. 2013;346:f2743.
52. Silvain J, Beygui F, Barthelemy O, Pollack C, Cohen M, Zeymer U, et al. Efficacy and safety of enoxaparin versus unfractionated heparin during percutaneous coronary intervention: systematic review and meta-analysis. *Bmj*. 2012;344:e553.
53. Suthar AB, Lawn SD, del Amo J, Getahun H, Dye C, Sculier D, et al. Antiretroviral therapy for prevention of tuberculosis in adults with HIV: a systematic review and meta-analysis. *PLoS Med*. 2012;9(7):e1001270.
54. Te Morenga L, Mallard S, Mann J. Dietary sugars and body weight: systematic review and meta-analyses of randomised controlled trials and cohort studies. *Bmj*. 2013;346:e7492.
55. Thomas RE, Jefferson T, Lasserson TJ. Influenza vaccination for healthcare workers who work with the elderly. *Cochrane Database Syst Rev*. 2010(2):Cd005187.
56. Tickell-Painter M, Maayan N, Saunders R, Pace C, Sinclair D. Mefloquine for preventing malaria during travel to endemic areas. *Cochrane Database Syst Rev*. 2017;10:Cd006491.
57. Tricco AC, Zarin W, Cardoso R, Veroniki AA, Khan PA, Nincic V, et al. Efficacy, effectiveness, and safety of herpes zoster vaccines in adults aged 50 and older: systematic review and network meta-analysis. *Bmj*. 2018;363:k4029.

58. Vinceti M, Filippini T, Del Giovane C, Dennert G, Zwahlen M, Brinkman M, et al. Selenium for preventing cancer. *Cochrane Database Syst Rev.* 2018;1:Cd005195.
59. Wilson A, Gallos ID, Plana N, Lissauer D, Khan KS, Zamora J, et al. Effectiveness of strategies incorporating training and support of traditional birth attendants on perinatal and maternal mortality: meta-analysis. *Bmj.* 2011;343:d7102.
60. Wilson HA, Middleton R, Abram SGF, Smith S, Alvand A, Jackson WF, et al. Patient relevant outcomes of unicompartmental versus total knee replacement: systematic review and meta-analysis. *Bmj.* 2019;364:i352.
61. Yank V, Tuohy CV, Logan AC, Bravata DM, Staudenmayer K, Eisenhut R, et al. Systematic review: benefits and harms of in-hospital use of recombinant factor VIIa for off-label indications. *Ann Intern Med.* 2011;154(8):529-40.
62. Zhang XL, Zhu L, Wei ZH, Zhu QQ, Qiao JZ, Dai Q, et al. Comparative Efficacy and Safety of Everolimus-Eluting Bioresorbable Scaffold Versus Everolimus-Eluting Metallic Stents: A Systematic Review and Meta-analysis. *Ann Intern Med.* 2016;164(11):752-63.
63. Zhang XL, Zhu QQ, Yang JJ, Chen YH, Li Y, Zhu SH, et al. Percutaneous intervention versus coronary artery bypass graft surgery in left main coronary artery stenosis: a systematic review and meta-analysis. *BMC Med.* 2017;15(1):84.
64. Ziff OJ, Lane DA, Samra M, Griffith M, Kirchhof P, Lip GY, et al. Safety and efficacy of digoxin: systematic review and meta-analysis of observational and controlled trial data. *Bmj.* 2015;351:h4451.
65. Bröckelmann N, Balduzzi S, Harms L, Beyerbach J, Petropoulou M, Kubiak C, et al. Evaluating agreement between bodies of evidence from randomized controlled trials and cohort studies in medical research: a meta-epidemiological study. *BMC Med.* 2022;20(1):174.
